# Supplementary material
Source: PubMed Central journal article supplement (PMC5049701)

## Supplementary Information

### Plant-like biosynthesis of isoquinoline alkaloids in *Aspergillus fumigatus*

Joshua A. Baccile<sup>1,#</sup>, Joseph E. Spraker<sup>2,#</sup>, Henry H. Le<sup>1</sup>, Eileen Brandenburger<sup>3</sup>, Christian Gomez<sup>1</sup>, Jin Woo Bok<sup>4</sup>, Juliane Macheleidt<sup>5</sup>, Axel A. Brakhage<sup>5</sup>, Dirk Hoffmeister<sup>3</sup>, Nancy P. Keller<sup>4,6\*</sup>, Frank C. Schroeder<sup>1,\*</sup>

<sup>1</sup>Boyce Thompson Institute and Department of Chemistry and Chemical Biology, Cornell University, Ithaca, NY, United States

<sup>2</sup>Department of Plant Pathology, University of Wisconsin-Madison, WI, United States

<sup>3</sup>Department of Pharmaceutical Microbiology at the Hans-Knöll-Institute, Friedrich Schiller University, Jena, Germany

<sup>4</sup>Department of Bacteriology, University of Wisconsin-Madison, WI, United States

<sup>5</sup>Molecular and Applied Microbiology, Leibniz Institute for Natural Product Research and Infection Biology (HKI), and Institute for Microbiology, Friedrich Schiller University, Jena, Germany

<sup>6</sup>Department of Medical Microbiology and Immunology, University of Wisconsin-Madison, WI, United States

#These authors contributed equally

\*To whom correspondence should be directed

## Supplementary Results

**Supplementary Table 1. LC-HRMS data of reported compounds**

| Compound | HR-ESI(+/-) observed ( <i>m/z</i> ) | Ion                | Calculated ion formula                                                       | Calculated <i>m/z</i> | Retention time [min] | Yield of compound (per L culture)* |
|----------|-------------------------------------|--------------------|------------------------------------------------------------------------------|-----------------------|----------------------|------------------------------------|
| 1        | 281.1137                            | [M+H] <sup>+</sup> | C <sub>13</sub> H <sub>17</sub> N <sub>2</sub> O <sub>5</sub> <sup>+</sup>   | 281.1132              | 0.74                 | ~1–5 mg                            |
| 2        | 359.0557                            | [M-H] <sup>-</sup> | C <sub>13</sub> H <sub>15</sub> N <sub>2</sub> O <sub>8</sub> S <sup>-</sup> | 359.0555              | 0.81                 | ~1–5 mg                            |
| 3        | 289.0471                            | [M-H] <sup>-</sup> | C <sub>13</sub> H <sub>9</sub> N <sub>2</sub> O <sub>6</sub> <sup>-</sup>    | 289.0466              | 4.31                 | ~10–50 mg                          |
| 4        | 241.0255                            | [M-H] <sup>-</sup> | C <sub>12</sub> H <sub>5</sub> N <sub>2</sub> O <sub>4</sub> <sup>-</sup>    | 241.0255              | 4.38                 |                                    |
| 5        | 227.0462                            | [M-H] <sup>-</sup> | C <sub>12</sub> H <sub>7</sub> N <sub>2</sub> O <sub>3</sub> <sup>-</sup>    | 227.0462              | 6.58                 |                                    |
| 7        | 200.0727                            | [M-H] <sup>-</sup> | C <sub>12</sub> H <sub>10</sub> NO <sub>2</sub> <sup>-</sup>                 | 200.0717              | 7.46                 | ~0.5–2 mg                          |
| 8        | 216.0676                            | [M-H] <sup>-</sup> | C <sub>12</sub> H <sub>10</sub> NO <sub>3</sub> <sup>-</sup>                 | 216.0666              | 5.98                 | ~0.5–2 mg                          |
| 11       | 210.0772                            | [M-H] <sup>-</sup> | C <sub>10</sub> H <sub>12</sub> NO <sub>4</sub> <sup>-</sup>                 | 210.0772              | 1.71                 |                                    |
| 12       | 208.0615                            | [M-H] <sup>-</sup> | C <sub>10</sub> H <sub>10</sub> NO <sub>4</sub> <sup>-</sup>                 | 208.0165              | 1.38                 |                                    |
| 18       | 293.0565                            | [M-H] <sup>-</sup> | C <sub>16</sub> H <sub>9</sub> N <sub>2</sub> O <sub>4</sub> <sup>-</sup>    | 293.0568              | 5.46                 | ~1–5 mg                            |
| 21       | 343.0941                            | [M-H] <sup>-</sup> | C <sub>17</sub> H <sub>15</sub> N <sub>2</sub> O <sub>6</sub> <sup>-</sup>   | 343.0936              | 4.31                 |                                    |
| 22       | 337.0473                            | [M-H] <sup>-</sup> | C <sub>17</sub> H <sub>9</sub> N <sub>2</sub> O <sub>6</sub> <sup>-</sup>    | 337.0466              | 5.13                 |                                    |

\*Numbers indicate estimated production of each compound prior to sample treatment, where significant losses are incurred at each chromatographic step.

**Supplementary Table 2. Predicted homologs of *fsqB*, *fsqC*, and *fsqG* that are clustered in other *Aspergilli*.**

| Protein                 | Identity* (%) to genes of |                       |                  |                  | Putative function             |
|-------------------------|---------------------------|-----------------------|------------------|------------------|-------------------------------|
|                         | <i>N. fischeri</i>        | <i>A. parasiticus</i> | <i>A. oryzae</i> | <i>A. flavus</i> |                               |
| <i>A. fumigatus</i> 293 |                           |                       |                  |                  |                               |
| <i>fsqB</i>             | 474/497<br>(95%)          | 234/501<br>(47%)      | 232/501<br>(46%) | 228/501<br>(46%) | FAD binding domain protein    |
| <i>fsqC</i>             | 338/365<br>(93%)          | 157/321<br>(49%)      | 160/343<br>(47%) | 158/325<br>(49%) | methyltransferase             |
| <i>fsqG</i>             | 557/598<br>(93%)          | 329/619<br>(53%)      | 326/619<br>(53%) | 330/619<br>(53%) | cytochrome P450 monooxygenase |

\*Percentage similarity values of the *A. fumigatus* 293 ORFs to *N. fischeri*, *A. parasiticus*, *A. oryzae*, and *A. flavus* clusters are given in parentheses.

**Supplementary Table 3. Amino acid sequence of polyhistidine-tagged FsqB and software-aided<sup>1</sup> identification of tryptic FsqB peptides analyzed with UHPLC-MS/MS.**

MGSSHHHHHHSSGLVPRGSHMSIPNSFIIVGSGVFGLSLAYALSLDDRFADKKIILVDRWNFEPPNATGSVHNPAAN  
 ADTSRVIRRDYPHGPYASLALAMKHWKGFGENNRYVNQRLLFSGEGSSLTPPKALETVNYIKKAYAISCELTPGG  
 RDAVQVLDLDEVRFLGNTPSHPPHLPVNDPAARDLRGYVSNDCGWADAGASIEWLRQEVRLGRVECVVGEVE  
 SLVYSDDQRAVKGVKLVLDGKVLTAELTVIAAGARSSHILGIPKLCVYSEFVAYIQLTKEEADELRRRQWPILVNCHR  
 VFAVGPDHDNCLKFGHFSYSGIVDVLREASIQVTRPDGWEAQQKYWSDPRFAFGGEVKVSALGDVDDYENPAAQR  
 ALADYRLFLELLGPTGLQGVDTLGLDQSDNLLNNIANRPFTRVRKWCWYNDTPALDFVVDYHPSYGKTLFVATGGCD  
 HAFKFLPIIGKTLALILNRGDSAVSLPAGVEPSLEELSELWRFPVELLQDN

| Peptide                                    | observed  | expected  | z | $\Delta$  |
|--------------------------------------------|-----------|-----------|---|-----------|
| MGSSHHHHHHSSGLVPR                          | 590.2879  | 633.9679  | 3 | -131.0400 |
| GSHMSIPNSFIIVGSGVFGLSLAYALSLDDRFADKKIILVDR | 1075.2218 | 1075.2200 | 3 | 0.0254    |
| WNFEPPNATGSVHNPAANADTSR                    | 842.0560  | 842.0509  | 3 | -0.0066   |
| DYPHGPYASLALAMK                            | 881.9266  | 881.9198  | 2 | -0.0010   |
| FGENNR                                     | 736.3424  | 736.3373  | 1 | 0.0051    |
| LLFSGEGSSLTPPK                             | 767.4106  | 767.4043  | 2 | -0.0020   |
| ALETVNYIK                                  | 1050.5813 | 1050.5757 | 1 | -0.0017   |
| AYAISCELTPGGR                              | 697.8393  | 697.8330  | 2 | -0.0020   |
| DAVQVLDLDEVR                               | 1458.7411 | 1458.7362 | 1 | -0.0024   |
| FLGNTPSHPPHLPVNK                           | 457.2478  | 457.2409  | 4 | -0.0015   |
| GYVSNDCGWADAGASIEWLR                       | 1113.9964 | 1113.9900 | 2 | -0.0018   |
| VECVVGEVESLVYSDDQR                         | 1041.9851 | 1041.9788 | 2 | -0.0020   |
| VLTAELTVIAAGAR                             | 462.2763  | 462.2695  | 3 | -0.0014   |
| SSHILGIPK                                  | 951.5615  | 951.5549  | 1 | -0.0007   |
| LCDVYSEFVAYIQLTK                           | 974.9887  | 974.9826  | 2 | -0.0023   |
| EEADELR                                    | 431.2024  | 431.1938  | 2 | 0.0027    |
| QWPILVNCHR                                 | 661.8428  | 661.8357  | 2 | -0.0003   |
| GVFAVGPDHDNCLK                             | 764.8631  | 764.8570  | 2 | -0.0024   |
| FGHFSYSGIVDVL                              | 798.9108  | 798.9048  | 2 | -0.0026   |

|                                     |           |           |   |          |
|-------------------------------------|-----------|-----------|---|----------|
| EASIQVPTRPDGWEAQK                   | 1020.5093 | 1020.5036 | 2 | -0.0032  |
| YWSDPR                              | 412.1909  | 412.1903  | 2 | 0.0012   |
| FAFGGEVK                            | 854.4397  | 854.4334  | 1 | -0.0009  |
| VSALGDVDDYENPAAQR                   | 910.4254  | 910.4192  | 2 | -0.0022  |
| LFLELLGPTGLQGVDLGLDQSDNLLNNIANRPFTR | 1346.7254 | 1346.7195 | 3 | -0.0042  |
| KCWYNDTPALDFVVDYHPSYGK              | 1134.4530 | 892.7407  | 3 | 725.1369 |
| TLFVATGGCDHAFK                      | 762.3686  | 762.3620  | 2 | -0.0013  |
| FLPIIGEK                            | 916.5490  | 916.5429  | 1 | -0.0012  |
| TLALILR                             | 799.5390  | 799.5327  | 1 | -0.0009  |
| GDSAVSLPAGVEPSLEELSELWR             | 1221.1133 | 1221.1061 | 2 | -0.0002  |
| FPVELLQDN                           | 1074.5451 | 1074.5393 | 1 | -0.0015  |
|                                     |           |           |   |          |
| KC(FAD)WYNDTPALDFVVDYHPSYGK         | 1134.4530 | 1134.4454 | 3 | 0.0009   |



**Supplementary Table 4. Fungal strains and plasmids used in this study**

| Strain/plasmid                                               | Description                                                           | Reference  |
|--------------------------------------------------------------|-----------------------------------------------------------------------|------------|
| <b><i>Aspergillus fumigatus</i> 293 background strains</b>   |                                                                       |            |
| Af293                                                        | Wild type                                                             | 2          |
| Af293.1                                                      | <i>pyrG1</i>                                                          | 2          |
| Af293.6                                                      | <i>pyrG1, argB1</i>                                                   | 2          |
| TJES1.18                                                     | <i>A.fargB::gpdA(p)::fsqA, pyrG1</i>                                  | This study |
| TJES2.20                                                     | $\Delta$ <i>fsqA::A.ppyrG, argB1</i>                                  | This study |
| TJES3.1                                                      | <i>A.fargB::gpdA(p)::fsqA, A.ppyrG</i>                                | This study |
| TJES4.10                                                     | <i>A.fargB::gpdA(p)::fsqA, <math>\Delta</math>fsqF::A.ppyrG</i>       | This study |
| TJES8.2                                                      | $\Delta$ <i>fsqA::A.ppyrG, A.fargB</i>                                | This study |
| TJES13.61                                                    | <i>A.fargB::gpdA(p)::fsqA, <math>\Delta</math>fsqB::A.ppyrG</i>       | This study |
| TJES14.68                                                    | <i>A.fargB::gpdA(p)::fsqA, <math>\Delta</math>fsqC::A.ppyrG</i>       | This study |
| TJES15.91                                                    | <i>A.fargB::gpdA(p)::fsqA, <math>\Delta</math>fsqG::A.ppyrG</i>       | This study |
| <b><i>Aspergillus flavus</i> NRRL3357 background strains</b> |                                                                       |            |
| NRRL3357.5                                                   | <i>pyrG1</i>                                                          | 3          |
| TJW149.27                                                    | $\Delta$ <i>ku70::pyrG</i>                                            | This study |
| TJES19.1                                                     | $\Delta$ <i>pyrG, <math>\Delta</math>ku70</i>                         | This study |
| TJES 23.3                                                    | <i>A.ppyrG::gpdA(p)::imqA, <math>\Delta</math>ku70</i>                | This study |
| TJES 27.1                                                    | $\Delta$ <i>imqA::A.ppyrG, <math>\Delta</math>ku70</i>                | This study |
| <b>Plasmids</b>                                              |                                                                       |            |
| pJMP4                                                        | <i>A. fumigatus argB</i>                                              | 4          |
| pJMP8.1                                                      | <i>A. nidulans gpdA</i> promoter (truncated to 1.5 kb) in pBluescript | 5          |
| pJMP9.1                                                      | <i>A. nidulans gpdA(p) + A parasiticus pyrG</i>                       | 6          |
| pJES1.2                                                      | <i>gpdA(p)::fsqA</i> in pJMP8.1                                       | This study |
| pJES2.7                                                      | <i>A. fumigatus argB::gpdA(p)::fsqA</i>                               | This study |
| pJES13.2                                                     | C-terminal 6His tagged <i>fsqF</i> A-domain in pET30a vector          | This study |
| pJW24                                                        | <i>A parasiticus pyrG</i> in pBluescript                              | 7          |

pXX = plasmid, TXX = original transformant

**Supplementary Table 5. PCR primer sets used in this study**

| Name of the primer    | Oligonucleotide sequence (5'-3')                       | Uses                                            |
|-----------------------|--------------------------------------------------------|-------------------------------------------------|
| Afu6g03380_FOR_Nprobe | CTTTCACGTGGACACTGCGC                                   | Northern probe                                  |
| Afu6g03380_REV_Nprobe | TACTGCTCCAACCAGCACCG                                   | Northern probe                                  |
| Afu6g03390_FOR_Nprobe | TCAGGGAGATATGGTGGCG                                    | Northern probe                                  |
| Afu6g03390_REV_Nprobe | CAACGCAGCAGGTAGTCACG                                   | Northern probe                                  |
| Afu6g03400_FOR_Nprobe | CTTCCAAGCCCAACAAGCC                                    | Northern probe                                  |
| Afu6g03400_REV_Nprobe | AATCTCGTAGGCCTCCAGCG                                   | Northern probe                                  |
| Afu6g03430_FOR_Nprobe | TGGCCTATCACACCAGTGGC                                   | Northern probe                                  |
| Afu6g03430_REV_Nprobe | GTGCAGCCTGAATCTCACGG                                   | Northern probe                                  |
| Afu6g03420_FOR_Nprobe | GAGCTCGACAATGGTGAGCG                                   | Northern probe                                  |
| Afu6g03420_REV_Nprobe | CAATCACATCGGCATGCGG                                    | Northern probe                                  |
| Afu6g03440_FOR_Nprobe | GATGGAACTTCGAGCCACCC                                   | Northern probe                                  |
| Afu6g03440_REV_Nprobe | GCGGATAATCTGCCAACGCC                                   | Northern probe                                  |
| Afu6g03450_FOR_Nprobe | CTACATCGCCTGCGATGTGG                                   | Northern probe                                  |
| Afu6g03450_REV_Nprobe | TAGCACACGCGCCAGATACC                                   | Northern probe                                  |
| Afu6g03460_FOR_Nprobe | GCGACTTCGCGACTCGGAAT                                   | Northern probe                                  |
| Afu6g03460_REV_Nprobe | CCATCACAAACTCGGTCCCG                                   | Northern probe                                  |
| Afu6g03470_FOR_Nprobe | AACTGCGCTCCAAAACCGCC                                   | Northern probe                                  |
| Afu6g03470_REV_Nprobe | ATCCACAAGGGCGATCTGGC                                   | Northern probe                                  |
| Afu6g03490_FOR_Nprobe | GTTTCTCAGGGGATGTGACCG                                  | Northern probe                                  |
| Afu6g03490_REV_Nprobe | ACAAGTTCGCCCTTCGCTCCG                                  | Northern probe                                  |
| Afu6g03500_FOR_Nprobe | GGTGCTCAAGGAACAGAGGG                                   | Northern probe                                  |
| Afu6g03500_REV_Nprobe | GCCAAGAGGTCATTCTGCC                                    | Northern probe                                  |
| Afu6g03510_FOR_Nprobe | AACACCCGATACCAGCTCGC                                   | Northern probe                                  |
| Afu6g03510_REV_Nprobe | ATGGGCCACCCATTGATGGC                                   | Northern probe                                  |
| Afu6g03520_FOR_Nprobe | ATGCCATCATCACCGGTGCC                                   | Northern probe                                  |
| Afu6g03520_REV_Nprobe | CGAGCATGGACAATAGCC                                     | Northern probe                                  |
| A.ppyrG_T7 FOR        | CGTAATACGACTCACTATAGGG                                 | Amplification of A.ppyrG from pJMP9.1           |
| A.ppyrGR_Rev          | ATTCGACAATCGGAGAGGCTGC                                 | Amplification of A.ppyrG from pJMP9.1           |
| Afu6g03430_3'F_flank  | CTGTCGCTGCAGCCTCTCCGATTGTCG<br>AATGCTTCAGCTGGAGTGTCTCC | Amplification of <i>fsqA</i> 3' flanking region |
| Afu6g03430_3'R_flank  | TACAGCGACGACCAACGAGC                                   | Amplification of <i>fsqA</i> 3' flanking region |
| Afu6g03430_5'F_flank  | TAAGAGCGGAGACTGGTGGC                                   | Amplification of <i>fsqA</i> 5' flanking region |
| Afu6g03430_5'R_flank  | CCAATTCGCCCTATAGTGAGTCGTATT<br>ACGTCTGCAAGGGTTTACGAGGG | Amplification of <i>fsqA</i> 5' flanking region |
| Afu6g03440_3'F_flank  | CTGTCGCTGCAGCCTCTCCGATTGTCG<br>AATTCGGA ACTCTGGAGTTCCC | Amplification of <i>fsqB</i> 3' flanking region |
| Afu6g03440_3'R_flank  | ACTGCGCGACAAATGCAGCC                                   | Amplification of <i>fsqB</i> 3' flanking region |
| Afu6g03440_5'F_flank  | GTCTCGTCACTTACCCTGCC                                   | Amplification of <i>fsqB</i> 5'                 |

|                      |                                                                    |                                                                    |
|----------------------|--------------------------------------------------------------------|--------------------------------------------------------------------|
|                      |                                                                    | flanking region                                                    |
| Afu6g03440_5'R_flank | CCAATTCGCCCTATAGTGAGTCGTATT<br>ACGAAAGAGACAGCCGGGATCCG             | Amplification of <i>fsqB</i> 5'<br>flanking region                 |
| Afu6g03450_3'F_flank | CTGTCGCTGCAGCCTCTCCGATTGTCG<br>AATCTTGCTGCGGAAATCGAGCG             | Amplification of <i>fsqC</i> 3'<br>flanking region                 |
| Afu6g03450_3'R_flank | CACGGTAAAAGCCCAGTCCG                                               | Amplification of <i>fsqC</i> 3'<br>flanking region                 |
| Afu6g03450_5'F_flank | GATGTAGGCCACGAACTCGC                                               | Amplification of <i>fsqC</i> 5'<br>flanking region                 |
| Afu6g03450_5'R_flank | CCAATTCGCCCTATAGTGAGTCGTATT<br>ACGAGGATGCCAAAAGCCCACCG             | Amplification of <i>fsqC</i> 5'<br>flanking region                 |
| Afu6g03480_3'F_flank | CTGTCGCTGCAGCCTCTCCGATTGTCG<br>AATCGCGGGCATCTAGTATTCGG             | Amplification of <i>fsqF</i> 3'<br>flanking region                 |
| Afu6g03480_3'R_flank | ACTTGCGCAACCAGCTGTGC                                               | Amplification of <i>fsqF</i> 3'<br>flanking region                 |
| Afu6g03480_5'F_flank | GAATCTGAGCGCTTGTGCGG                                               | Amplification of <i>fsqF</i> 5'<br>flanking region                 |
| Afu6g03480_5'R_flank | CCAATTCGCCCTATAGTGAGTCGTATT<br>ACGAAGAAAGGCGAAACGGAGCG             | Amplification of <i>fsqF</i> 5'<br>flanking region                 |
| Afu6g03490_3'F_flank | CTGTCGCTGCAGCCTCTCCGATTGTCG<br>AATATGGACTCCAGTCAGGACCG             | Amplification of <i>fsqG</i> 3'<br>flanking region                 |
| Afu6g03490_3'R_flank | ATCCACCTCGTGGAGAAGCC                                               | Amplification of <i>fsqG</i> 3'<br>flanking region                 |
| Afu6g03490_5'F_flank | TGTGTCACGAAGGCAGTGCG                                               | Amplification of <i>fsqG</i> 5'<br>flanking region                 |
| Afu6g03490_5'R_flank | CCAATTCGCCCTATAGTGAGTCGTATT<br>ACGGTGCCCATCGTCCAATACGG             | Amplification of <i>fsqG</i> 5'<br>flanking region                 |
| fqsF_Adomain_xp_5'F  | AATAAG <b>CGGCGC</b> ACCTGGAACACCG<br>TGGTTGC                      | Amplification of <i>fsqF</i> A-<br>domain ( <b>NotI cut site</b> ) |
| fqsF_Adomain_xp_3' R | ATTAGC <b>CTCGAG</b> TTCGTTGCCCGAGT<br>GTGC                        | Amplification of <i>fsqF</i> A-<br>domain ( <b>XhoI cut site</b> ) |
| fsqD_xp_5' F         | GTAGGCTA <b>GAATTC</b> CACACCAGCCTC<br>TCTTGCC                     | Amplification of <i>fsqD</i><br>ORF ( <b>EcoRI cut site</b> )      |
| fsqD_xp_3' R         | CATTAT <b>AAGCTT</b> GAGAAAGGAGTAGC<br>GGACCTCTTCCC                | Amplification of <i>fsqD</i><br>ORF ( <b>HindIII cut site</b> )    |
| Afu6g03430_NcoI_FOR  | CAGAT <b>CCATGG</b> ACGACAAGCATGGC<br>C                            | Amplification of <i>fsqA</i><br>ORF ( <b>NcoI cut site</b> )       |
| Afu6g03430_NotI_REV  | GCAACC <b>CGGCGC</b> CAGACAGCGCGGT<br>ATCACTG                      | Amplification of <i>fsqA</i><br>ORF ( <b>NotI cut site</b> )       |
| flvku70F5            | ACATCTCTCCGTCAAAGGCGC                                              | Amplification of <i>ku70</i><br>5' flanking region                 |
| flavku70R5           | CGATATCAAGCTATCGATACCTCGACT<br>CTGTGTTGAGAGTCGTAAGTCATGAAT<br>TGCG | Amplification of <i>ku70</i><br>5' flanking region                 |
| flvku70F3            | GTCGCTGCAGCCTCTCCGATTGTCGAA<br>TGACAACGCTAGTATTGGTTACGAGAG         | Amplification of <i>ku70</i><br>3' flanking region                 |

|                   |                                                                      |                                                    |
|-------------------|----------------------------------------------------------------------|----------------------------------------------------|
| flavku70R3        | ACAG<br>AGAATGGCTACGTCAACCTCCG                                       | Amplification of <i>ku70</i><br>3' flanking region |
| Fku70IF           | ATGAGGAAGAGGAGGAGACCG                                                | Amplification of $\Delta ku70$<br>cassette         |
| Fku70IR           | CACTTTTCAATCGTGCGAGCCG                                               | Amplification of $\Delta ku70$<br>cassette         |
| pet28_fsqB_3'_fwd | <u>TGGTGCCGCGCGGCAGCCATATGTC</u><br><u>TATCCCTAACTCTTTCATCATTGT</u>  | Amplification of fsqB,<br>pET28b+ 3' destination   |
| fsqB_5'_pet28_rev | <u>CTCAGCTTCCTTCGGGCTTTGTTACTA</u><br><u>GTTGTCCTGTAGTAGTTCCACGG</u> | Amplification of fsqB<br>pET28b+ 5' destination    |

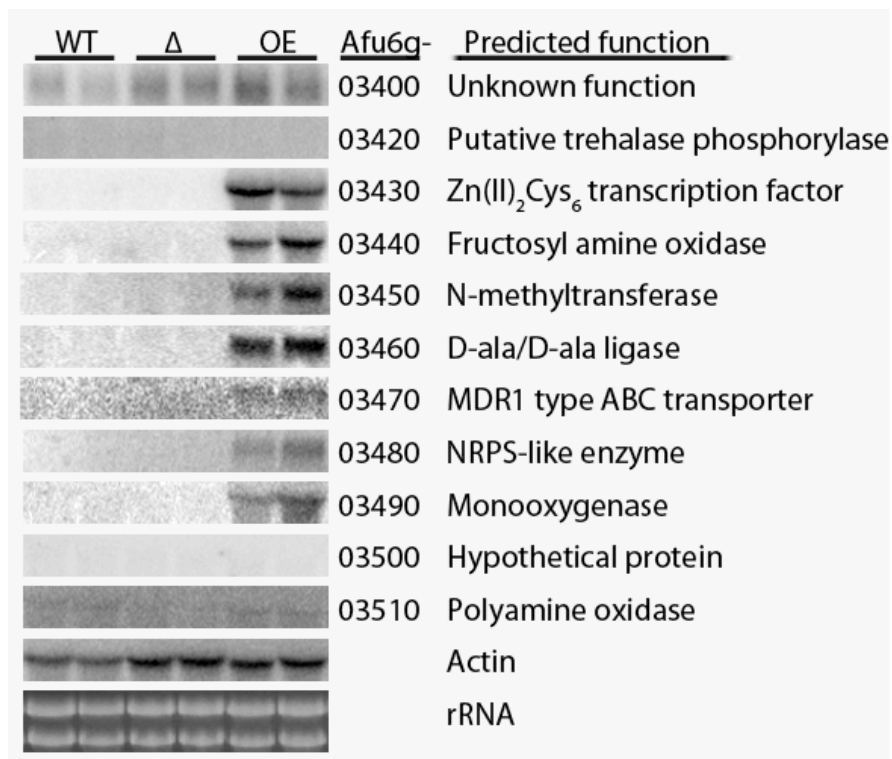

**Supplementary Figure 1. Northern blot analysis of WT (Af293) left,  $\Delta fsqA$  middle, and OE::*fsqA*, right.** Overexpression of *fsqA* causes specific up-regulation of AFUA6g\_03430 – AFUA6g\_03490, defining the boundaries of the *fsq* cluster.

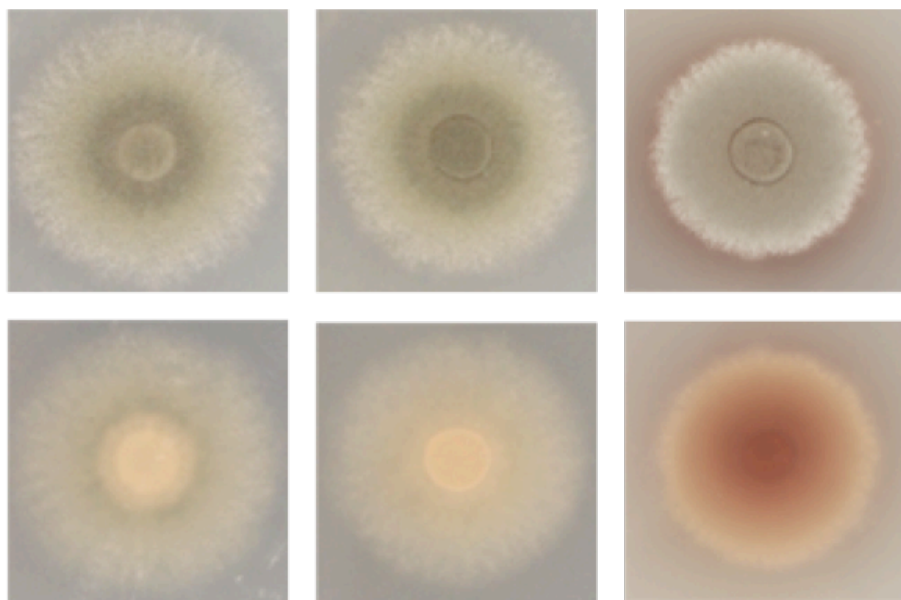

**Supplementary Figure 2. Phenotype of WT (Af293) left,  $\Delta fsqA$  middle, and OE::*fsqA* right grown on GMM at 37°C for 72 hours. OE::*fsqA* decreases radial growth and shows characteristic brown pigmentation diffusing into the media.**

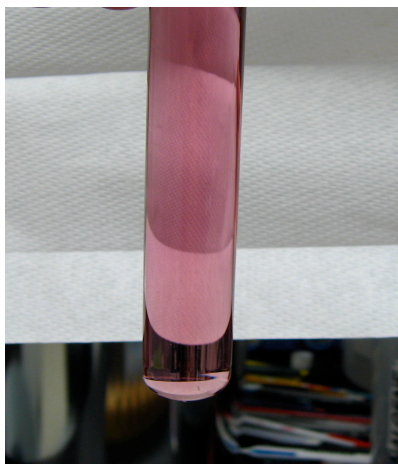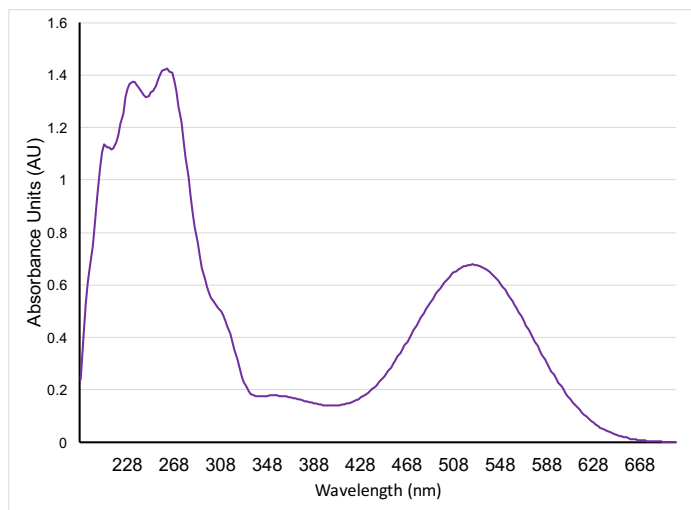

**Supplementary Figure 3. Color of fumisoquin C.** Photograph of a test tube (18 x 150 mm) from large-scale reverse-phase chromatography containing ~0.02 mg/mL of fumisoquin C, **3**, (left) and UV-Vis spectrum from HPLC-UV-MS analysis (right).

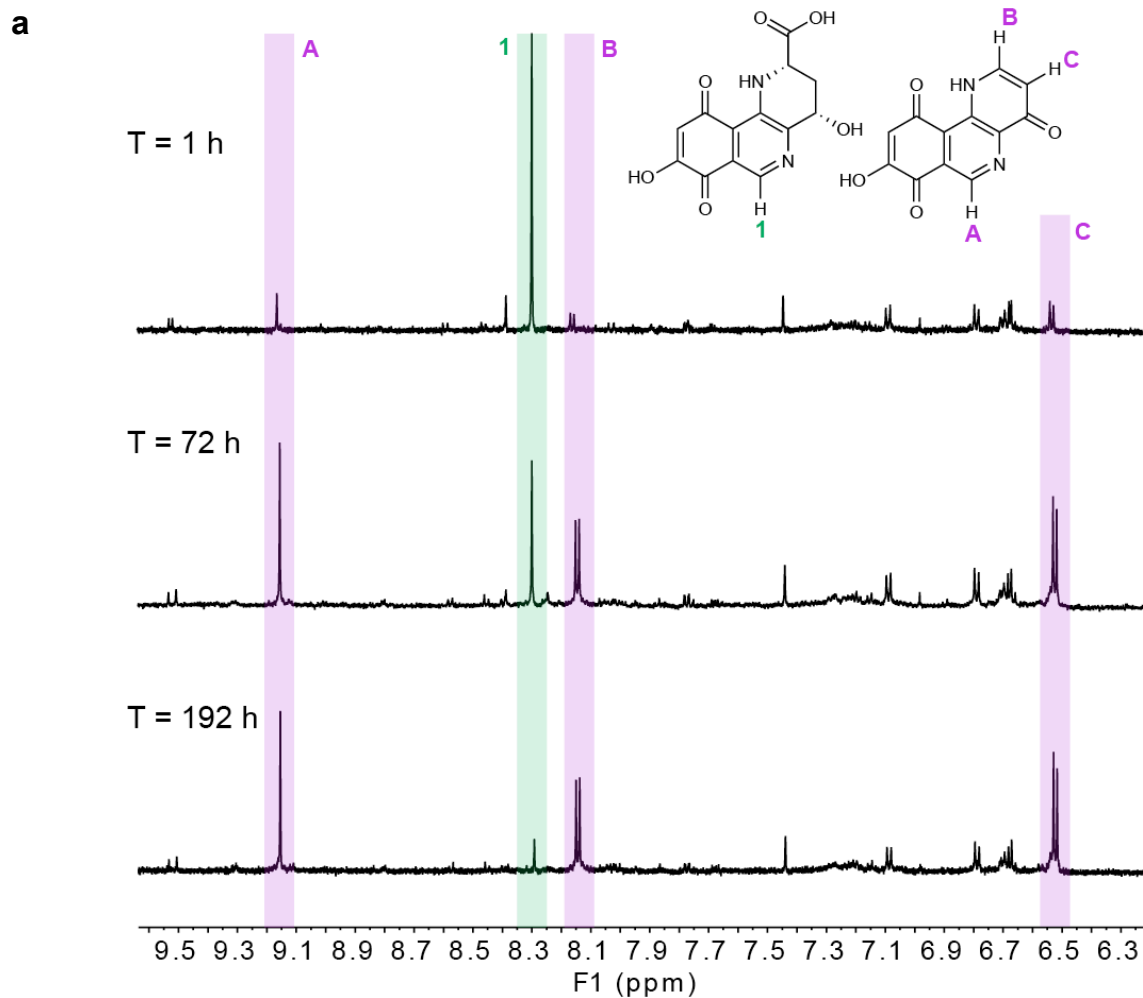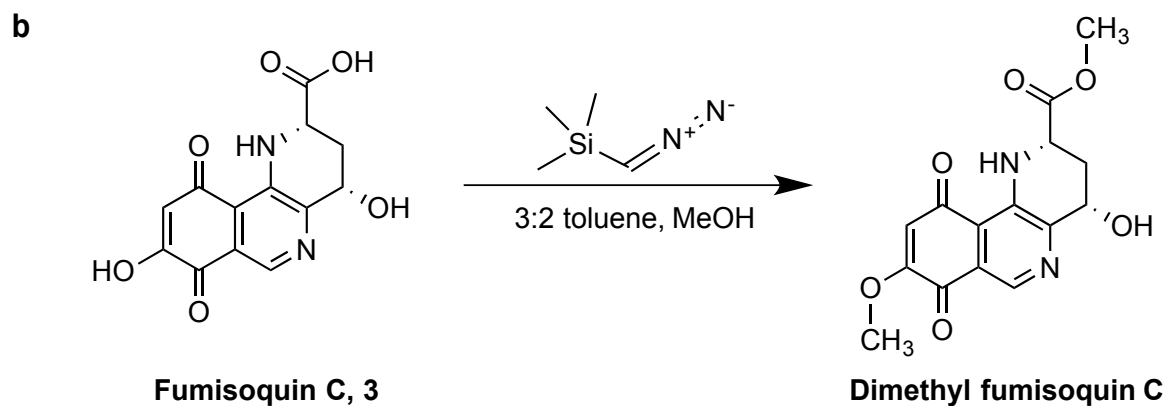

**Supplementary Figure 4. Fumisoquin C decomposition and derivatization.** (a)  $^1\text{H}$  NMR spectra in  $\text{CD}_3\text{OD}$  at T = 2 h (top), T = 72 h (middle), and T = 192 h (bottom) after chromatographic purification, showing conversion of fumisoquin C, **3**, into **4**. (b) Conversion of fumisoquin C (**3**) into dimethyl fumisoquin C. See Online Methods for experimental procedure.

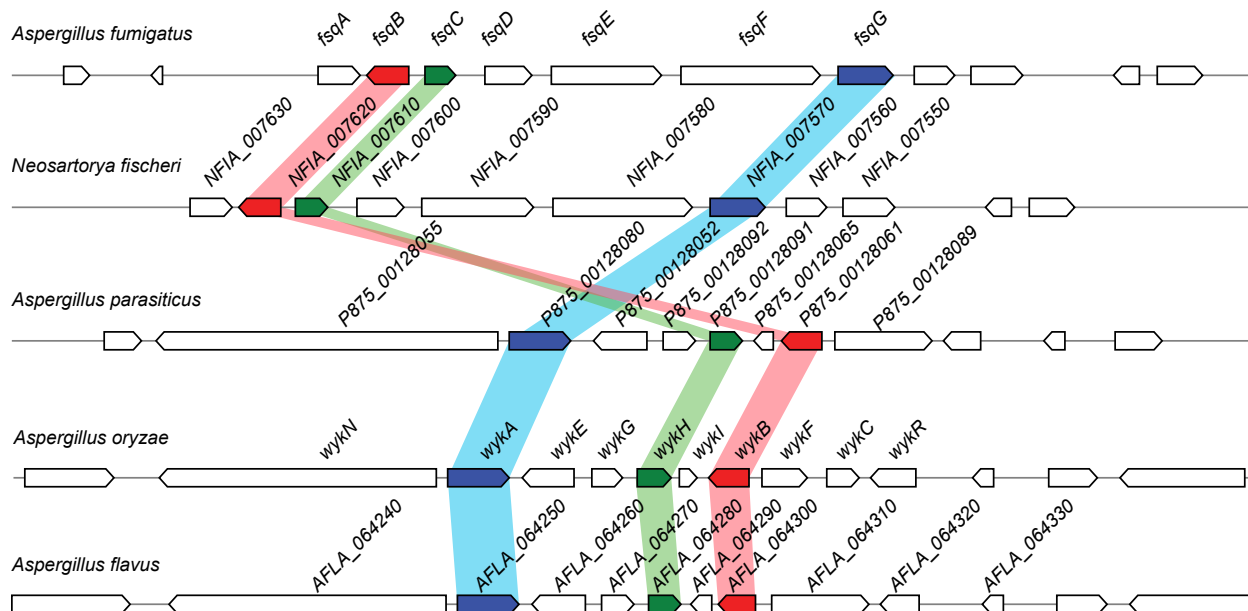

**Supplementary Figure 5. Synteny analysis of *fsq* cluster in indicated *Aspergillus* and *Neosartorya* species.** The analysis shows conservation of *fsqB* (red), *fsqC* (green), and *fsqG* (blue), which encode the enzymes responsible for the incorporation of the isoquinoline ring in **1-5**, and **18**. For % identity of these genes in each species shown, see **Supplementary Table 2**.

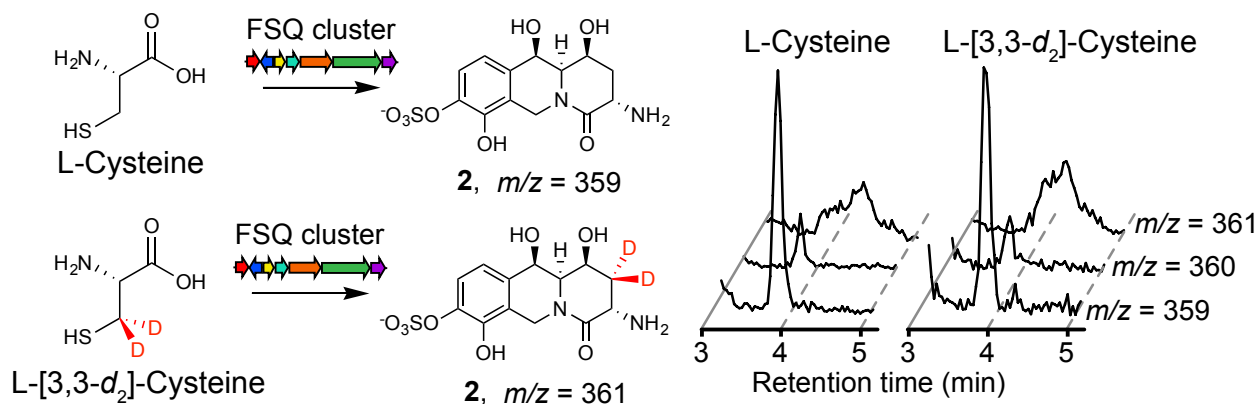

**Supplementary Figure 6. L-cysteine is not incorporated into the fumisoquins.** Ion chromatograms from HPLC-MS analysis of extracts from OE::*fsqA* fed with L-cysteine or L-[3,3- $d_2$ ]-cysteine. Indicated *m/z* values correspond to isotopomers of **2** with or without heavy atom incorporation.

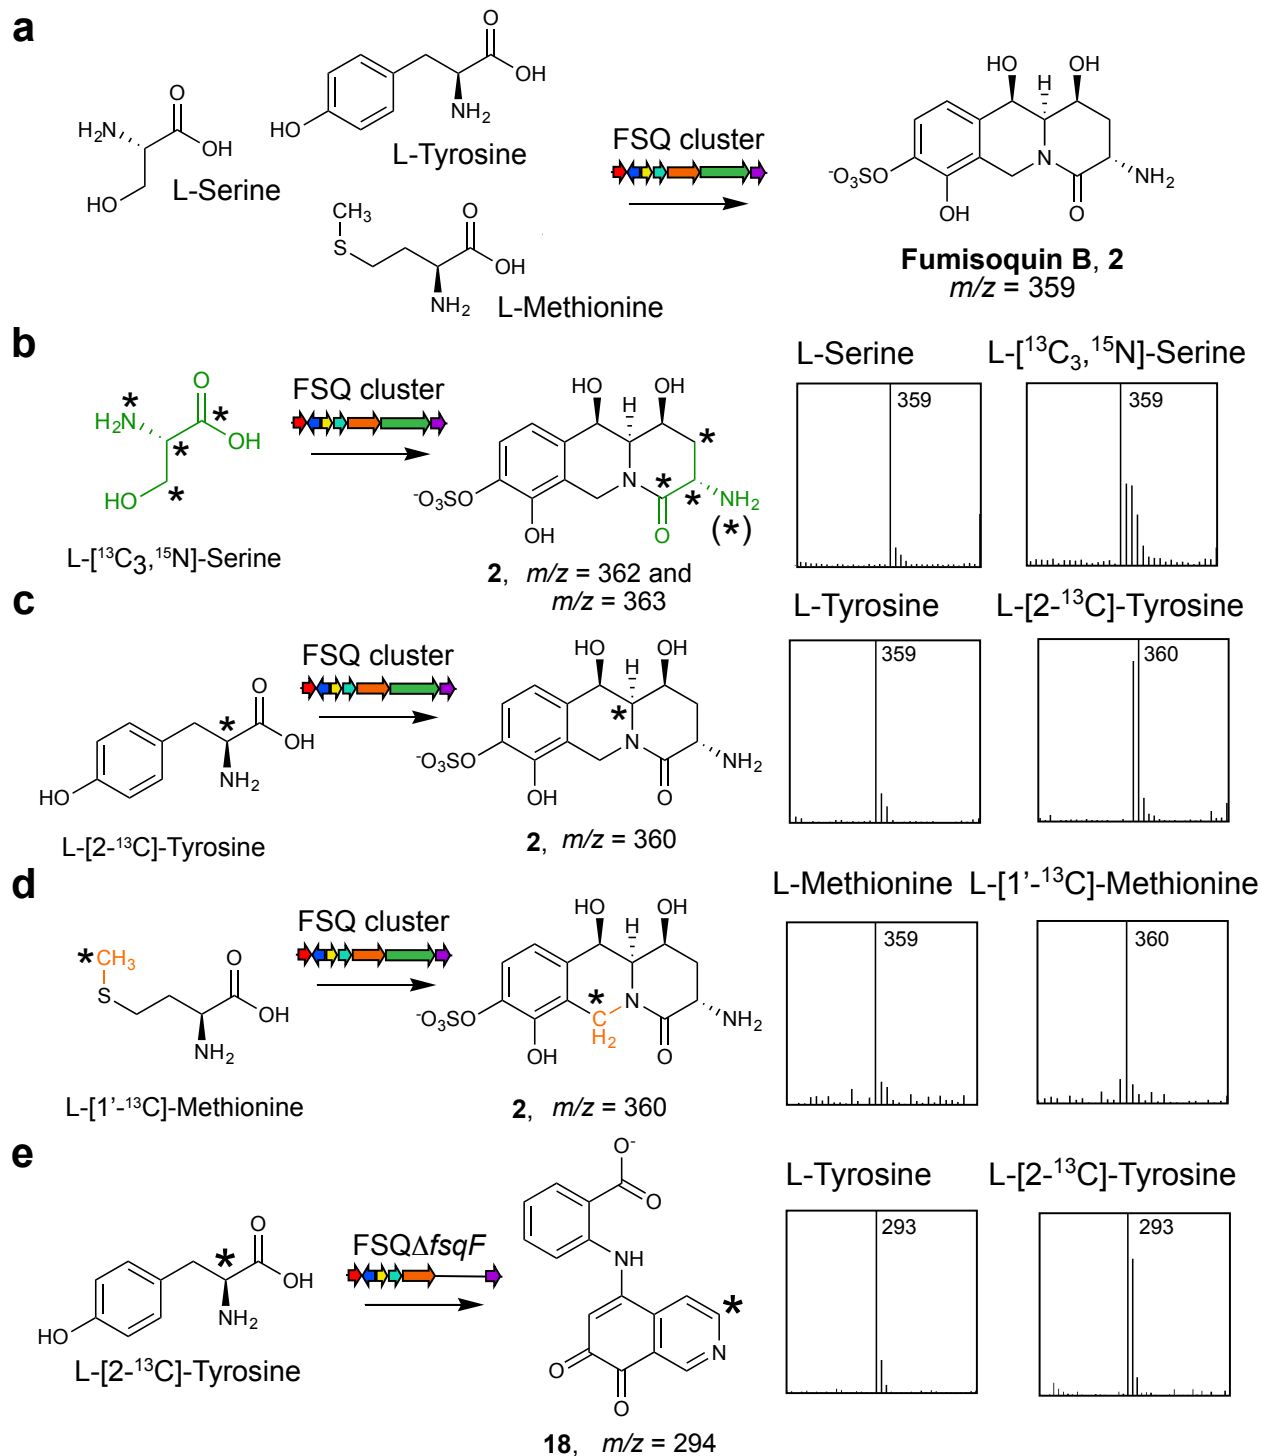

**Supplementary Figure 7. Mass spectra of FSQ cluster metabolites with and with out heavy atom incorporation.** (a) L-serine, L-tyrosine, and L-methionine are incorporated into the fumisoquins. (b) Mass spectrum of **2** with L-serine incorporated (left) and mass spectrum of **2** with L-[<sup>13</sup>C<sub>3</sub>, <sup>15</sup>N]-serine incorporated (right). Increased M+1 and M+2 peaks likely result from amination/deamination and use of abundant labeled serine for methionine production. (c) Mass spectrum of **2** with L-tyrosine incorporated (left) and mass spectrum of **2** with L-[2-<sup>13</sup>C]-tyrosine incorporated (right). (d) Mass spectrum of **2** with L-methionine incorporated (left) and mass spectrum of **2** with L-[1'-<sup>13</sup>C]-methionine incorporated (right). (e) Mass spectrum of **18** with L-tyrosine incorporated (left) and mass spectrum of **18** with L-[2-<sup>13</sup>C]-tyrosine incorporated (right).



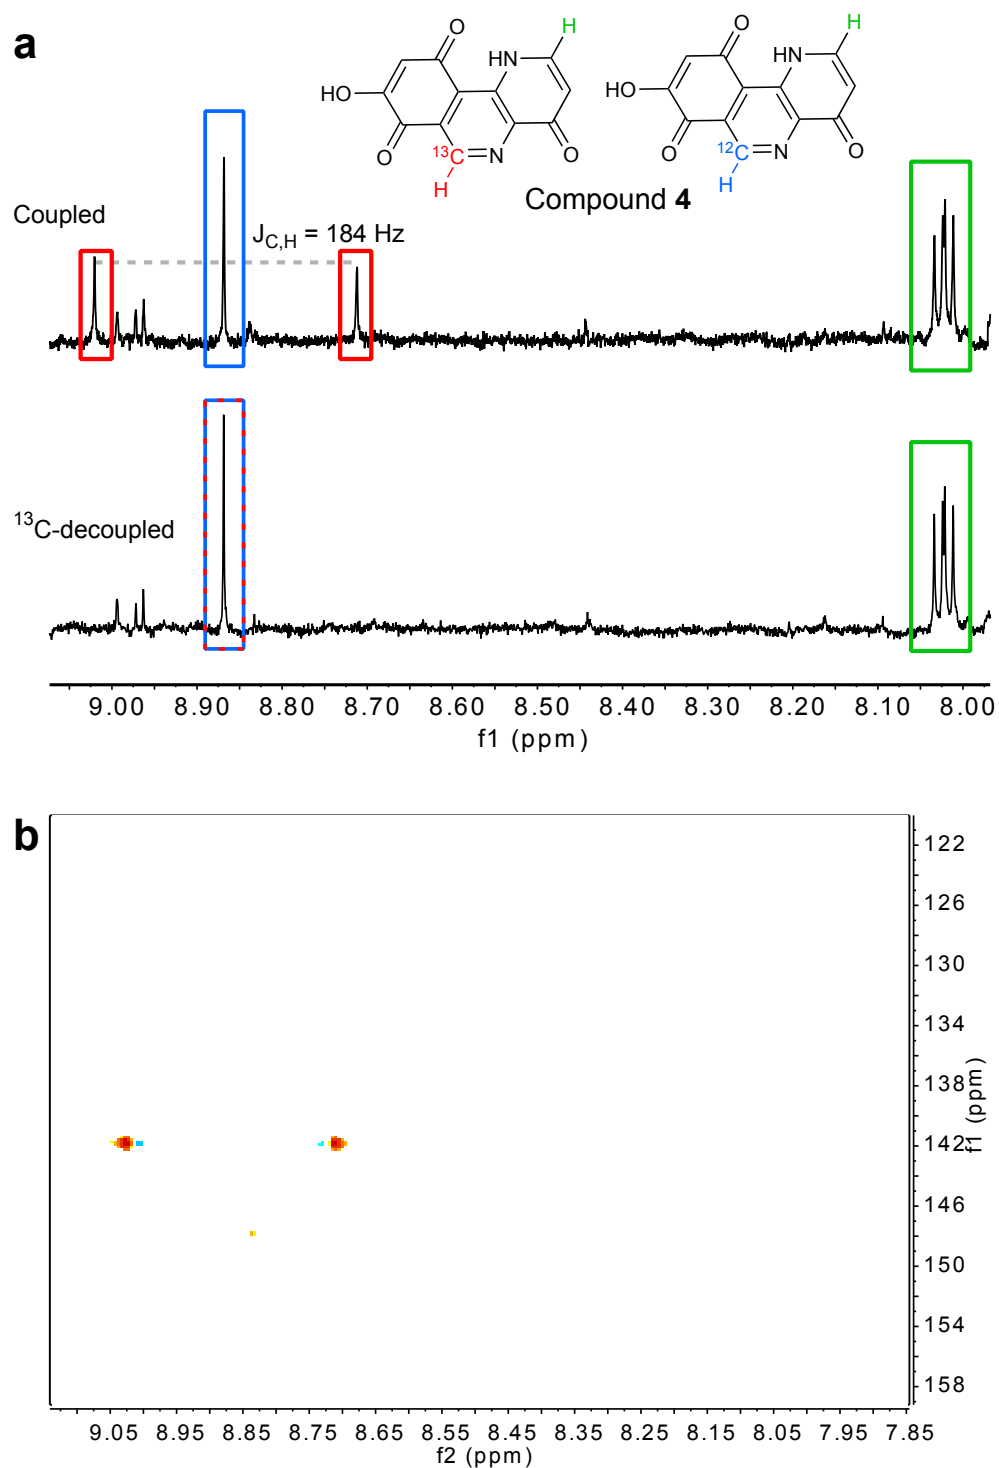

**Supplementary Figure 8. NMR spectra of  $^{13}\text{C}$ -enriched **4**** (a)  $^1\text{H}$ - $^{13}\text{C}$  coupled  $^1\text{H}$  NMR spectrum of a sample of **4** obtained from fumisoquin C (**3**) isolated from a fungal culture grown with L-[1'- $^{13}\text{C}$ ]-methionine (top) and  $^1\text{H}$ - $^{13}\text{C}$  decoupled  $^1\text{H}$  NMR spectrum of the same sample of **4** (bottom), showing selective incorporation of the methionine methyl group. In the decoupled spectrum, the intensity of the signal of the proton attached to the labeled carbon does not increase proportionally due to partial signal loss and line shape changes during decoupling. (b)  $^1\text{H}$ - $^{13}\text{C}$  coupled HSQC spectrum of this sample of **4**. Spectra were acquired using the 600 MHz Varian INOVA spectrometer, using  $\text{DMSO-}d_6$  as solvent.

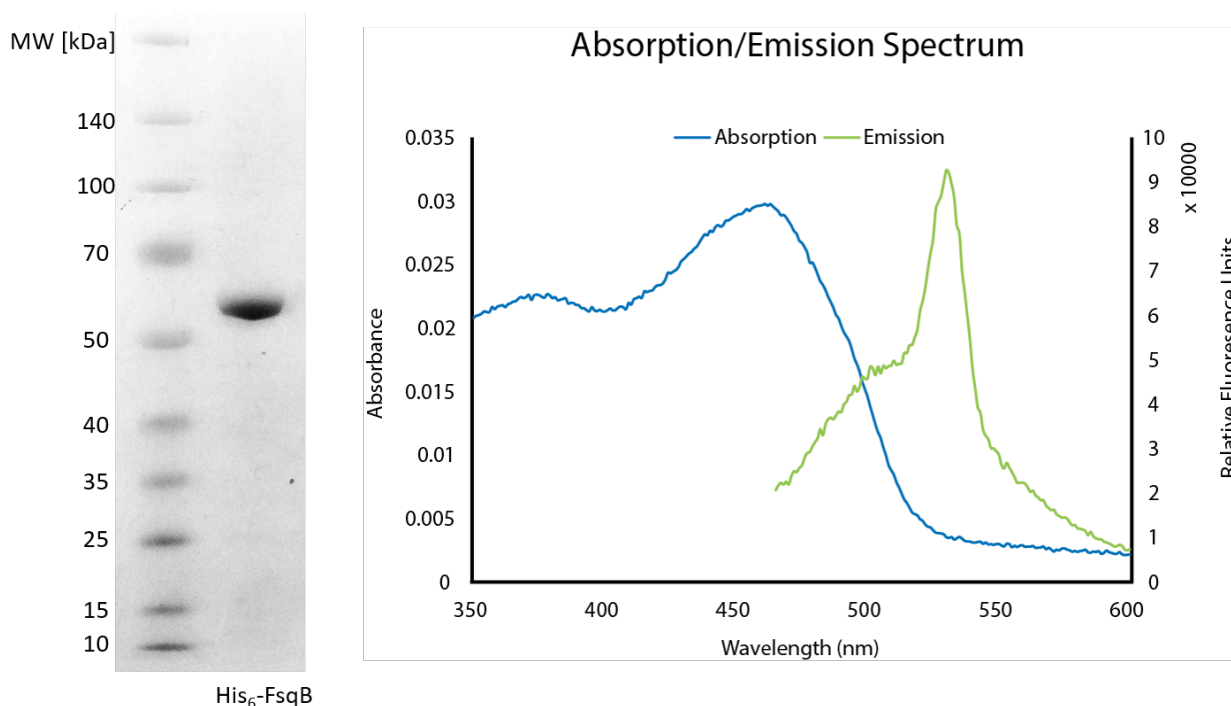

**Supplementary Figure 9. Purification and spectra of FsqB.** SDS-polyacrylamide gel of the polyhistidine-tagged FsqB (left), and UV-Vis absorption and fluorescence spectra (right) of FsqB. Spectra were acquired in 100 mM potassium phosphate buffer at pH 7.0, and fluorescence spectrum was acquired using an excitation wavelength of 450 nm.

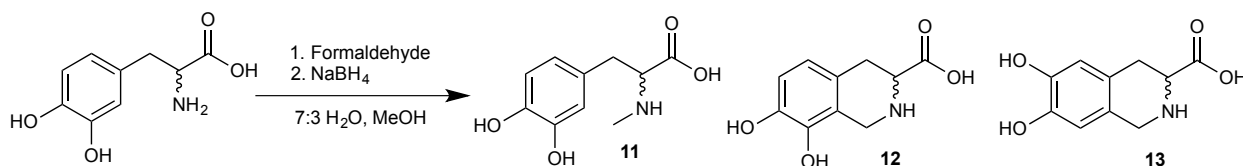

**Supplementary Figure 10.** Reaction of DL-DOPA with formaldehyde followed by addition of sodium borohydride produces a 7:3 mixture of cyclized products **12** and **13**, respectively, in addition to variable amounts of uncyclized **11**, as determined by HPLC-MS.

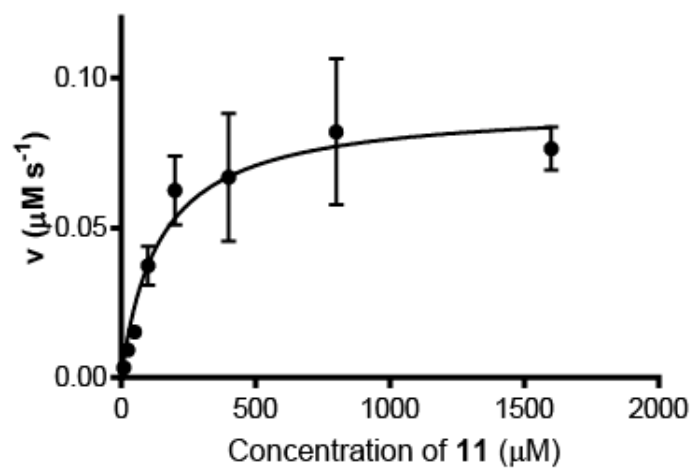

**Supplementary Figure 11. Enzymatic activity of FsqB.** Steady-state kinetics evaluated for FsqB on model substrate **11**. The observed apparent steady-state kinetic parameters of FsqB operating on **11** were  $K_M$ :  $142.5 \pm 42.9 \mu\text{M}$  and  $k_{cat}$ :  $0.9 \pm 0.1 \text{ s}^{-1}$  at  $25 \text{ }^\circ\text{C}$ . Each initial concentration of **11** was sampled twice for kinetic analysis, and displayed as the mean  $\pm$  s.d.

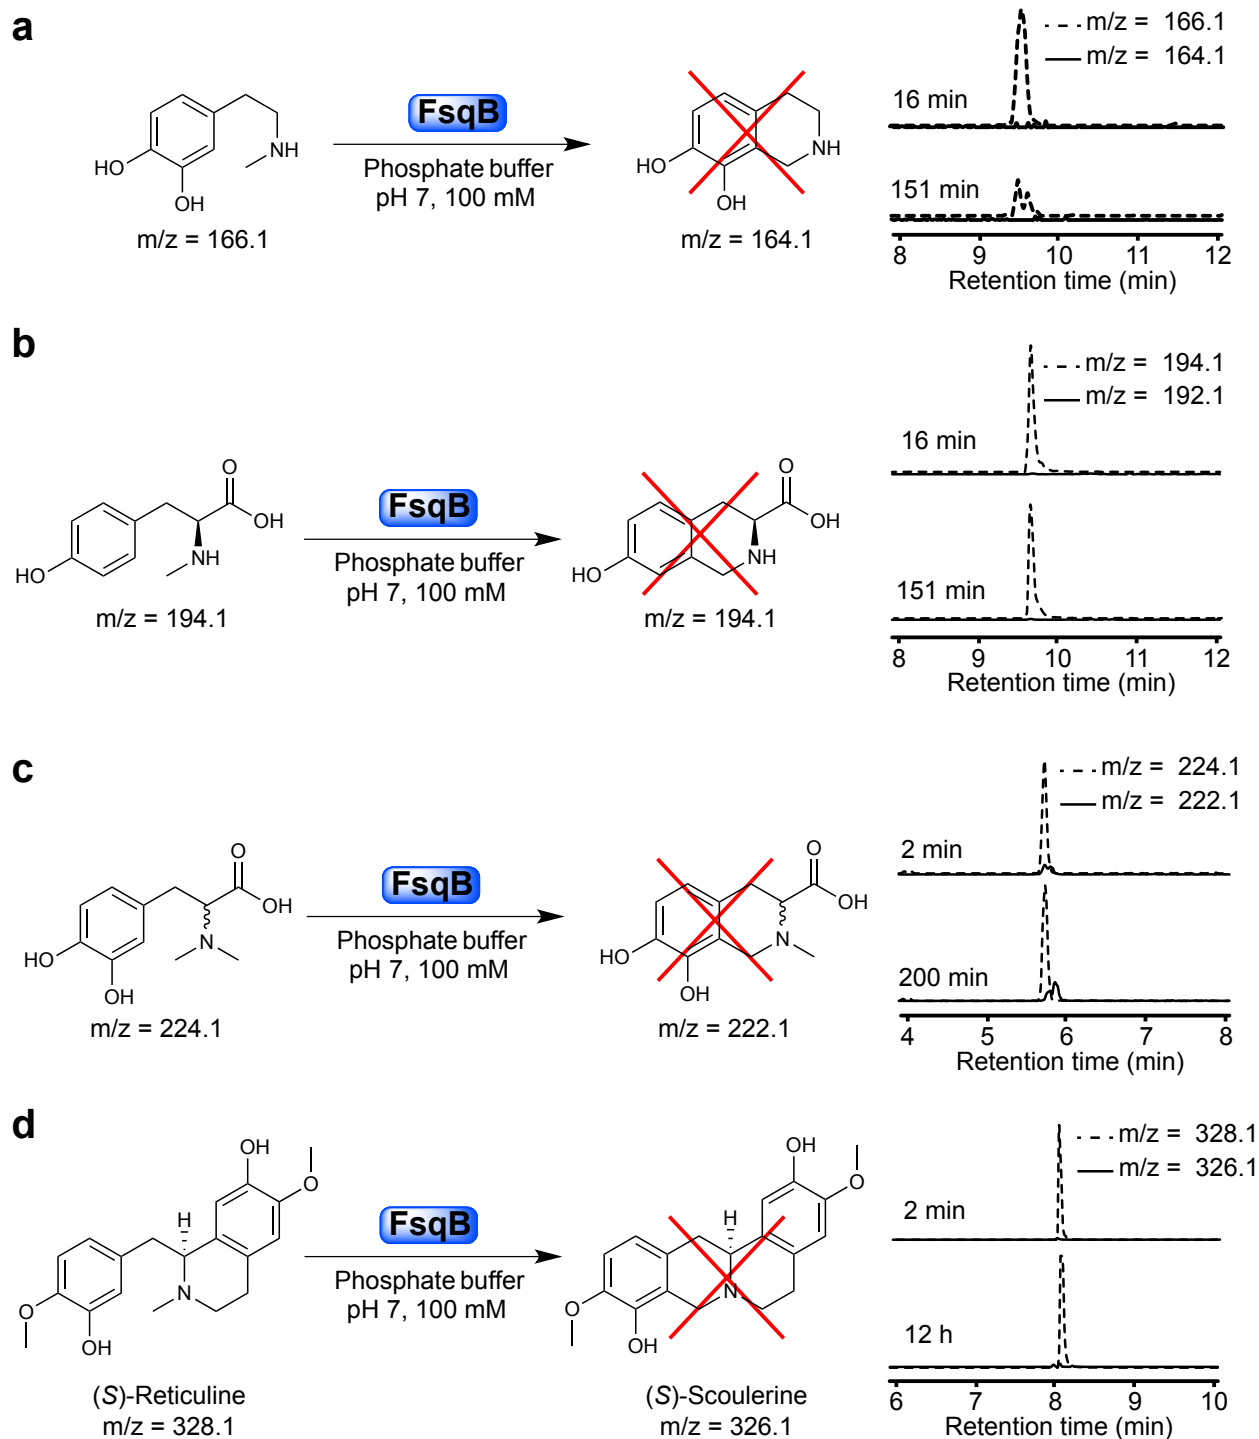

**Supplementary Figure 12. Substrate specificity of FsqB.** (a) Ion chromatograms for *N*-methyl dopamine ( $m/z = 166.1$ ) and cyclic product ( $m/z = 164.1$ ), showing no product formation after 151 min. (b) FsqB does not catalyze the cyclization of *N*-methyl-L-tyrosine. Ion chromatograms for *N*-methyl-L-tyrosine ( $m/z = 194.1$ ) and cyclic product ( $m/z = 192.1$ ) obtained after 151 min show no product formation. (c) FsqB does not catalyze the cyclization of *N,N*-dimethyl DOPA. Ion chromatograms for *N,N*-dimethyl DOPA ( $m/z = 224.1$ ) and putative cyclic product ( $m/z = 222.1$ ) obtained after 200 min show no product formation. Validating FsqB preference toward secondary  $\beta$ -*N*-methylamine substrates. (d) FsqB does not catalyze the cyclization of (*S*)-reticuline. Ion chromatograms for (*S*)-reticuline ( $m/z = 328.1$ ) and cyclic product ( $m/z = 326.1$ ) obtained after 12 h show no product formation.

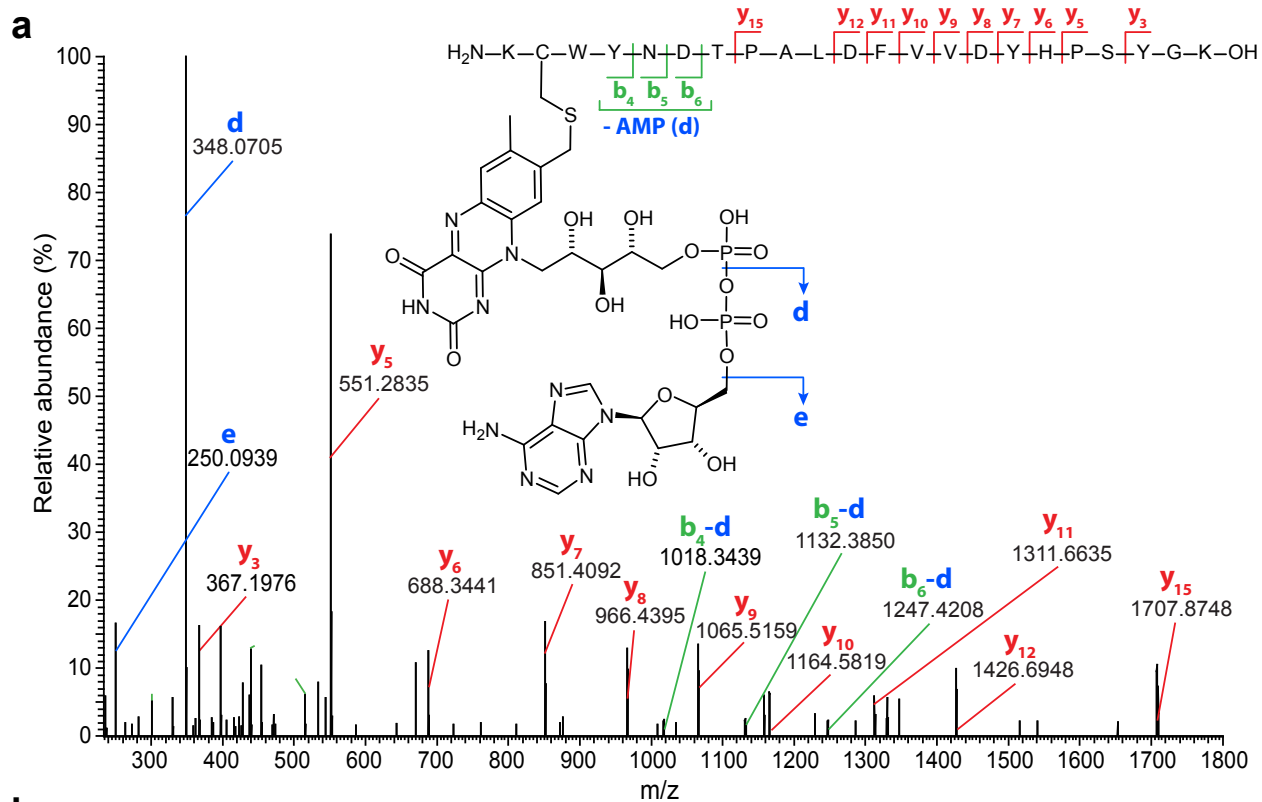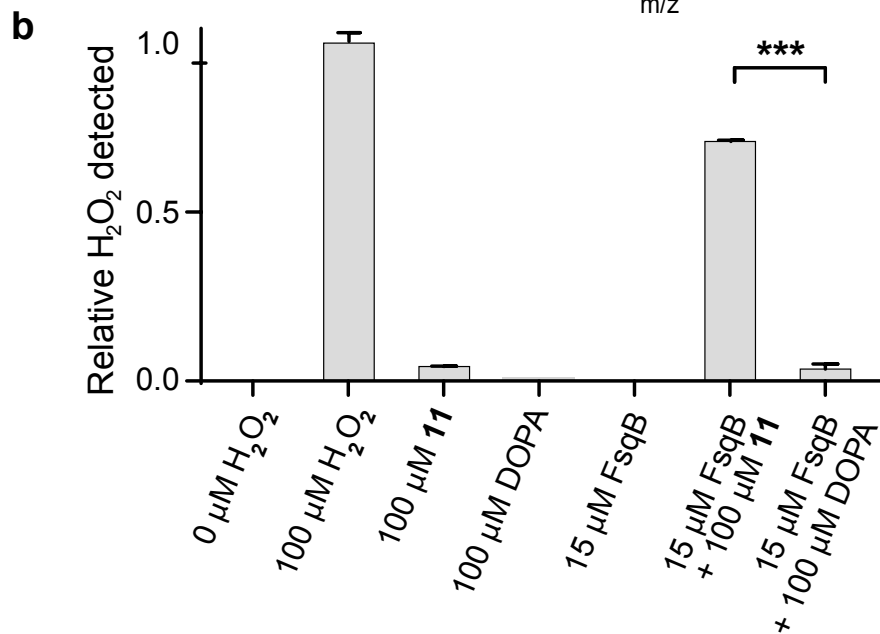

**Supplementary Figure 13. FsqB features a covalently bound FAD cofactor and produces H<sub>2</sub>O<sub>2</sub> in the presence of substrate** (a) Collision-induced dissociation mass spectrum of tryptic FsqB peptide, revealing covalently bound FAD. Amino acid sequence and location of FAD attachment were inferred from indicated *b*- (green) and *y*-type (red) ion series and diagnostic FAD fragmentation (blue). (b) Amplex Red H<sub>2</sub>O<sub>2</sub> assay of 15 μM FsqB with or without 11, or 3,4-dihydroxy-DL-phenylalanine (DOPA) (100 mM phosphate buffer, pH 7, 1.5 h). Values were normalized to 0 and 100 μM H<sub>2</sub>O<sub>2</sub> and presented as mean ± s.d. (n = 3), where \* *P* < 0.05, \*\* *P* < 0.001, \*\*\* *P* < 0.0001, determined using Student's *t*-test.

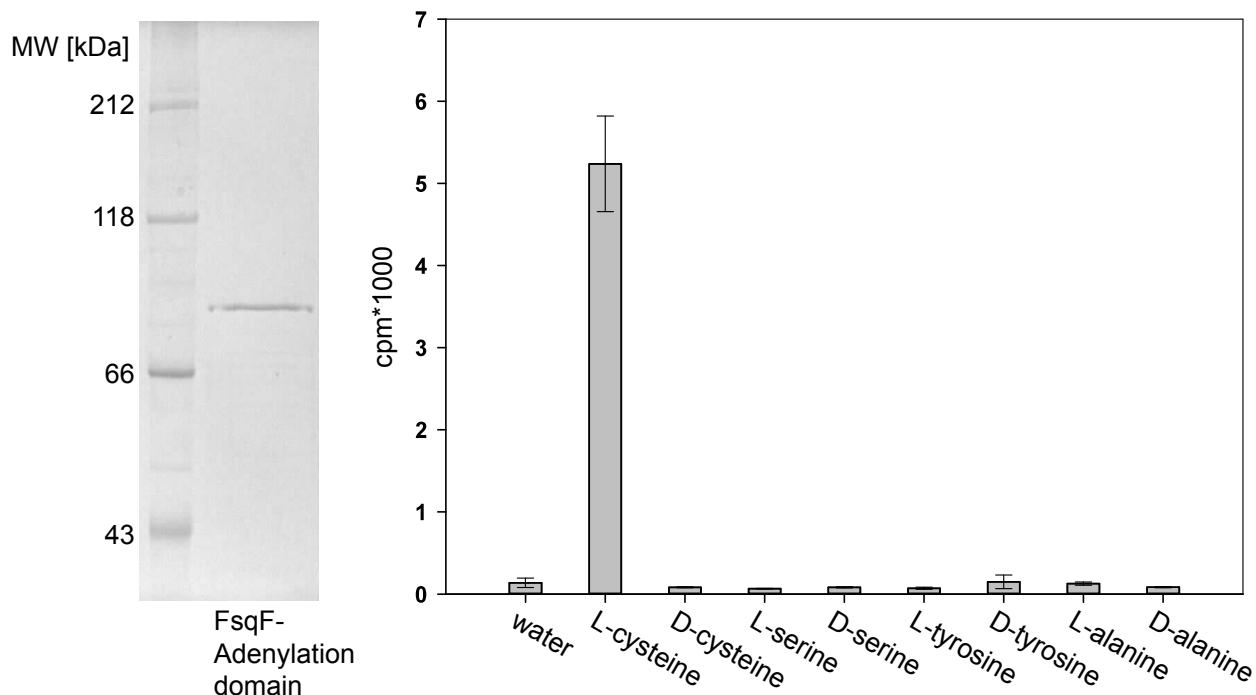

**Supplementary Figure 14. Properties of recombinant FsqF adenylation domain.** SDS-polyacrylamide gel showing the purity of the FsqF adenylation domain (left), and ATP-[<sup>32</sup>P]pyrophosphate exchange assay results (right) for amino acids selected based on results from the stable-isotope labeling experiments (see **Fig. 4a-c** and **Supplementary Fig. 6** and Online Methods). The exchange assay shows none or minimal (in the case of L-cysteine) activation for all tested amino acids. Collectively, the assay results suggest that no standard amino acid is the true substrate, but rather a derivative of an amino acid, such as dehydroalanine, as proposed in the biosynthetic model shown in main text **Fig. 3**.

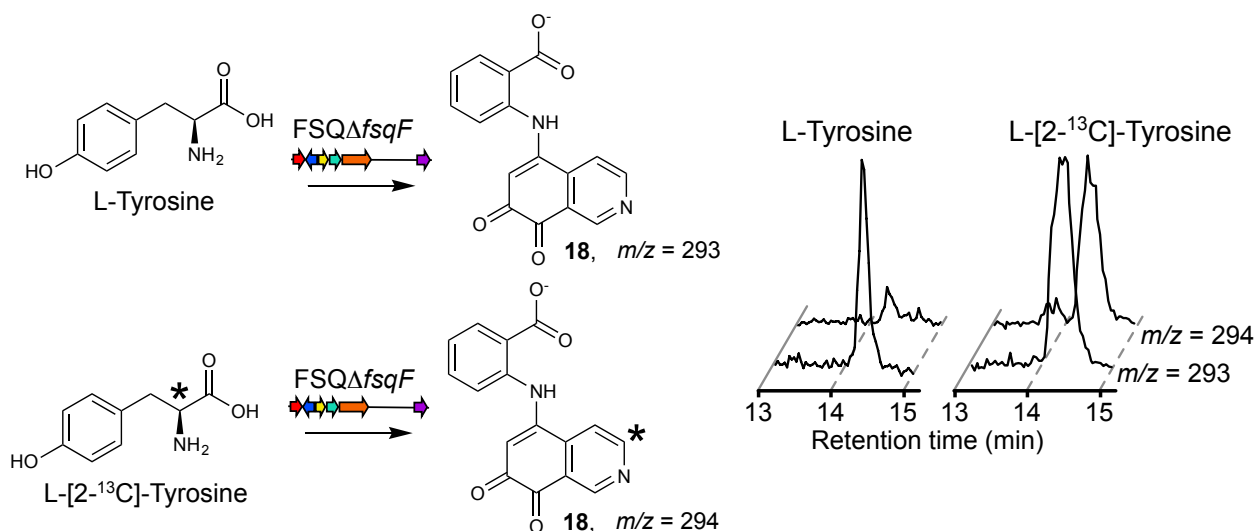

**Supplementary Figure 15. L-tyrosine is incorporated into shunt metabolite **18**.** Ion chromatograms extracted from HPLC-MS analysis of extracts from OE::*fsqA*-Δ*fsqF* fed with L-tyrosine or L-[2-<sup>13</sup>C]-tyrosine. The indicated  $m/z$  values correspond to **18** with or without heavy atom incorporation. The data support the hypothesis that FsqD is responsible for incorporation of L-tyrosine and not FsqF, as shown in main text **Fig. 3**.

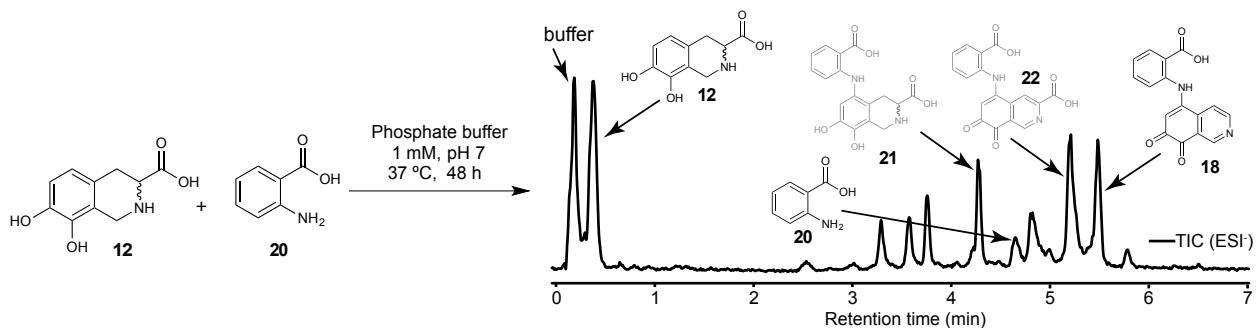

**Supplementary Figure 16. Shunt metabolite 18 is produced non-enzymatically from 12 and anthranilic acid, 20.** High-resolution UHPLC-MS total ion chromatogram for a reaction mixture of **12** and **20** reveals formation of **18**, along with two intermediates, **21** and **22** (proposed structures shown in gray). See **Supplementary Table 1** for HRMS data.

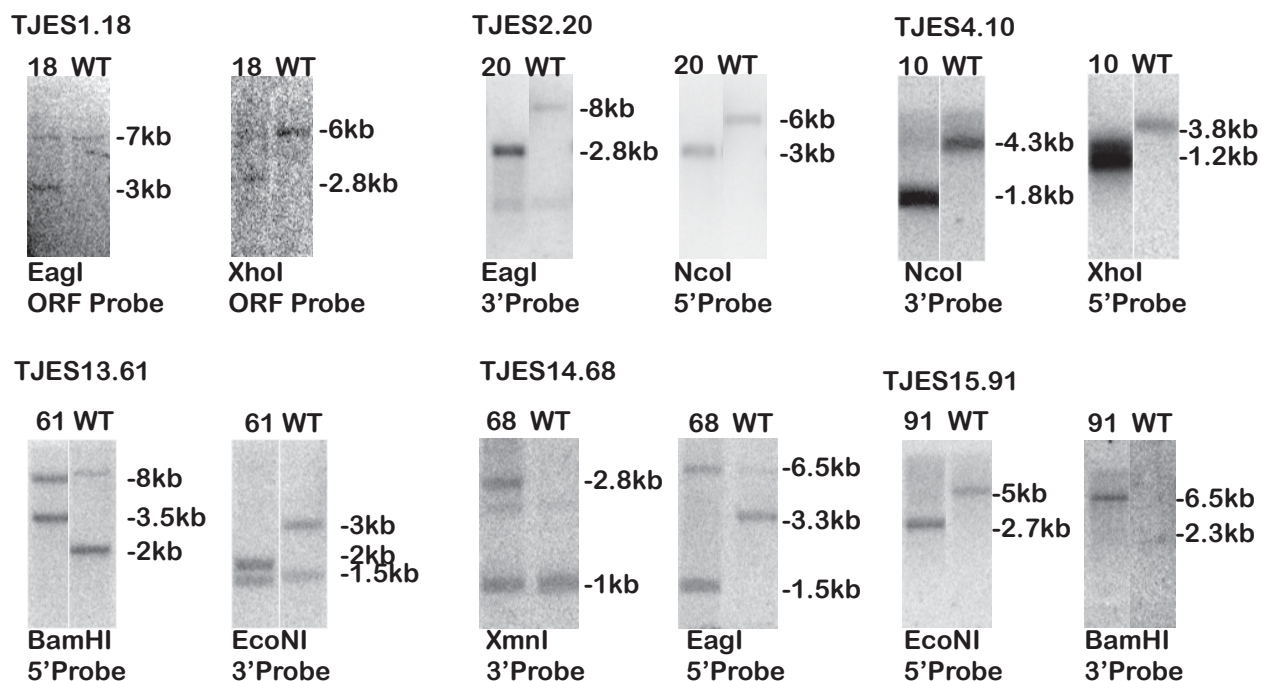

**Supplementary Figure 17. Southern analysis confirmation of all mutants used in this study.** Mutant (number) lanes are on the left of each image and the parental strain ("WT") is shown on the right. Expected band sizes correlating with those seen in the images are marked accordingly. Under each image is the enzymes used in the restriction digest as well as the nucleic acid probe us

## Supplementary References

1. Clauser, K. R., Baker, P. & Burlingame, A. L. Role of accurate mass measurement ( $\pm 10$  ppm) in protein identification strategies employing MS or MS/MS and database searching. *Anal Chem* **71**, 2871–82 (1999).
2. Xue, T., Nguyen, C. K., Romans, A., Kontoyiannis, D. P. & May, G. S. Isogenic auxotrophic mutant strains in the *Aspergillus fumigatus* genome reference strain AF293. *Arch Microbiol* **182**, 346-353 (2004).
3. He, Z., Price, M.S., O'Brien, G.R., Georgianna, D.R. & Payne, G.A. Improved protocols for functional analysis in the pathogenic fungus *Aspergillus flavus*. *BMC Microbiology* **7**, 104 (2007).
4. Palmer, J. M. *et al.* Loss of CclA, required for histone 3 lysine 4 methylation, decreases growth but increases secondary metabolite production in *Aspergillus fumigatus*. *PeerJ* **1**, e4 (2013).
5. Sekonyela, R. *et al.* RsmA regulates *Aspergillus fumigatus* gliotoxin cluster metabolites including cyclo(L-Phe-L-Ser), a potential new diagnostic marker for invasive aspergillosis. *PLoS One* **8**, e62591 (2013).
6. Lim, F.Y., *et al.* Genome-Based Cluster Deletion Reveals an Endocrin Biosynthetic Pathway in *Aspergillus fumigatus*. *Appl Environ Microbiol* **78**, 4117-4125 (2012).
7. Calvo, A.M., Bok, J.W., Brooks, W. & Keller, N.P. LeA Is Required for Toxin and Sclerotial Production in *Aspergillus parasiticus*. *Appl Environ Microbiol* **70**, 4733-4739 (2004)



## Supplementary Note

### $^1\text{H}$ (800 MHz) and $^{13}\text{C}$ (200 MHz) NMR spectroscopic data for fumisoquin A, **1**, in methanol- $d_4$ .

Chemical shifts were referenced to  $\delta(\text{CHD}_2\text{OD}) = 3.31$  and  $\delta(^{13}\text{C}\text{HD}_2\text{OD}) = 49.0$ .  $^{13}\text{C}$  chemical shifts were determined via HMBC and HSQC spectra.  $^1\text{H}$ ,  $^1\text{H}$ - $J$ -coupling constants were determined from the acquired  $^1\text{H}$  or dqfCOSY spectra. NOESY correlations were observed using a mixing time of 400 ms. HMBC correlations are from the proton(s) stated to the indicated  $^{13}\text{C}$  atom.

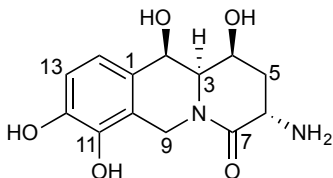

| No. | $\delta_c$ | Proton           | $\delta\text{H}$ ( $J_{\text{HH}}$ [Hz])                          | HMBC                          | NOESY     |
|-----|------------|------------------|-------------------------------------------------------------------|-------------------------------|-----------|
| 1   | 128.03     |                  |                                                                   |                               |           |
| 2   | 70.99      | 2-H              | 4.94 ( $J_{2,3} = 1.9$ )                                          | 1, 3, 4, 7, 10, 11, 14        | 3, 4, 14  |
| 3   | 60.44      | 3-H              | 3.73 ( $J_{3,2} = 1.9$ , $J_{3,4} = 8.7$ )                        | 1, 7                          | 2, 4, 5b  |
| 4   | 67.19      | 4-H              | 4.65 ( $J_{4,3} = 8.7$ , $J_{4,5a} = 7.6$ , $J_{4,5b} < 1$ )      | 5                             | 2, 5a, 5b |
| 5   | 33.67      | 5-H <sub>a</sub> | 2.46 ( $J_{5a,4} = 7.6$ , $J_{5a,5b} = 13.0$ , $J_{5a,6} = 5.7$ ) | 3, 4, 6, 7                    | 4, 6, 5b  |
|     |            | 5-H <sub>b</sub> | 2.06 ( $J_{5b,4} < 1$ , $J_{5b,5a} = 13.0$ , $J_{5b,6} = 12.4$ )  | 3, 4, 6, 7                    | 3, 4, 5a  |
| 6   | 47.88      | 6-H              | 4.29 ( $J_{6,5a} = 5.7$ , $J_{6,5b} = 12.4$ )                     | 5, 7                          | 5a        |
| 7   | 169.75     |                  |                                                                   |                               |           |
| 8   |            |                  |                                                                   |                               |           |
| 9   | 42.35      | 9-H <sub>a</sub> | 4.66 ( $J_{9\text{Ha},9\text{Hb}} = 18.0$ )                       | 1, 2, 3, 6, 7, 10, 11, 12, 13 |           |
|     |            | 9-H <sub>b</sub> | 4.78 ( $J_{9\text{Hb},9\text{Ha}} = 18.0$ )                       | 1, 2, 3, 6, 7, 10, 11, 12, 13 | 3         |
| 10  | 119.92     |                  |                                                                   |                               |           |
| 11  | 142.82     |                  |                                                                   |                               |           |
| 12  | 146.06     |                  |                                                                   |                               |           |
| 13  | 114.23     | 13-H             | 6.73 ( $J_{13,14} = 8.0$ )                                        | 1, 10, 11, 12                 | 14        |
| 14  | 120.04     | 14-H             | 6.70 ( $J_{14,13} = 8.0$ )                                        | 1, 2, 4, 9, 10, 12, 13        | 2, 1 3    |

Fumisoquin A (1),  $^1\text{H}$  NMR spectrum,  
methanol- $d_4$ , 800 MHz

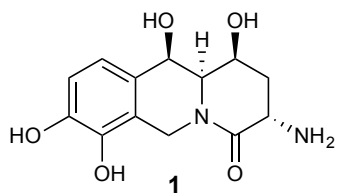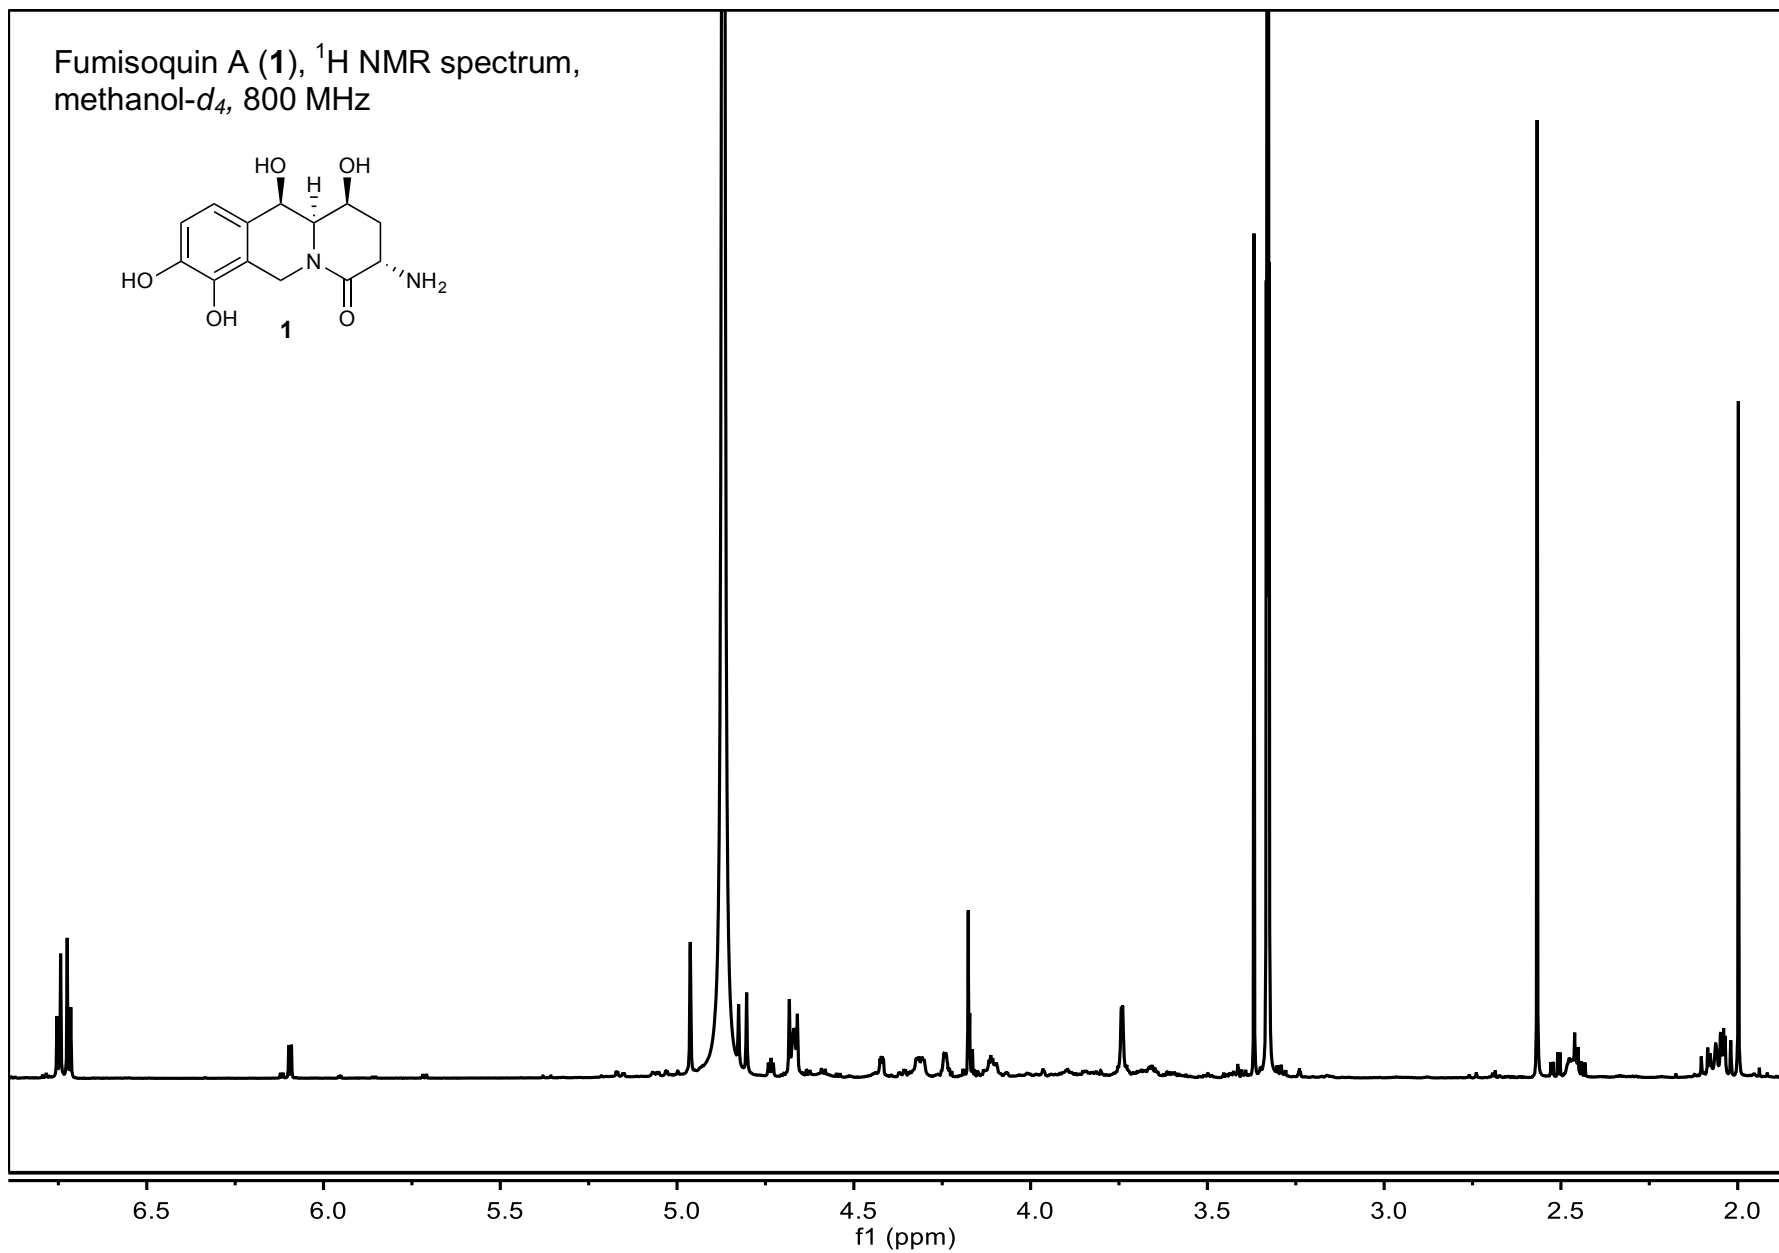

Fumisoquin A (1), dqfCOSY spectrum, methanol-*d*<sub>4</sub>, 800 MHz

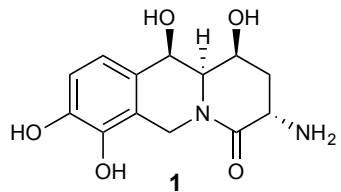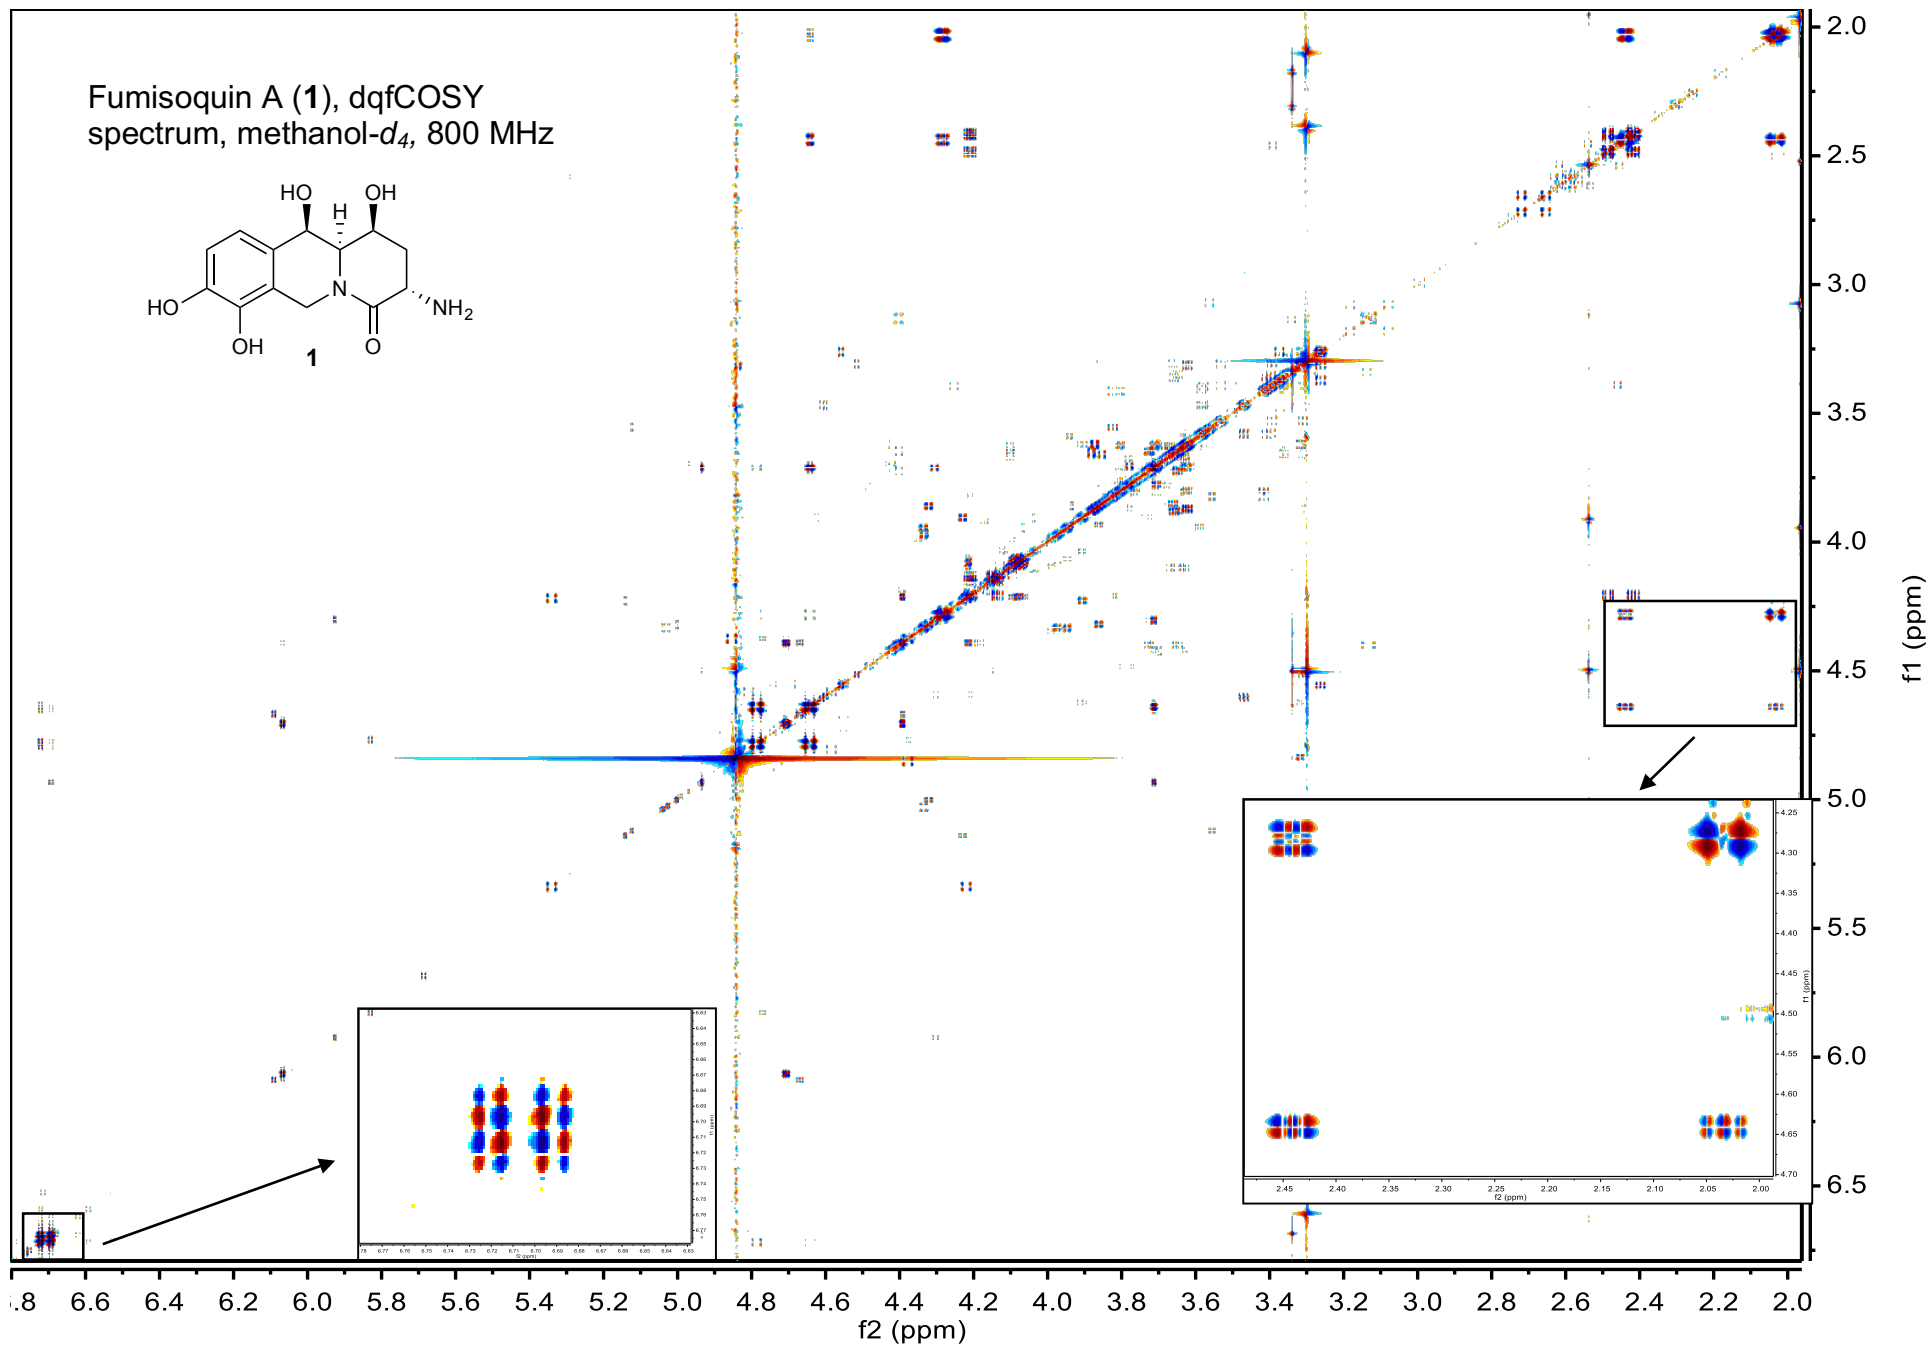

Fumisoquin A (**1**), coupled HSQC spectrum, methanol-*d*<sub>4</sub>, 800 MHz

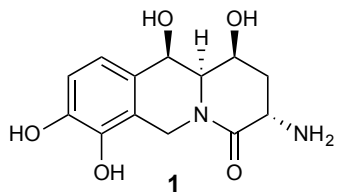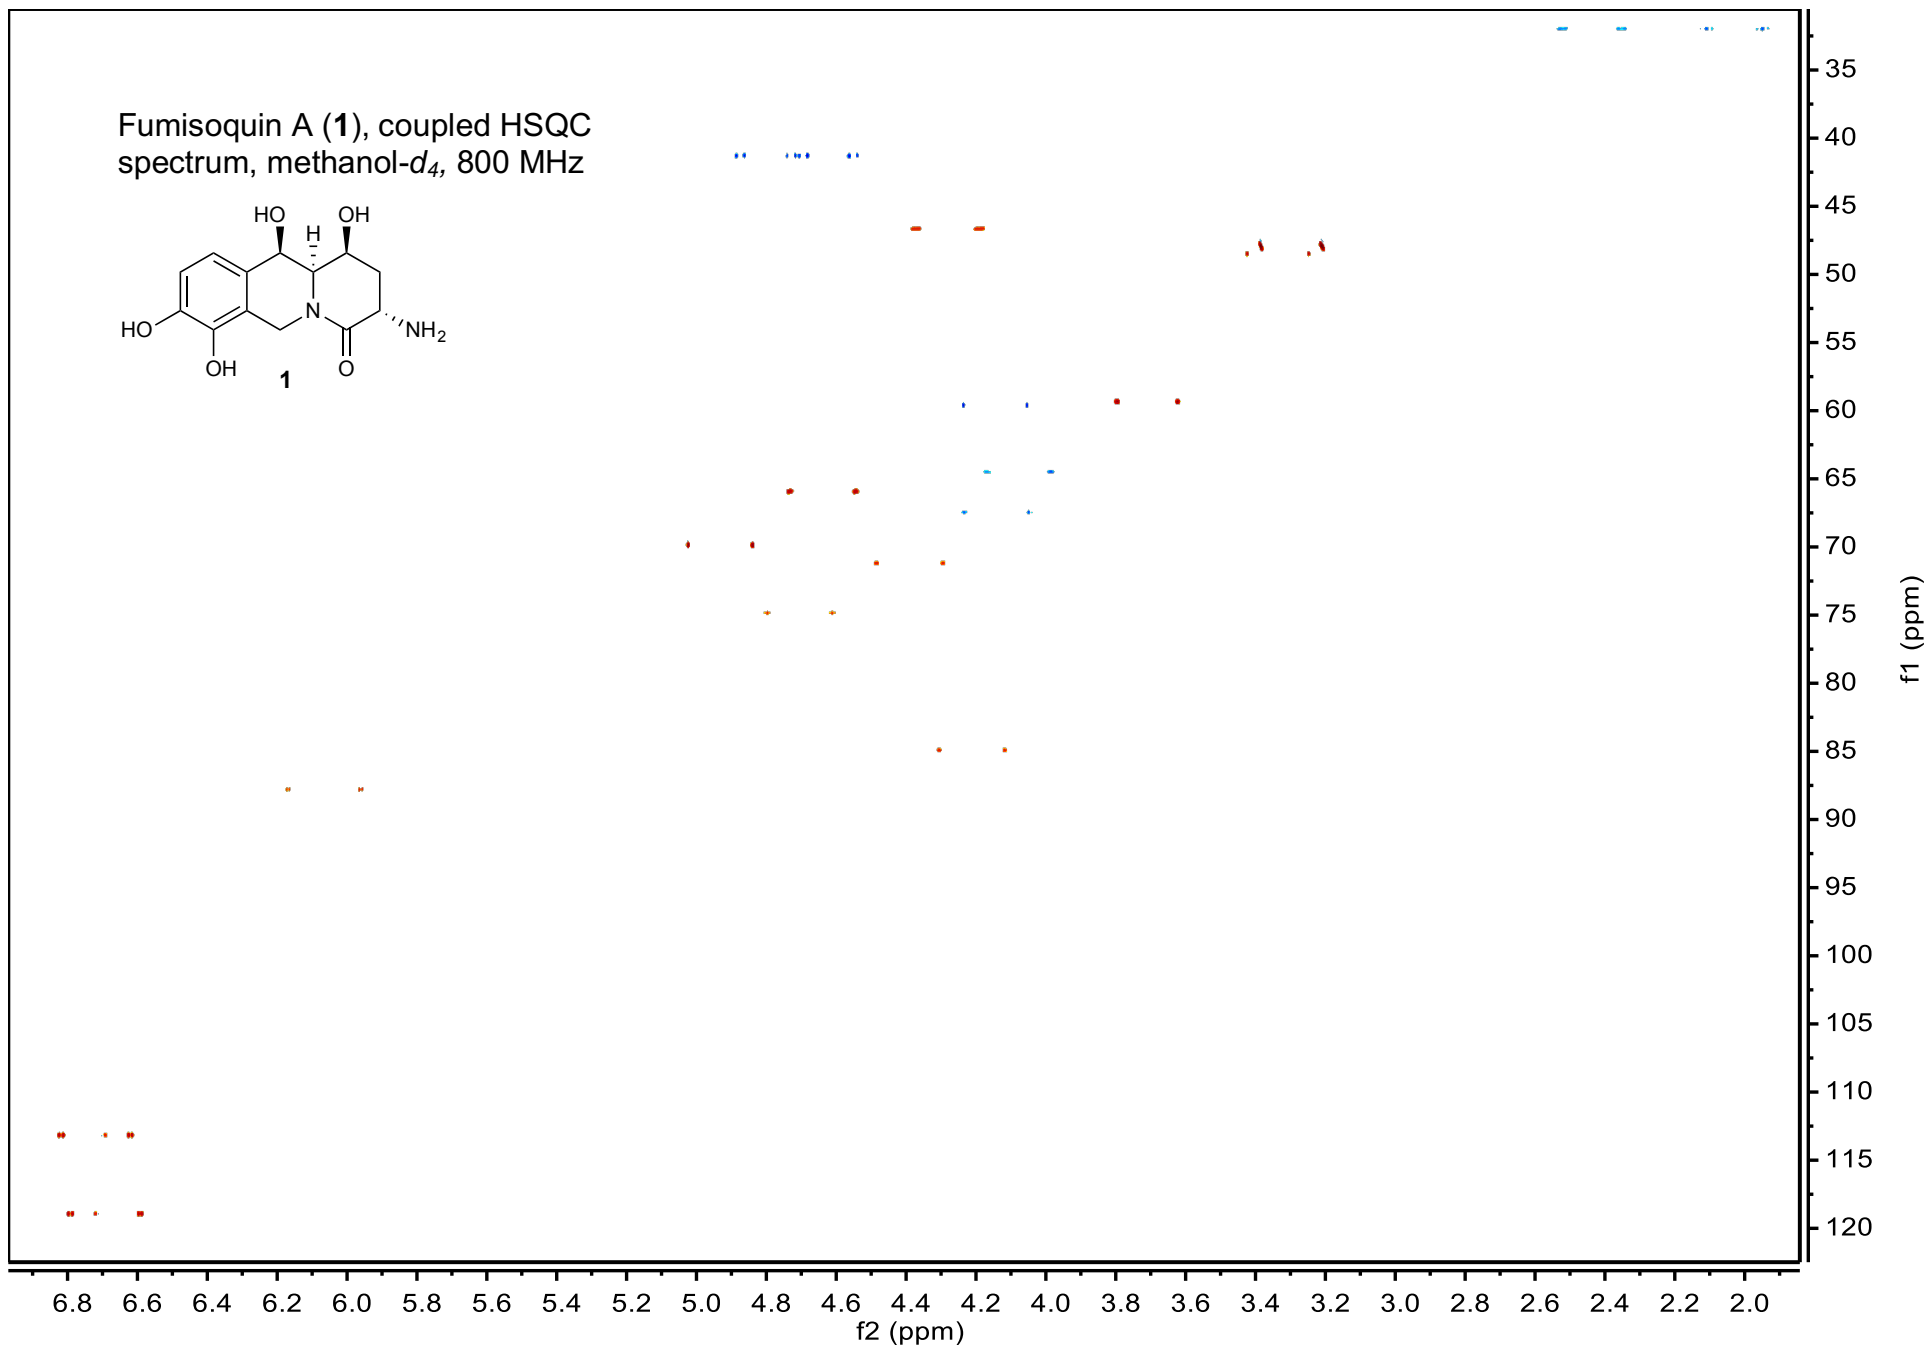

Fumisoquin A (1), HMBC spectrum,  
methanol-*d*<sub>4</sub>, 800 MHz

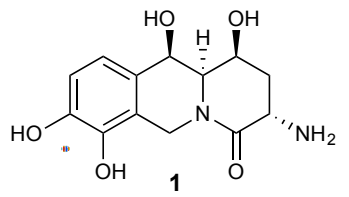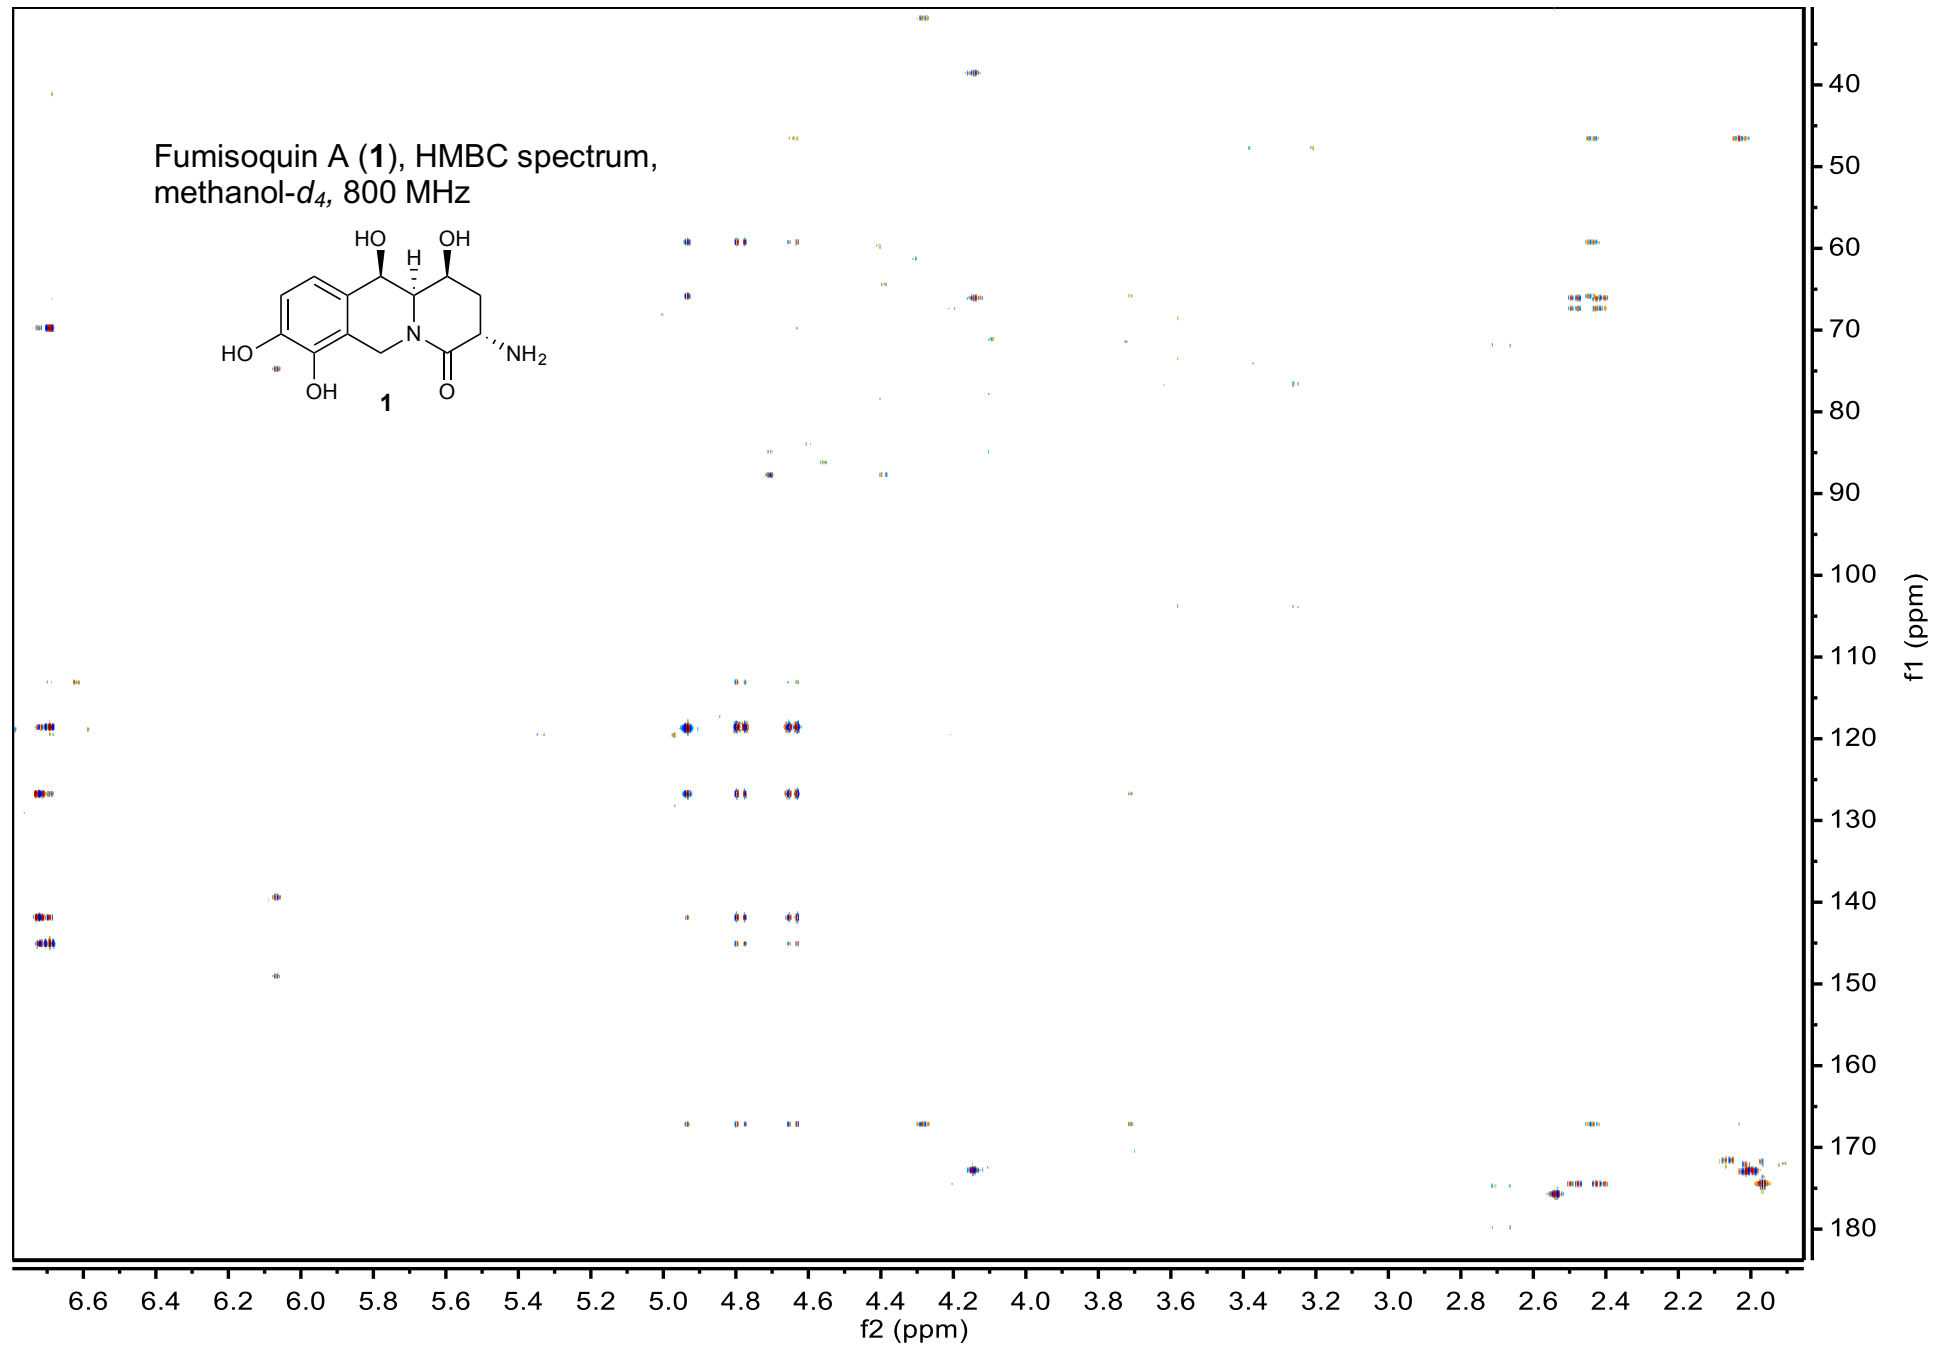

Fumisoquin A (1), NOESY spectrum,  
methanol-*d*<sub>4</sub>, 800 MHz

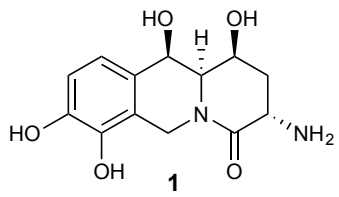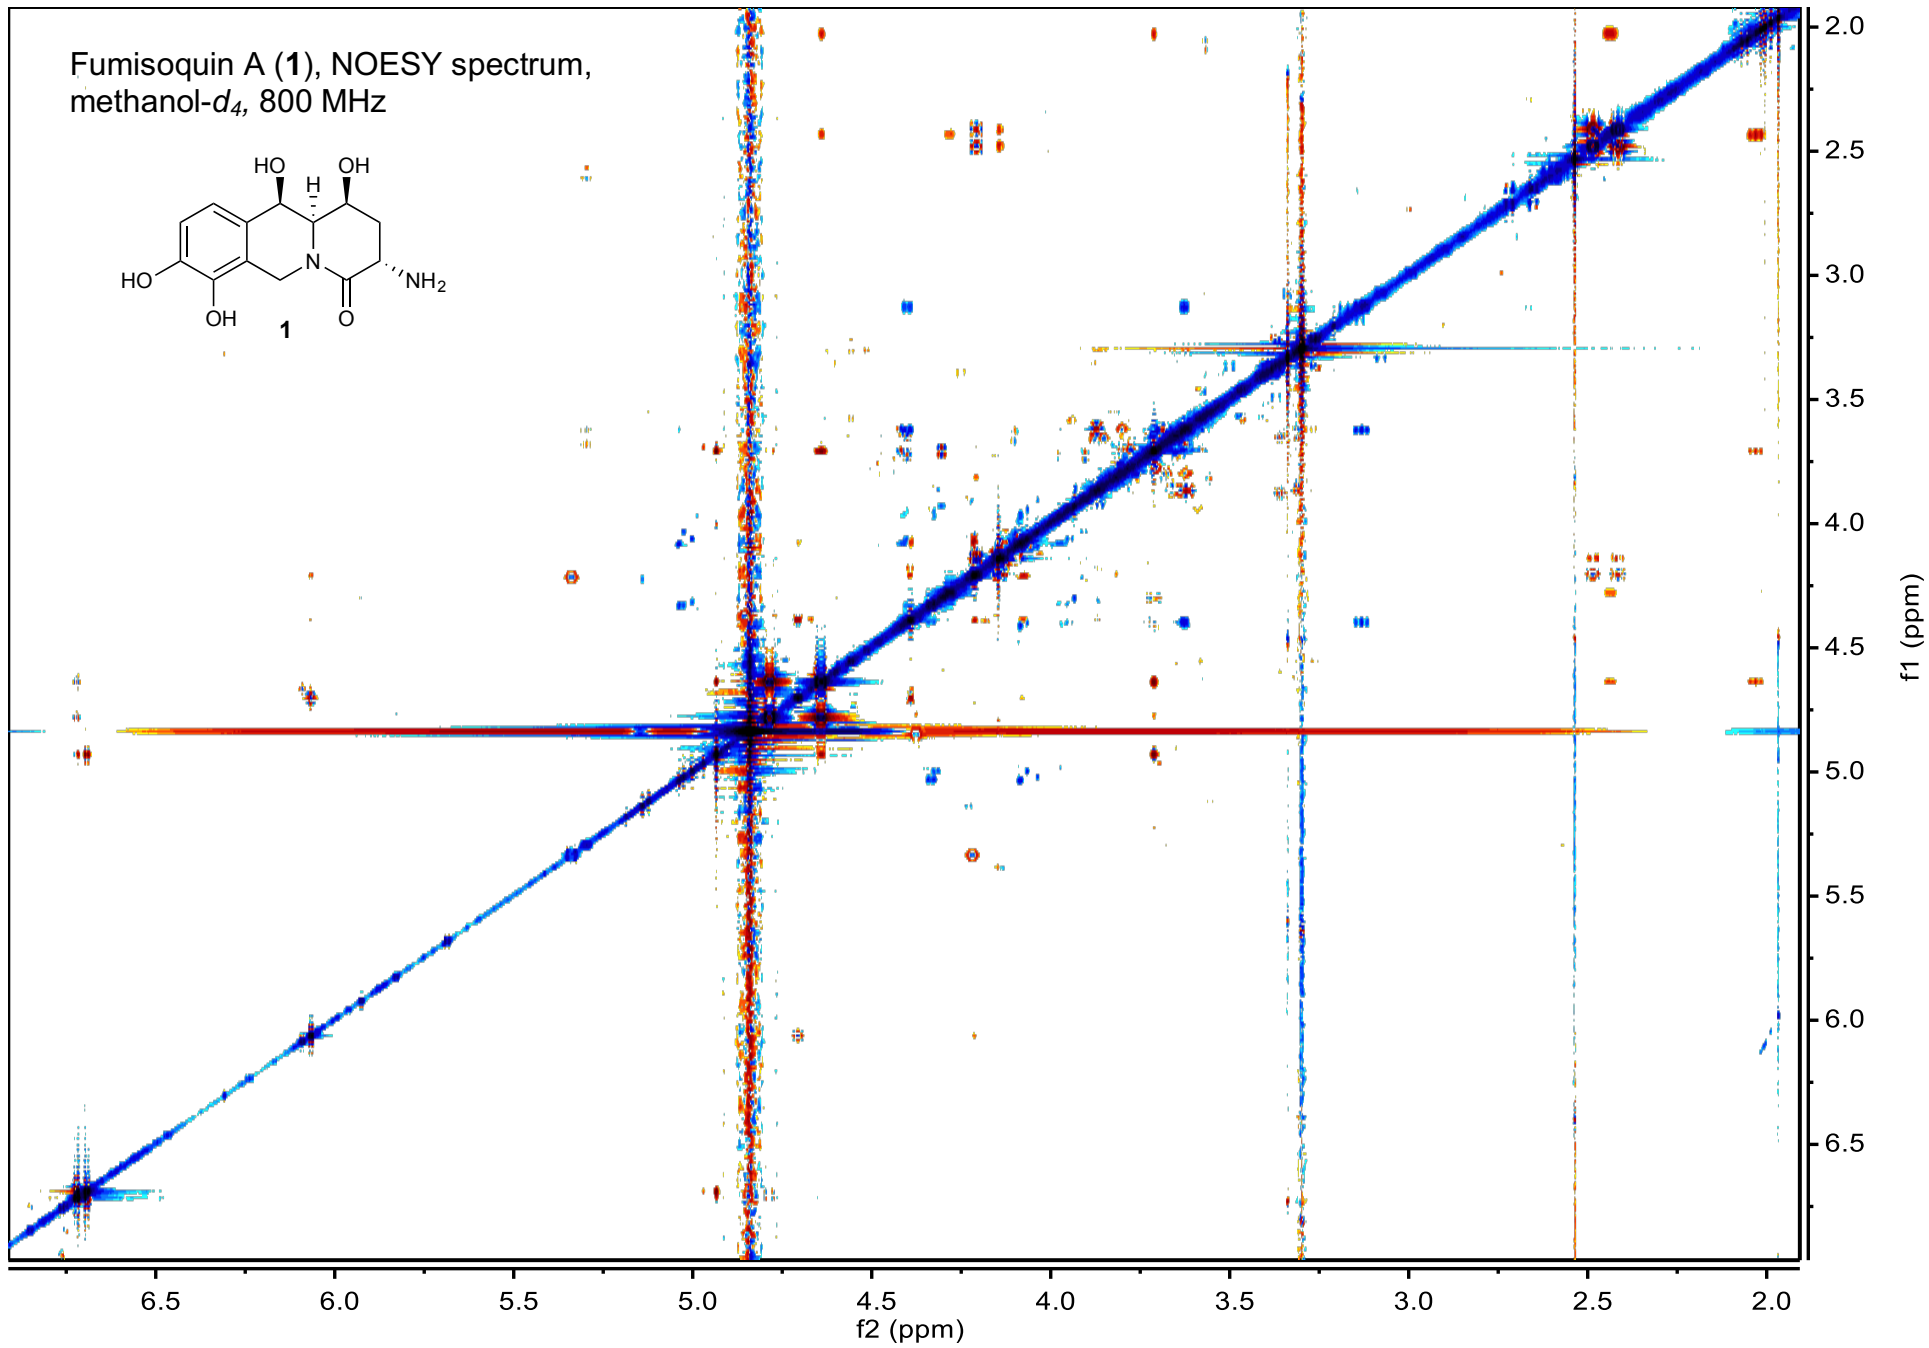

**<sup>1</sup>H (600 MHz) and <sup>13</sup>C (151 MHz) NMR spectroscopic data for fumisoquin B, 2, in methanol-d<sub>4</sub>.**

Chemical shifts were referenced to  $\delta(\underline{\text{C}}\text{HD}_2\text{OD}) = 3.31$  and  $\delta(^{13}\underline{\text{C}}\text{HD}_2\text{OD}) = 49.0$ . <sup>13</sup>C chemical shifts were determined via HMBC and HSQC spectra. <sup>1</sup>H, <sup>1</sup>H-*J*-coupling constants were determined from the acquired <sup>1</sup>H or dqfCOSY spectra. ROESY correlations were observed using a mixing time of 500 ms. HMBC correlations are from the proton(s) stated to the indicated <sup>13</sup>C atom.

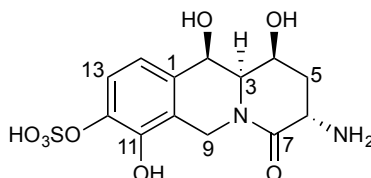

| No. | $\delta_c$ | Proton           | $\delta_H$ ( $J_{HH}$ [Hz])                                  | HMBC <sup>a</sup> | ROESY |
|-----|------------|------------------|--------------------------------------------------------------|-------------------|-------|
| 1   | 134.03     |                  |                                                              |                   |       |
| 2   | 70.75      | 2-H              | 4.98 ( $J_{2,3} = 2.0$ )                                     | 1, 3, 10          | 4, 14 |
| 3   | 60.19      | 3-H              | 3.71 ( $J_{3,2} = 2.0, J_{3,4} = 9.2$ )                      |                   | 5a    |
| 4   | 67.30      | 4-H              | 4.62 ( $J_{4,3} = 9.2, J_{4,5a} = 6.9, J_{4,5b} = 7.9$ )     | 6                 | 2     |
| 5   | 34.69      | 5-H <sub>a</sub> | 1.94 ( $J_{5a,4} = 6.9, J_{5a,5b} = 13.0, J_{5a,6} = 11.5$ ) | 4, 6, 7           | 3     |
|     |            | 5-H <sub>b</sub> | 2.43 ( $J_{5b,4} = 7.9, J_{5b,5a} = 13.0, J_{5b,6} = 5.8$ )  | 4, 6, 7           |       |
| 6   | 47.88      | 6-H              | 4.02 ( $J_{6,5a} = 11.5, J_{6,Hb} = 5.8$ )                   | 5, 7              |       |
| 7   | 171.61     |                  |                                                              |                   |       |
| 8   |            |                  |                                                              |                   |       |
| 9   | 42.26      | 9-H <sub>a</sub> | 4.63 ( $J_{9Ha,9Hb} = 18.5$ )                                | 3                 |       |
|     |            | 9-H <sub>b</sub> | 4.81 ( $J_{9Hb,9Ha} = 18.5$ )                                | 10, 11            |       |
| 10  | 121.61     |                  |                                                              |                   |       |
| 11  | 147.05     |                  |                                                              |                   |       |
| 12  | 140.92     |                  |                                                              |                   |       |
| 13  | 122.08     | 13-H             | 7.23 ( $J_{13,14} = 8.1$ )                                   | 1, 11, 12w        |       |
| 14  | 119.96     | 14-H             | 6.83 ( $J_{14,13} = 8.1$ )                                   | 2, 10, 12, 13     | 2     |

<sup>a</sup>w: weak correlation (less than ~10% of the intensity of strongest signal)

Metabolome fraction, containing  
fumisoquin B (**2**),  $^1\text{H}$  NMR spectrum,  
methanol- $d_4$ , 600 MHz

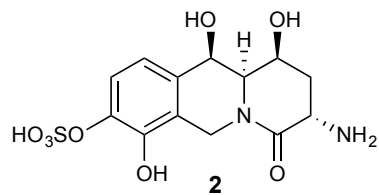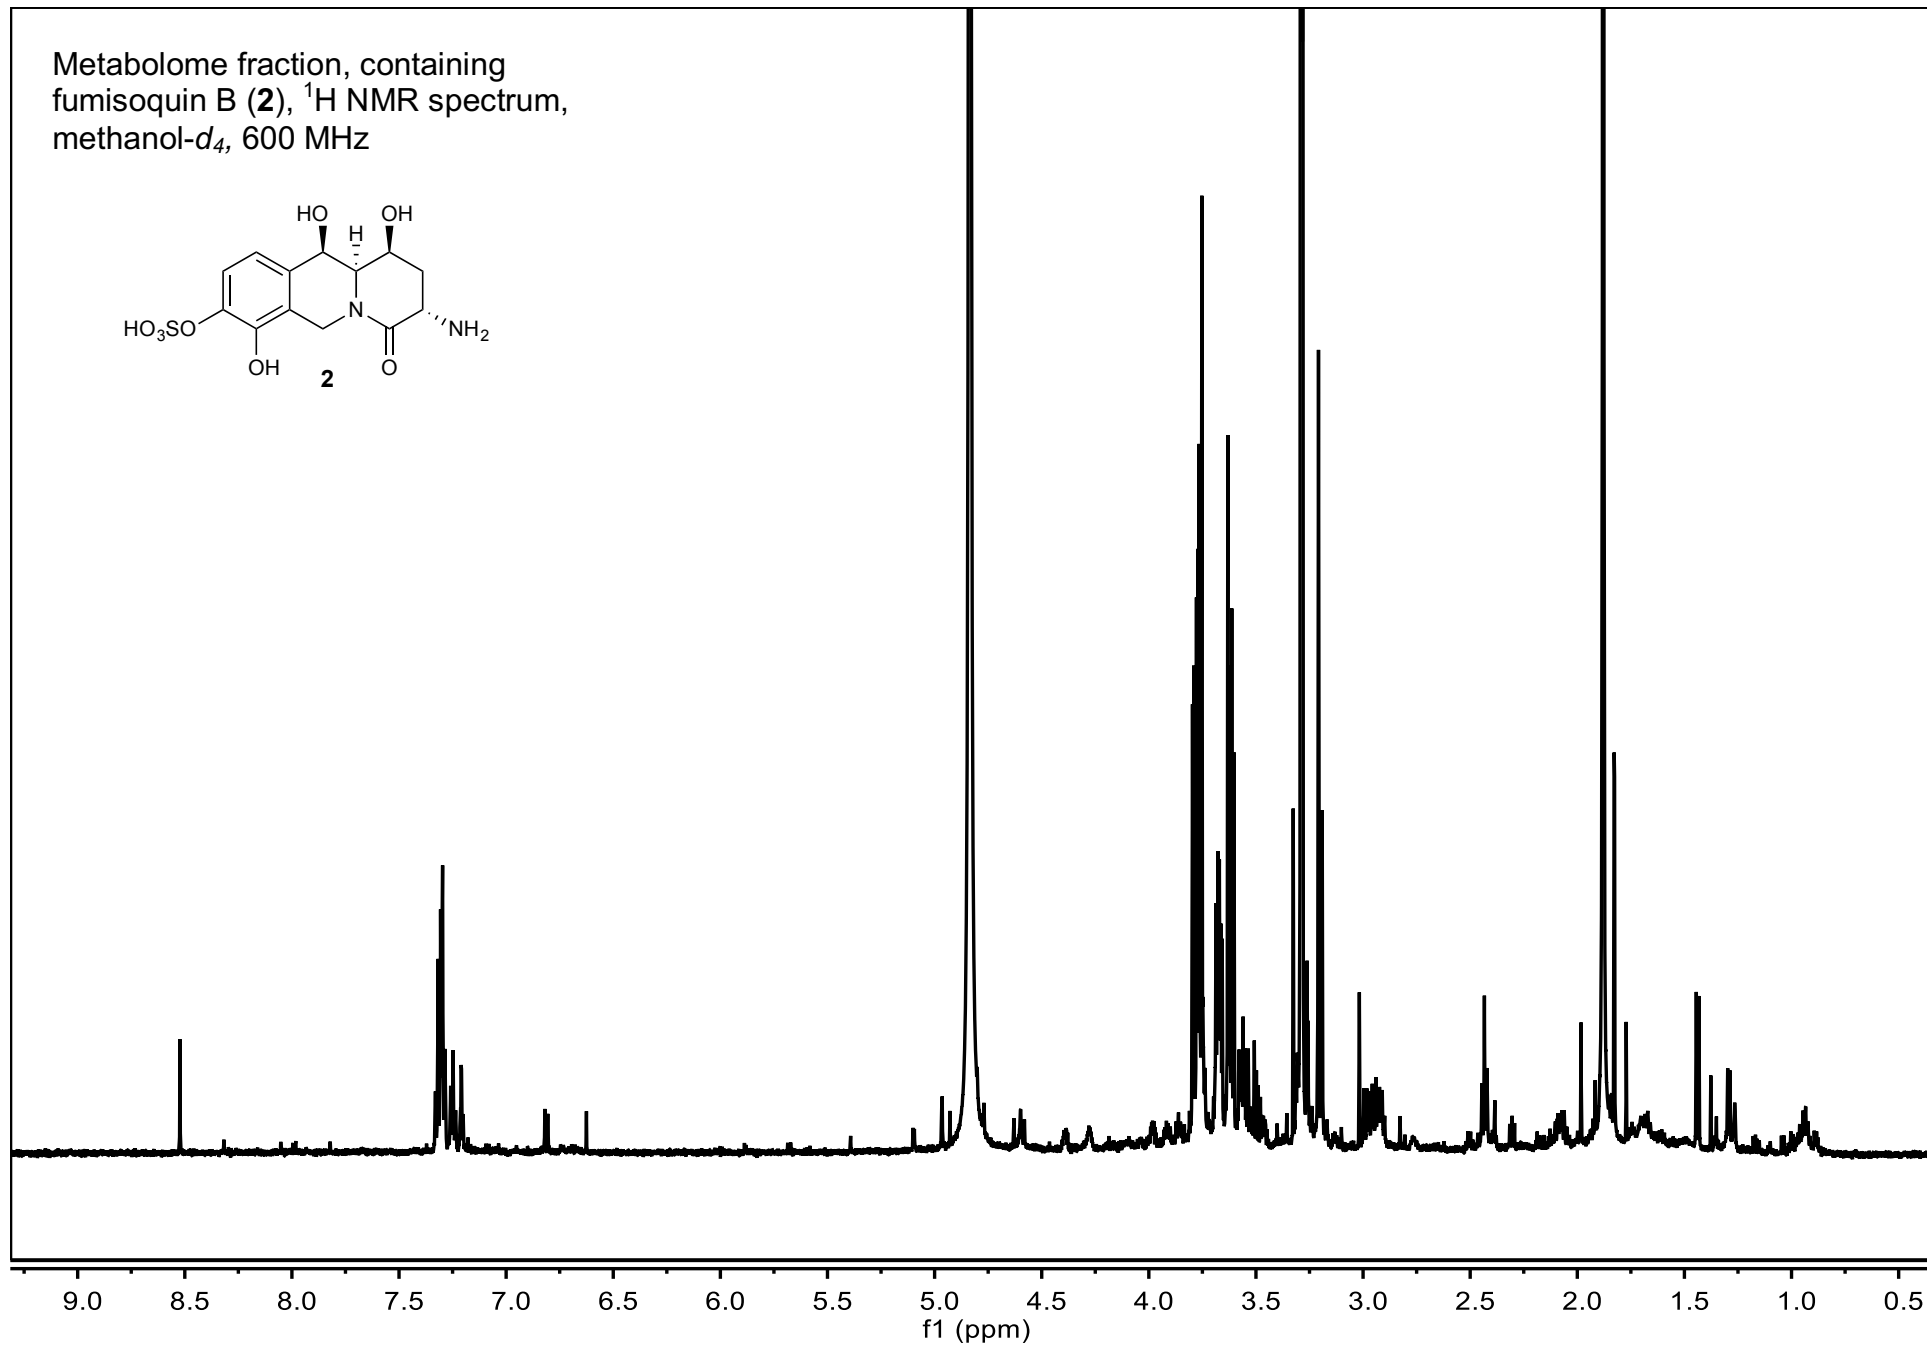



Metabolome fraction, containing  
fumisoquin B (**2**), dqfCOSY spectrum,  
methanol-*d*<sub>4</sub>, 600 MHz

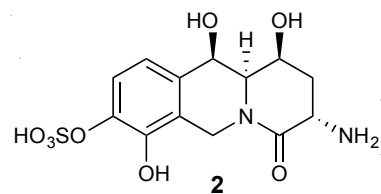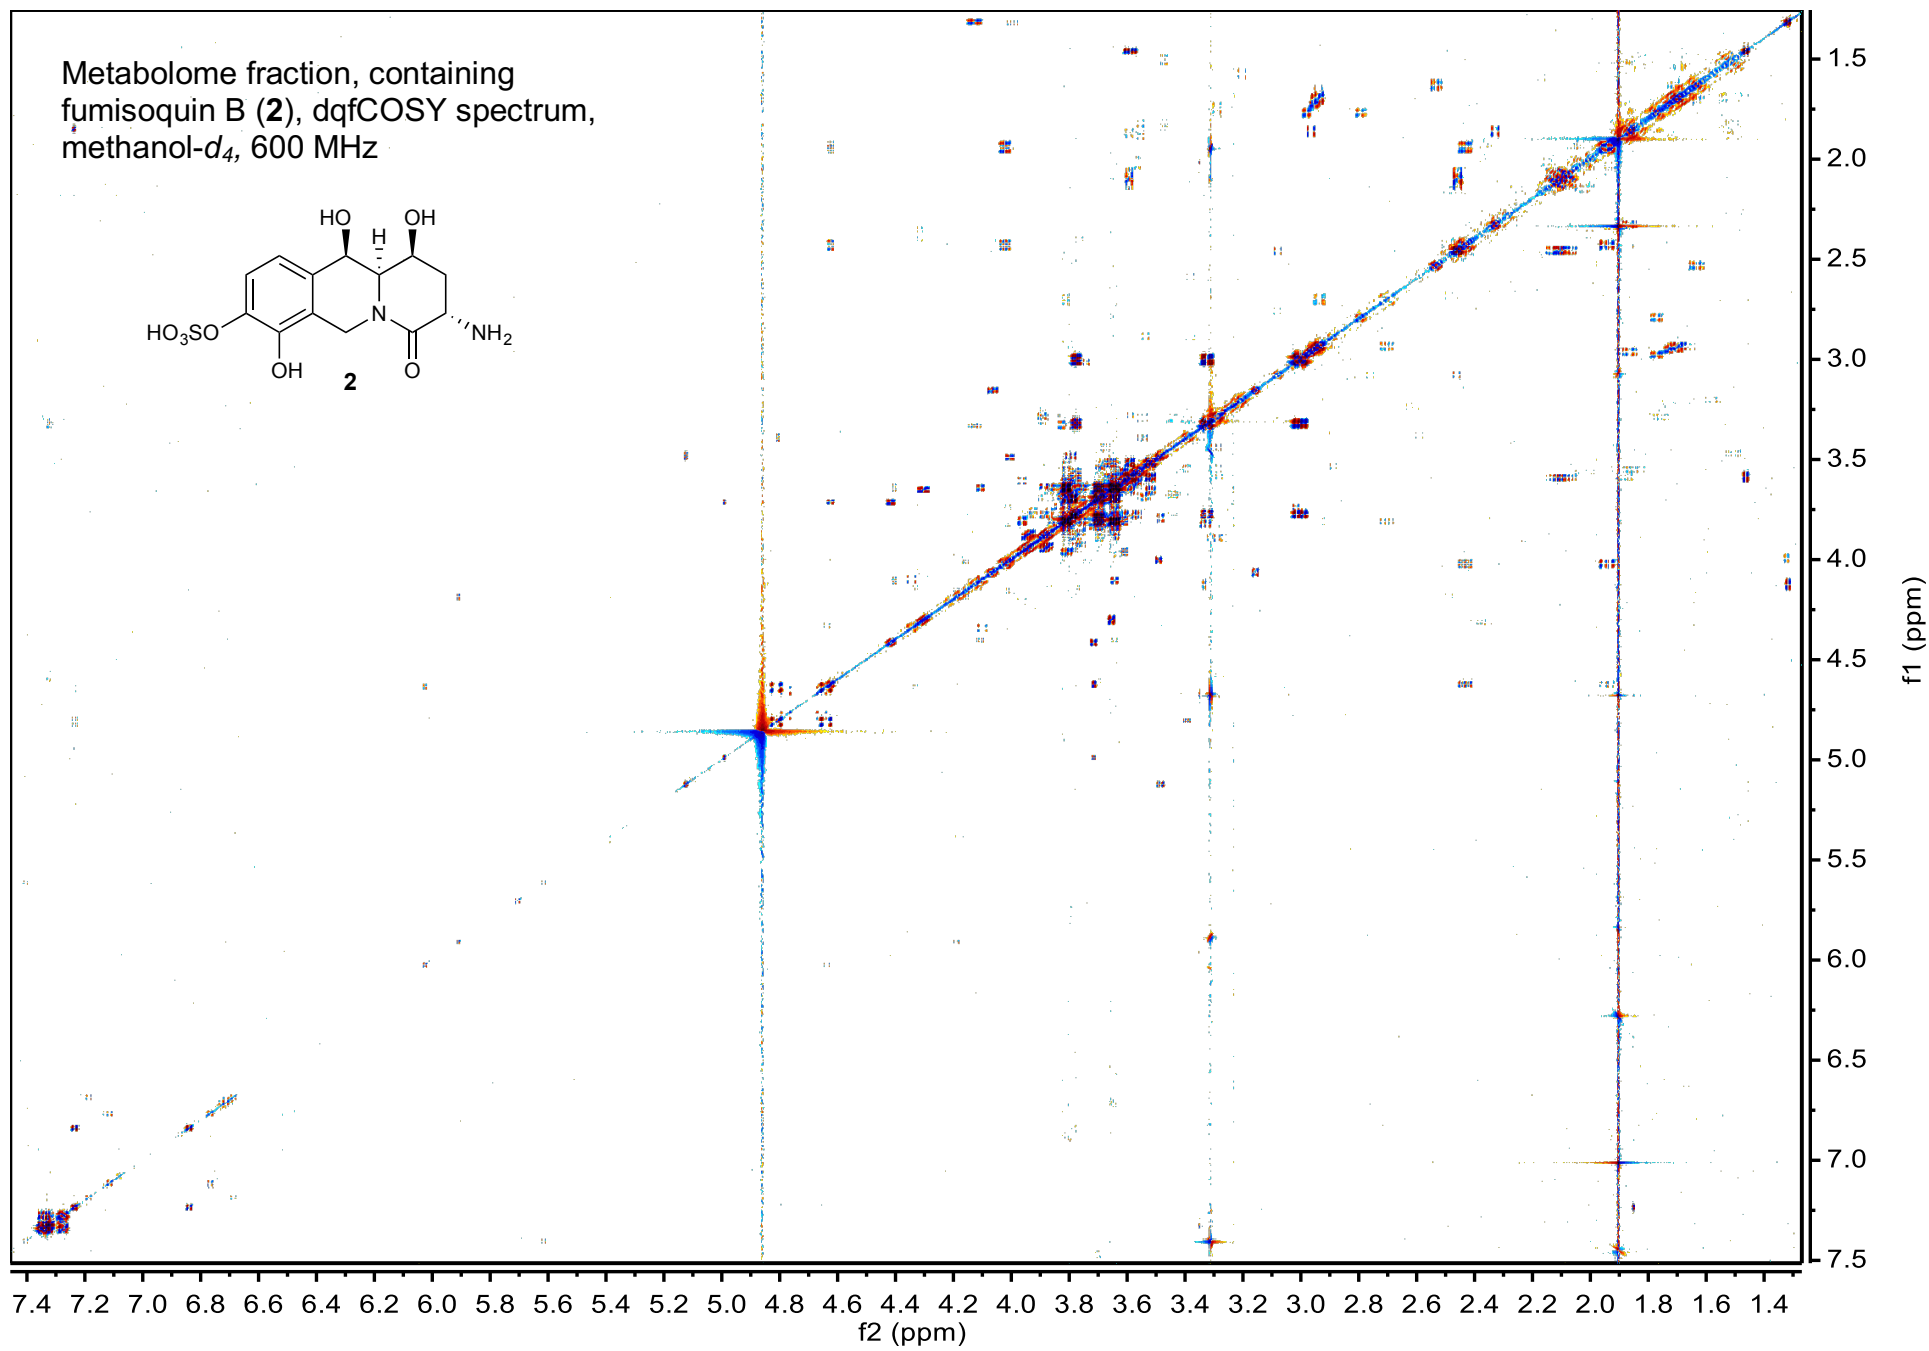

Metabolome fraction, containing  
fumisoquin B (**2**), coupled HSQC  
spectrum, methanol-*d*<sub>4</sub>, 600 MHz

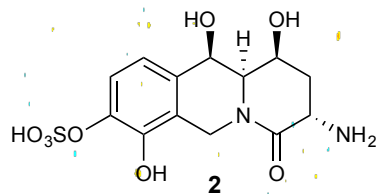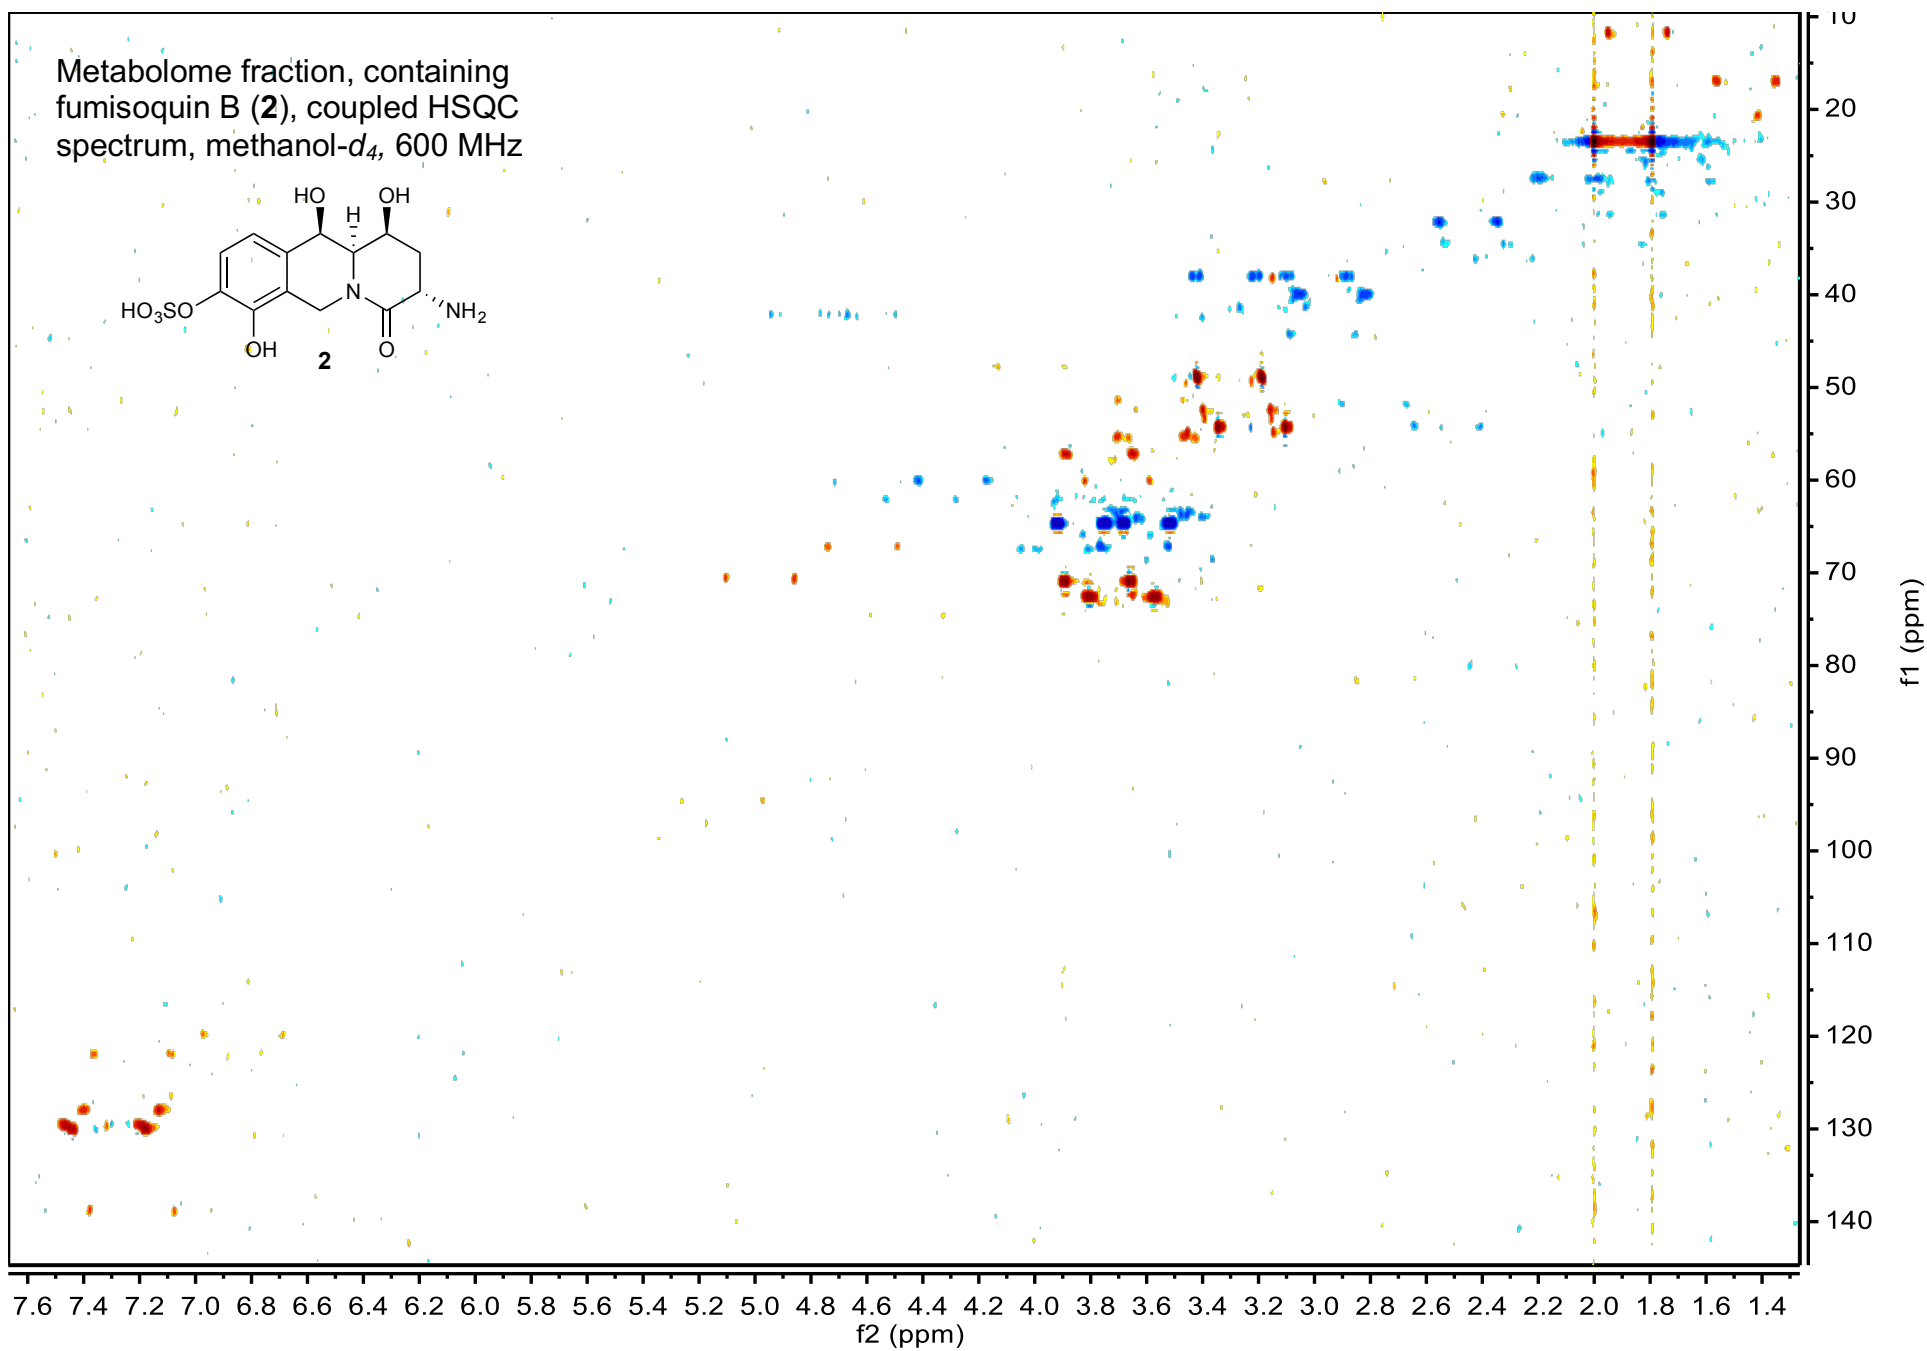

Metabolome fraction, containing  
fumisoquin B (**2**), HMBC spectrum,  
methanol-*d*<sub>4</sub>, 600 MHz

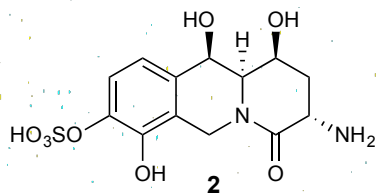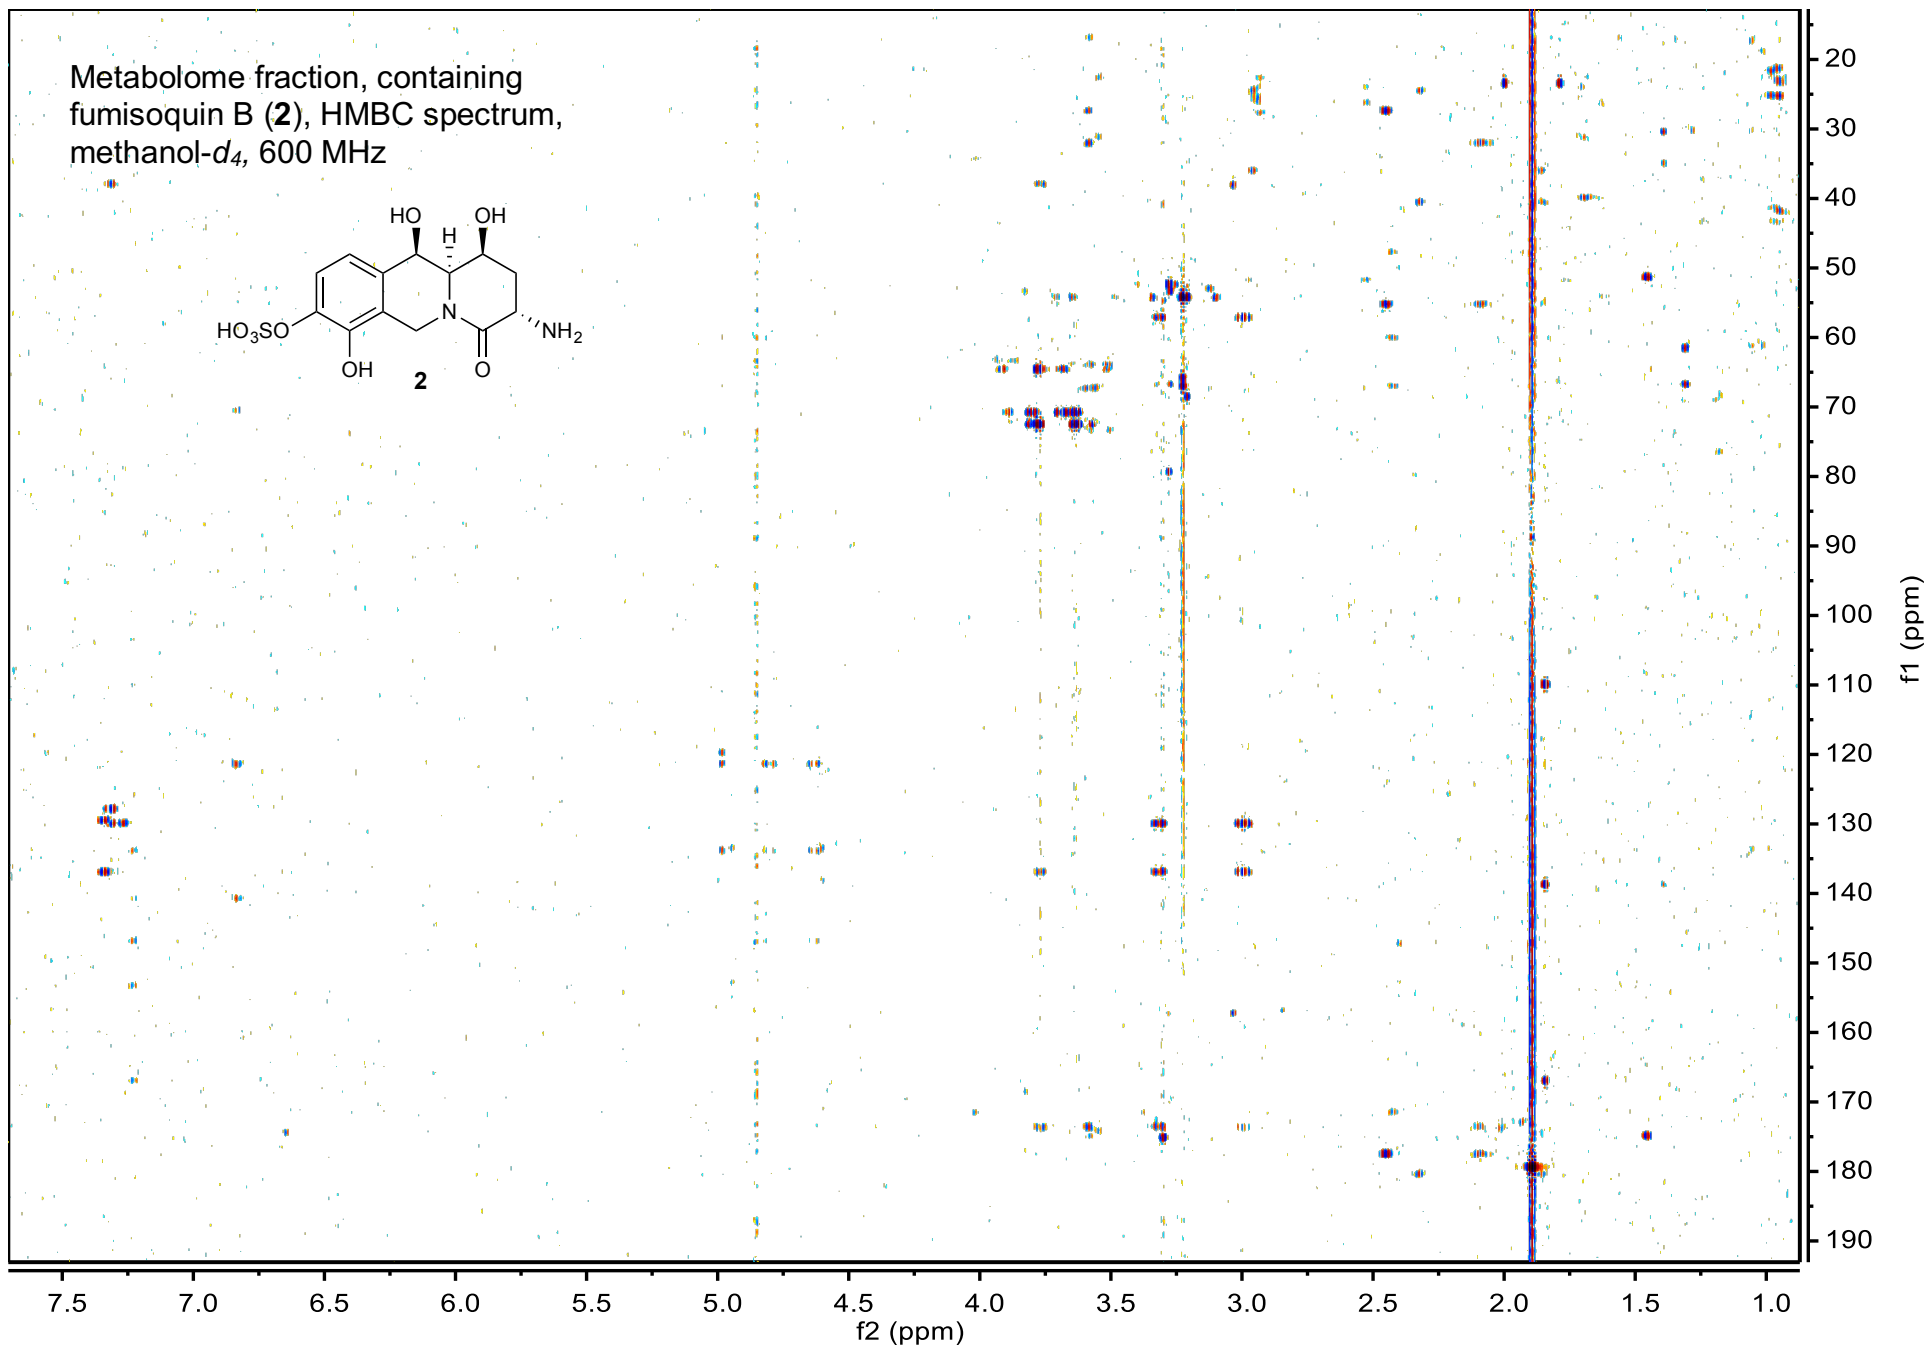

Metabolome fraction, containing  
fumisoquin B (**2**), ROESY spectrum,  
methanol-*d*<sub>4</sub>, 600 MHz

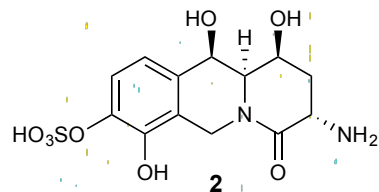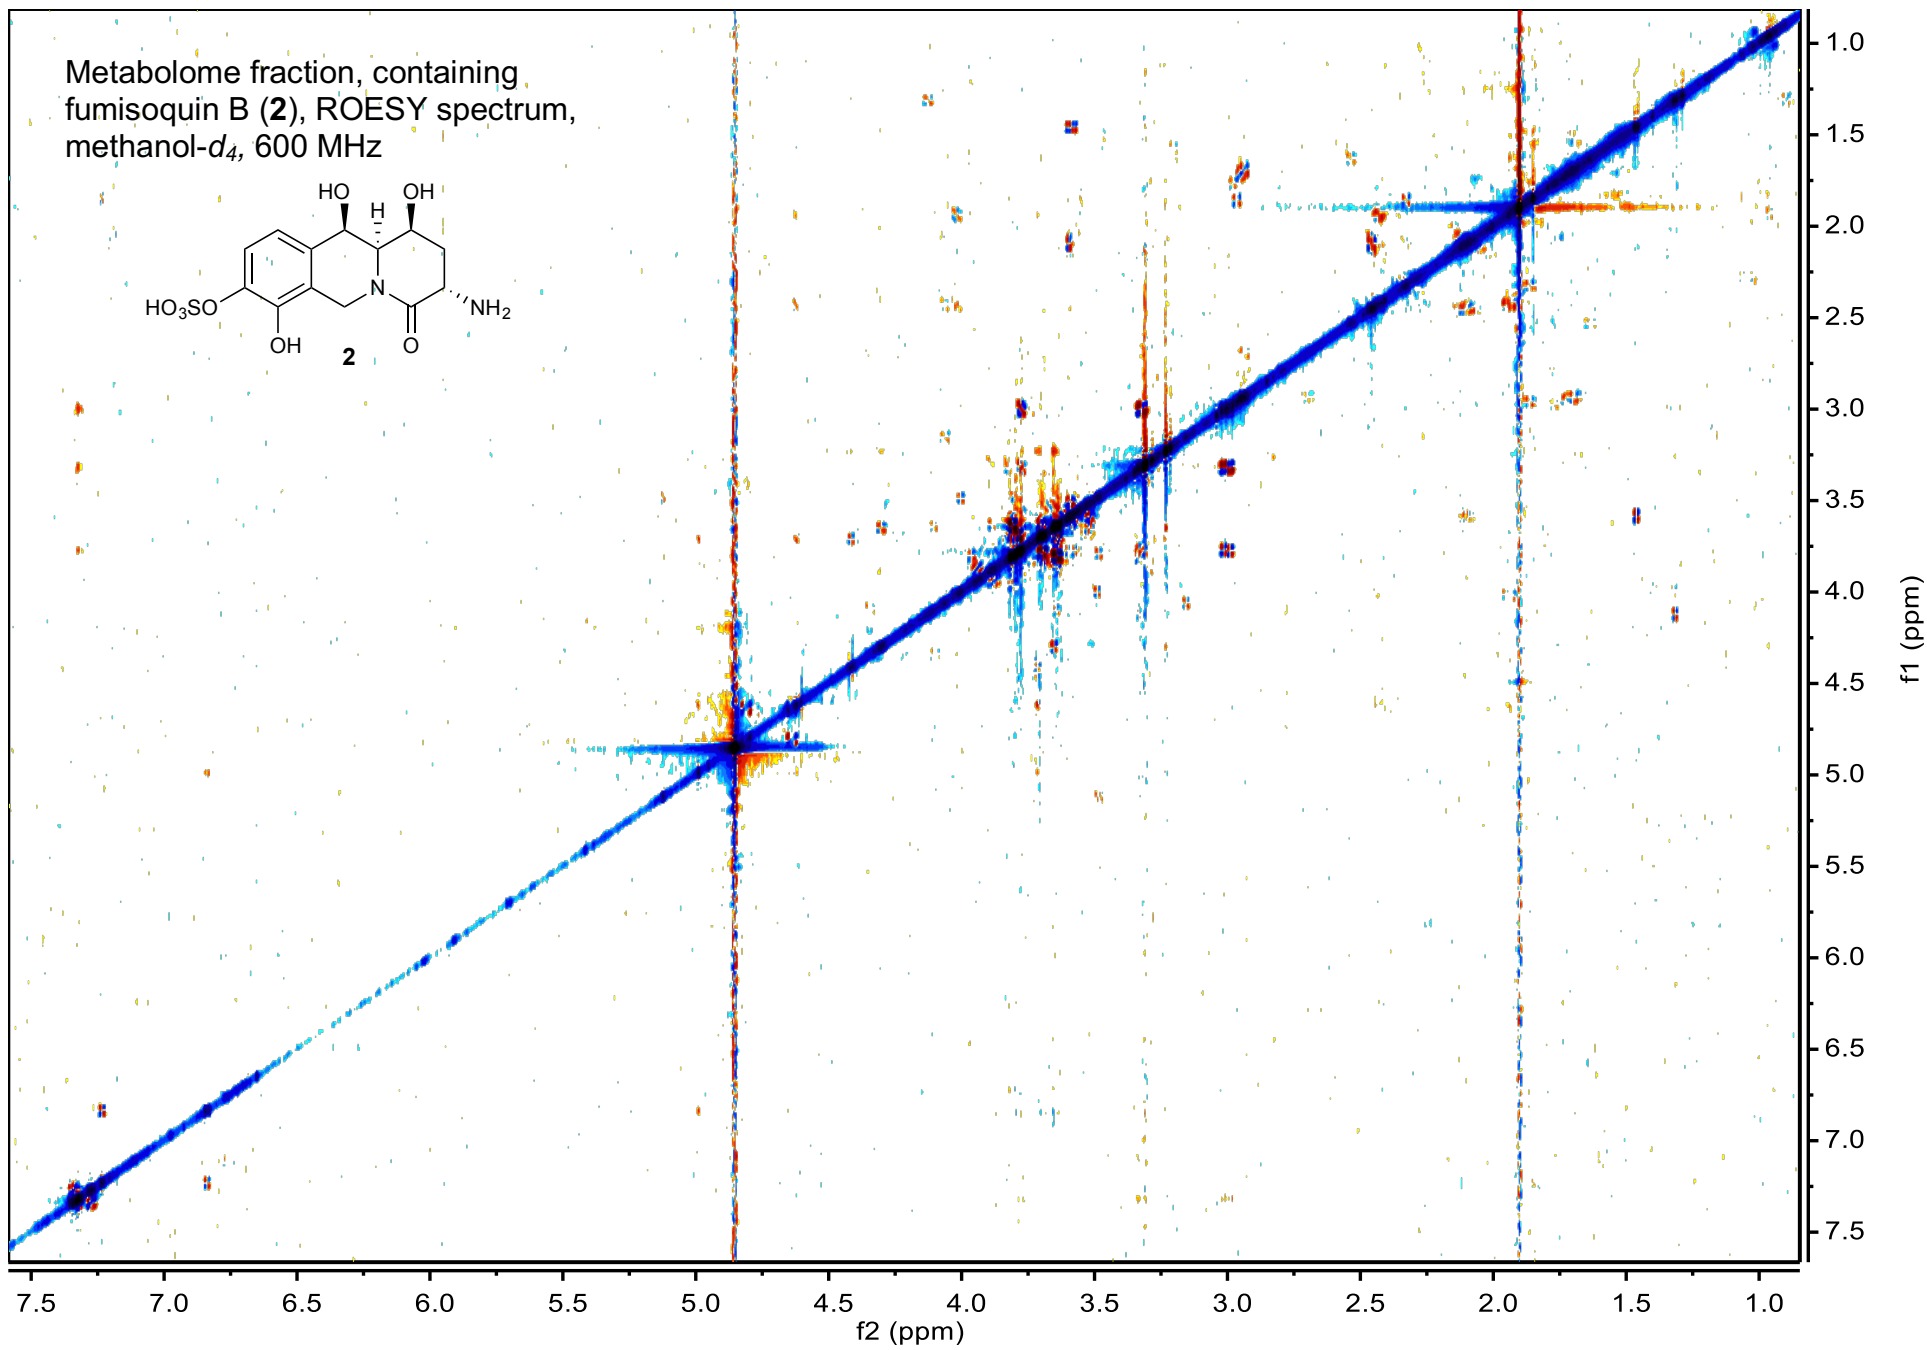

**$^1\text{H}$  and  $^{13}\text{C}$  spectroscopic data for fumisoquin C, 3, in  $\text{DMSO-}d_6$ .**

Chemical shifts were referenced to  $\delta(\text{CHD}_2\text{SOCD}_3) = 2.50$  and  $\delta(^{13}\text{C}\text{H}_2\text{SOCD}_3) = 39.52$ .  $^{13}\text{C}$  chemical shifts were determined via HMBC and HSQC spectra. Spectra were acquired using the Varian INOVA 600 spectrometer, except for the HSQC, which was acquired using the Bruker Avance 800 spectrometer.  $^1\text{H}$ ,  $^1\text{H}$ - $J$ -coupling constants were determined from the acquired  $^1\text{H}$  spectrum. NOESY correlations were observed using a mixing time of 600 ms. HMBC correlations are from the proton(s) stated to the indicated  $^{13}\text{C}$  atom.

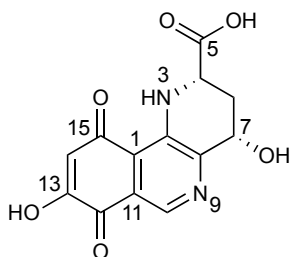

| No.             | $\delta_c$ | Proton | $\delta\text{H}$ ( $J_{\text{HH}}$ [Hz])                         | HMBC                 | NOESY |
|-----------------|------------|--------|------------------------------------------------------------------|----------------------|-------|
| 1               | 115.62     |        |                                                                  |                      |       |
| 2               | 138.33     |        |                                                                  |                      |       |
| 3               |            | 3-NH   | 9.46 ( $J_{3,4} = 1.5$ )                                         | 1, 4, 5, 6, 8        | 4     |
| 4               | 53.27      | 4-H    | 3.73 ( $J_{4,3} = 1.5$ , $J_{4,6a} = 9.6$ , $J_{4,6b} = 5.4$ )   | 2, 5, 6, 7           | 3, 7  |
| 5               | 173.40     |        |                                                                  |                      |       |
| 6               | 32.31      | 6-Ha   | 1.69 ( $J_{6a,4} = 12$ , $J_{6a,6b} = 12.8$ , $J_{6a,7} = 9.5$ ) | 4, 5, 7, 8           |       |
|                 |            | 6-Hb   | 2.38 ( $J_{6b,4} = 12$ , $J_{6a,6b} = 12.8$ , $J_{6b,7} = 5.3$ ) | 4, 5, 7, 8           |       |
| 7               | 66.85      | 7-H    | 4.57 ( $J_{7,6a} = 9.5$ , $J_{7,6b} = 5.3$ )                     | 2, 4, 6, 8           | 4     |
| 8               | 152.69     |        |                                                                  |                      |       |
| 9               |            |        |                                                                  |                      |       |
| 10              | 130.73     | 10-H   | 7.98                                                             | 1, 8, 11, 12, 13, 15 |       |
| 11              | 124.93     |        |                                                                  |                      |       |
| 12              | 188.04     |        |                                                                  |                      |       |
| 13 <sup>a</sup> | 184.60     |        |                                                                  |                      |       |
| 14              | 107.92     | 14-H   | 5.24                                                             | 1, 12, 13, 15        |       |
| 15 <sup>a</sup> | 170.85     |        |                                                                  |                      |       |

<sup>a</sup>Position 13 and 15 carbon chemical shifts are interchangeable

Fumisoquin C (**3**), containing about 40% of decomposition product **4**,  $^1\text{H}$  NMR spectrum, methanol- $d_4$ , 600 MHz

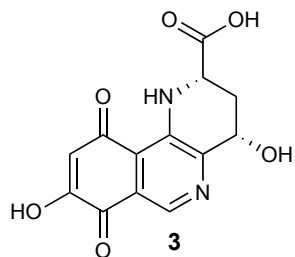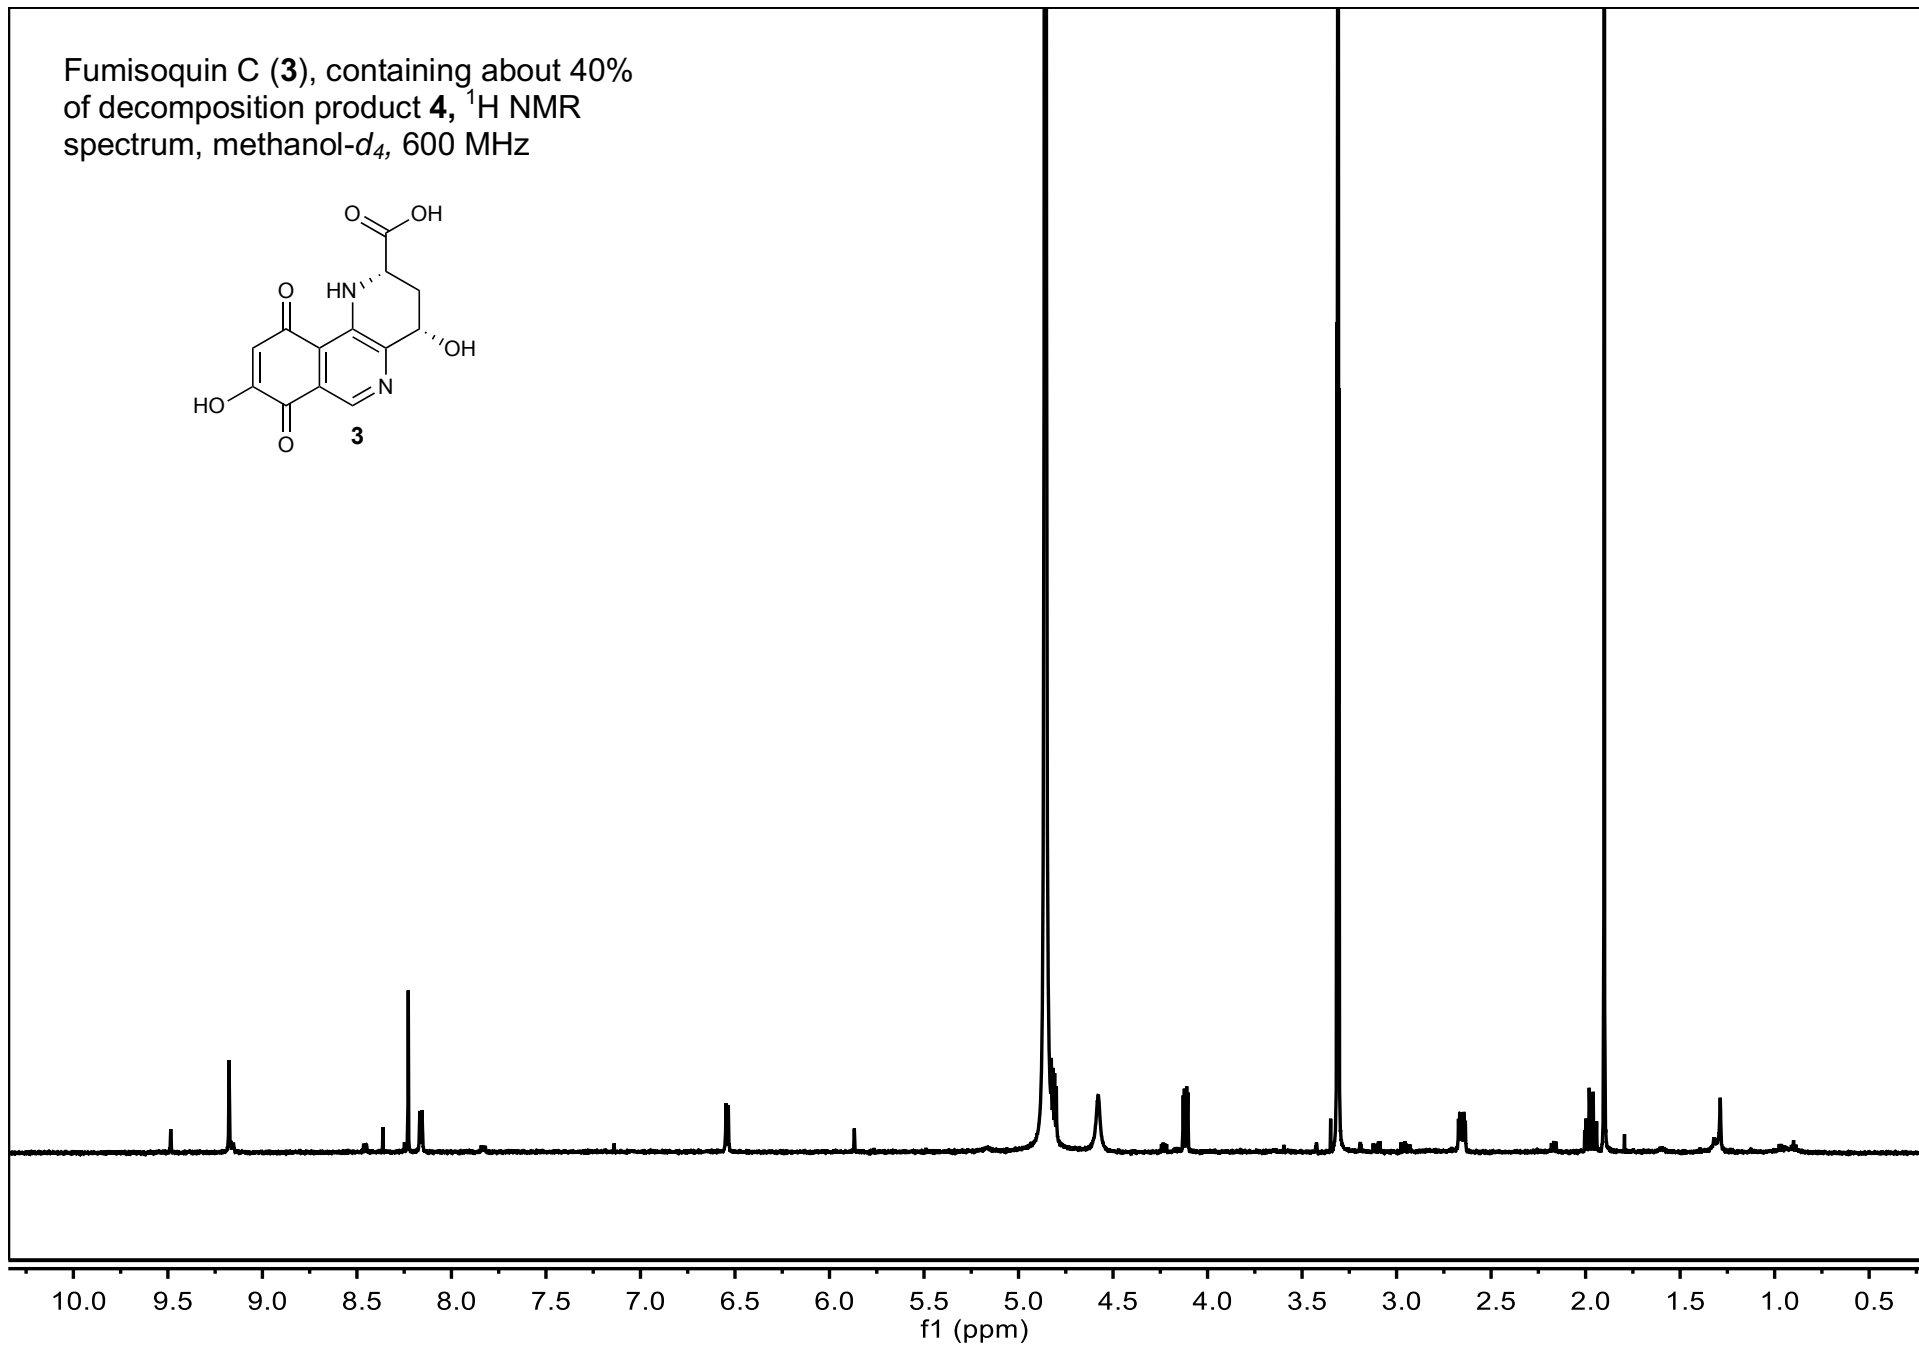

Fumisoquin C (**3**), containing about 40% of decomposition product **4**, dqfCOSY spectrum, methanol-*d*<sub>4</sub>, 600 MHz

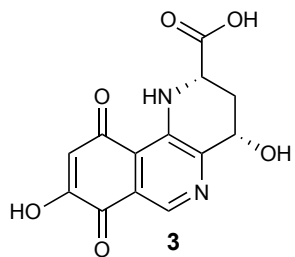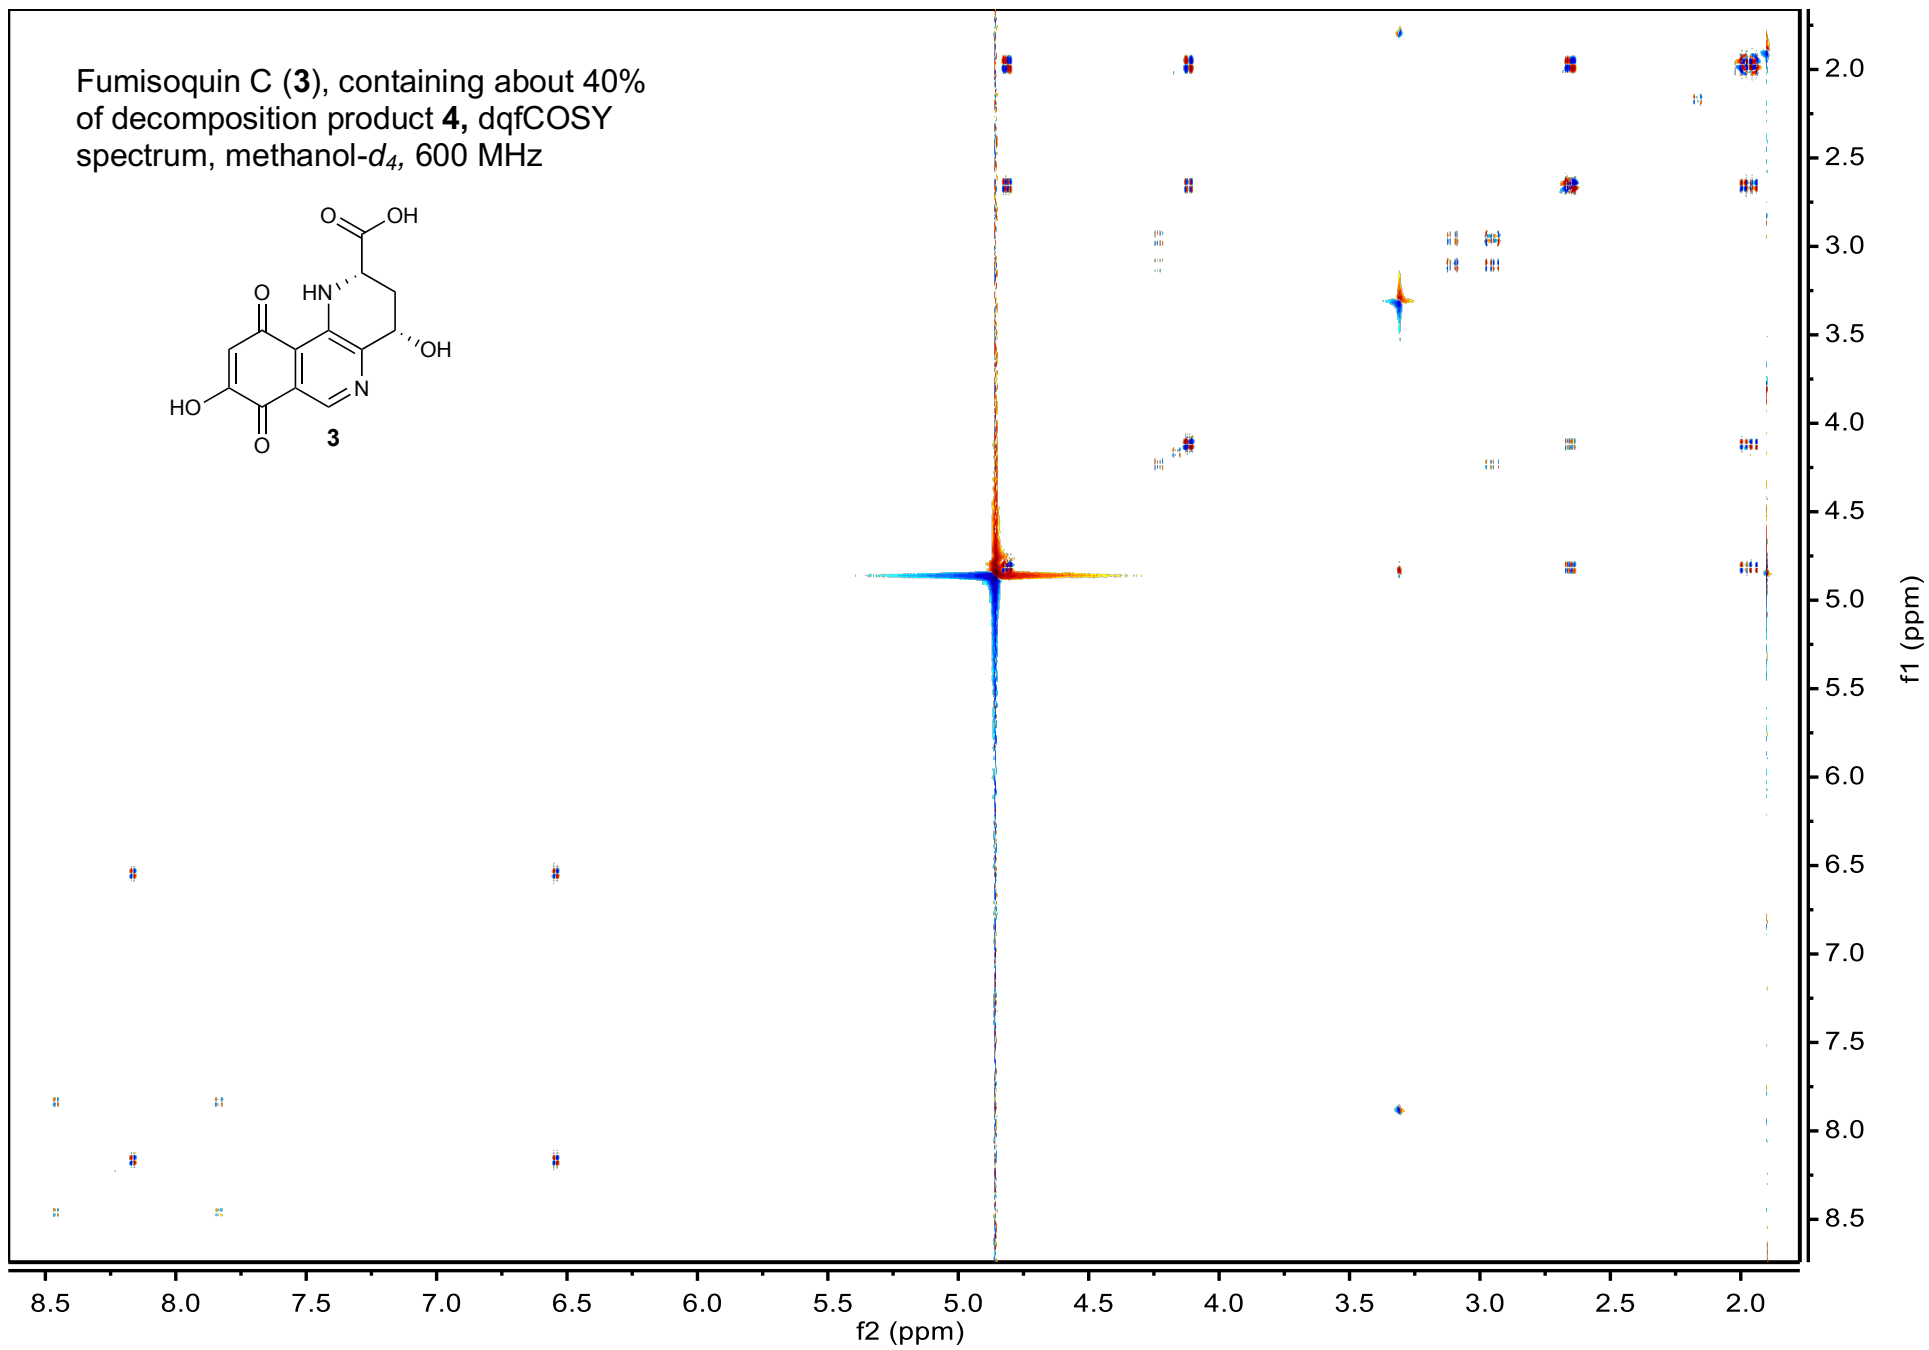

Fumisoquin C (**3**), containing about 40% of decomposition product **4**,  $^1\text{H}$  NMR spectrum, DMSO- $d_6$ , 600 MHz

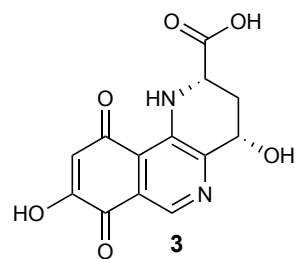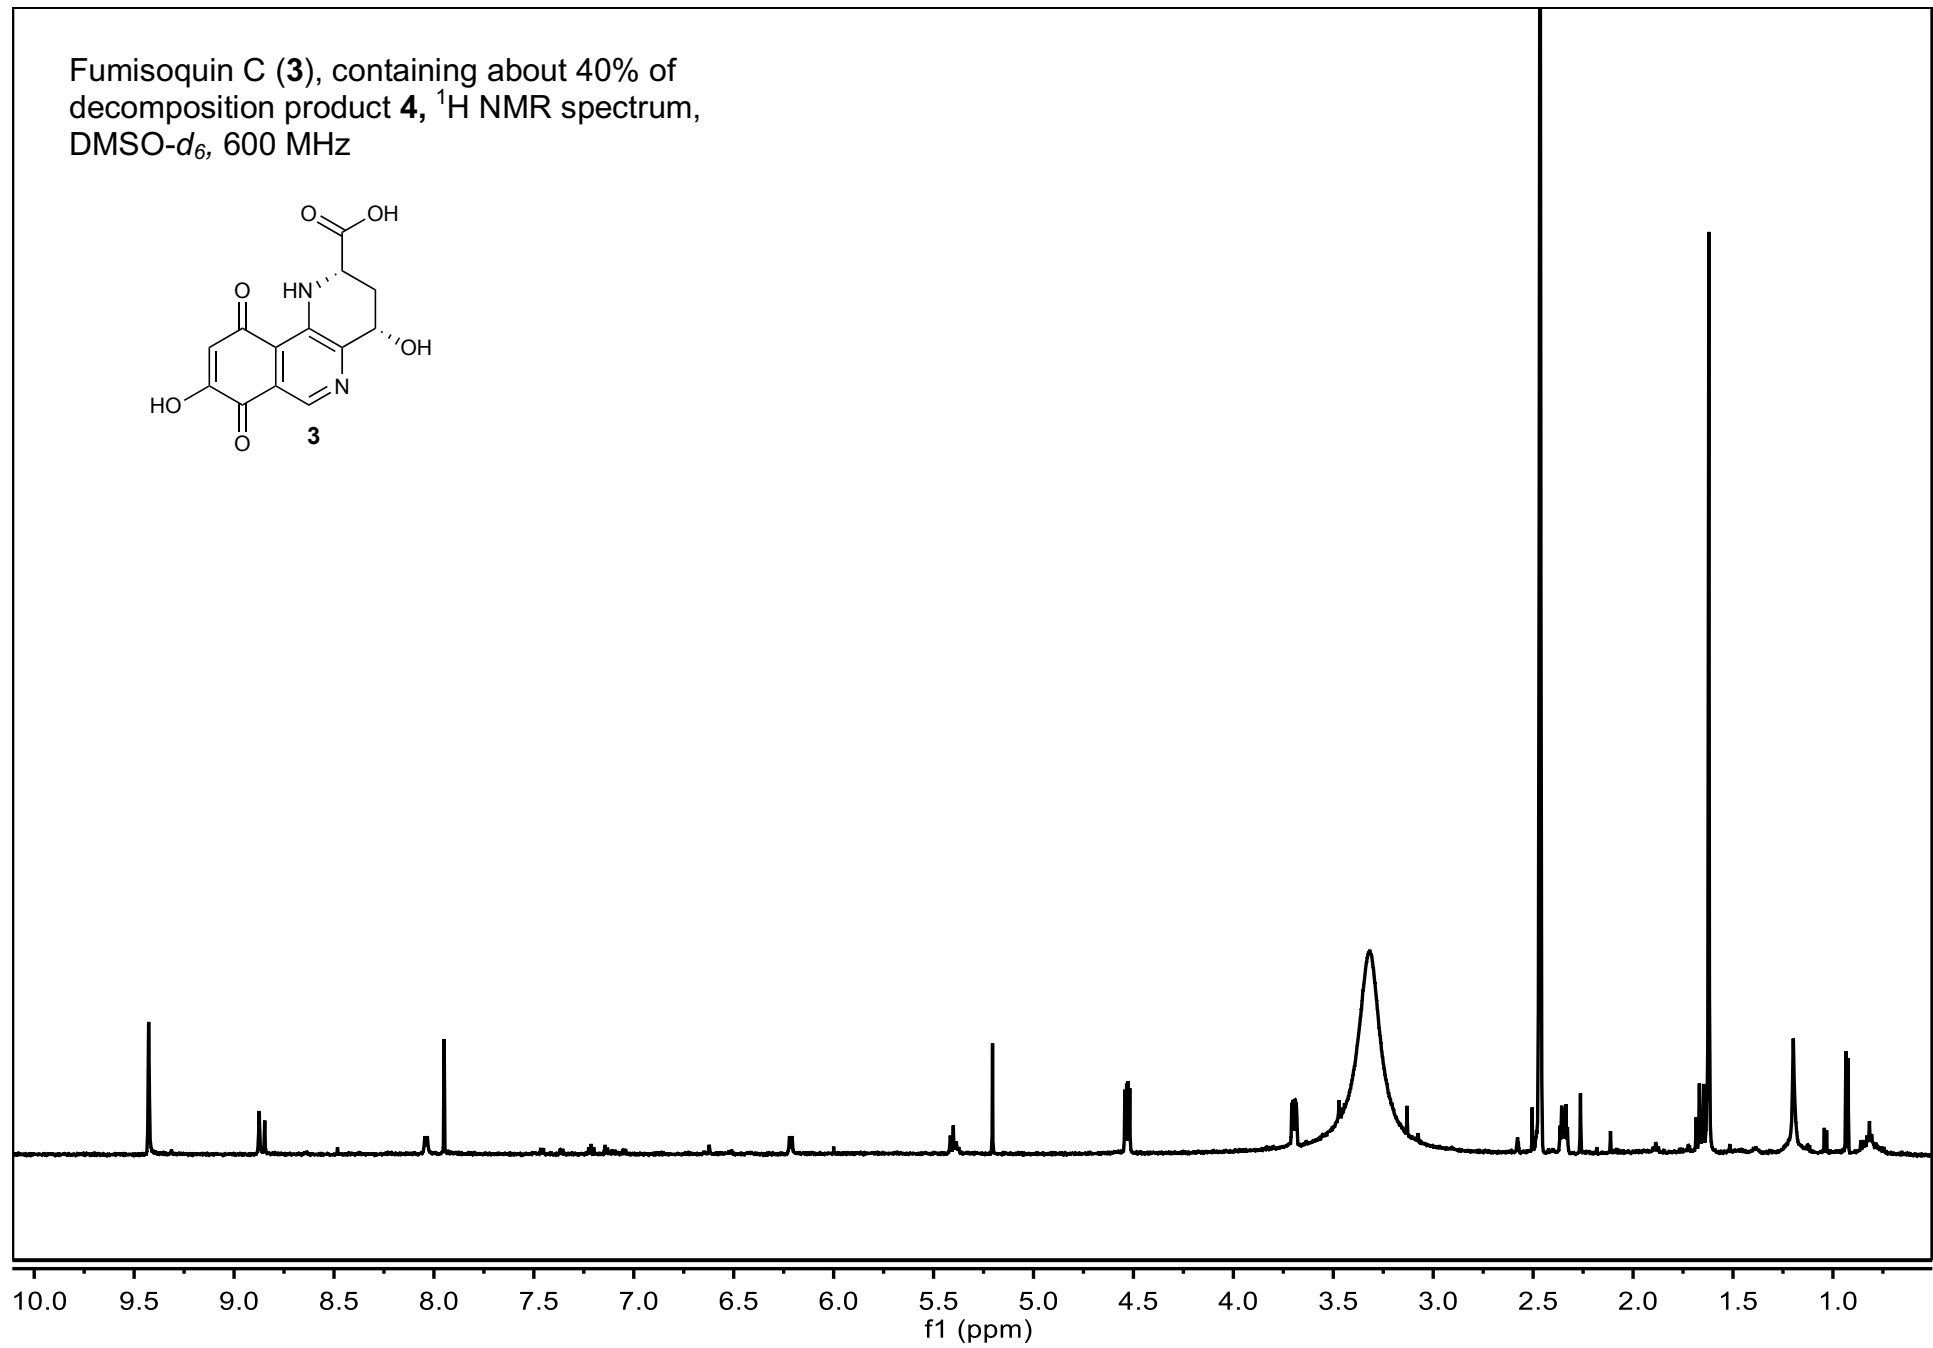



Fumisoquin C (**3**), containing about 40% of decomposition product **4**, coupled HSQC spectrum, DMSO-*d*<sub>6</sub>, 800 MHz

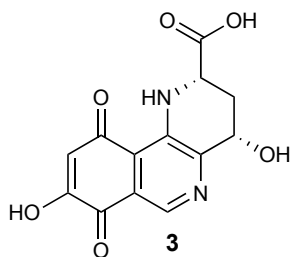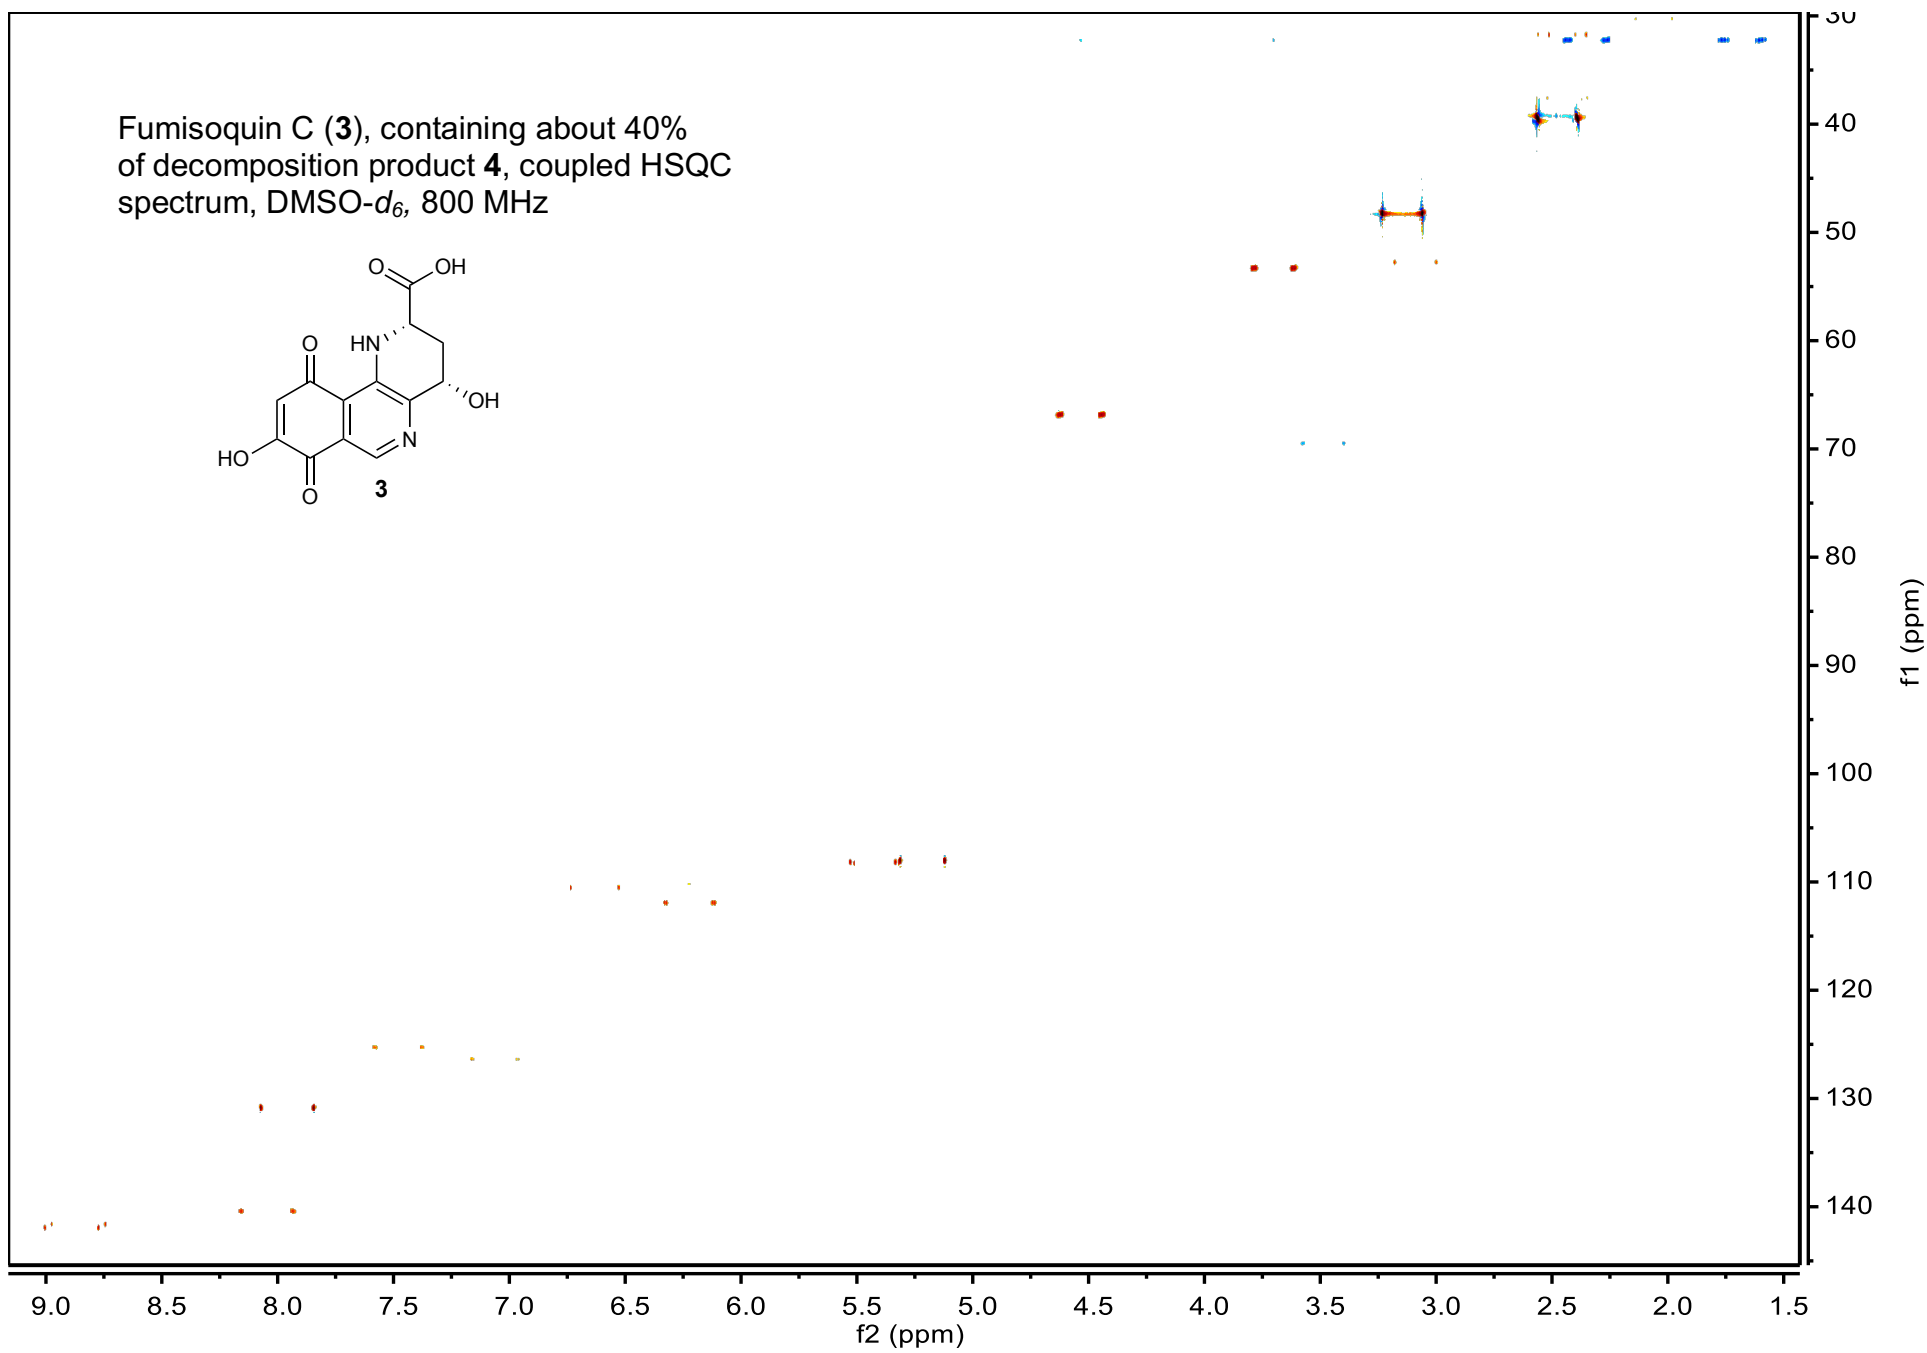

Fumisoquin C (**3**), containing about 40% of decomposition product **4**,  
HMBC spectrum, DMSO- $d_6$ , 600 MHz

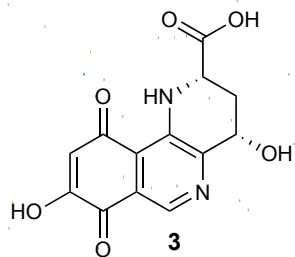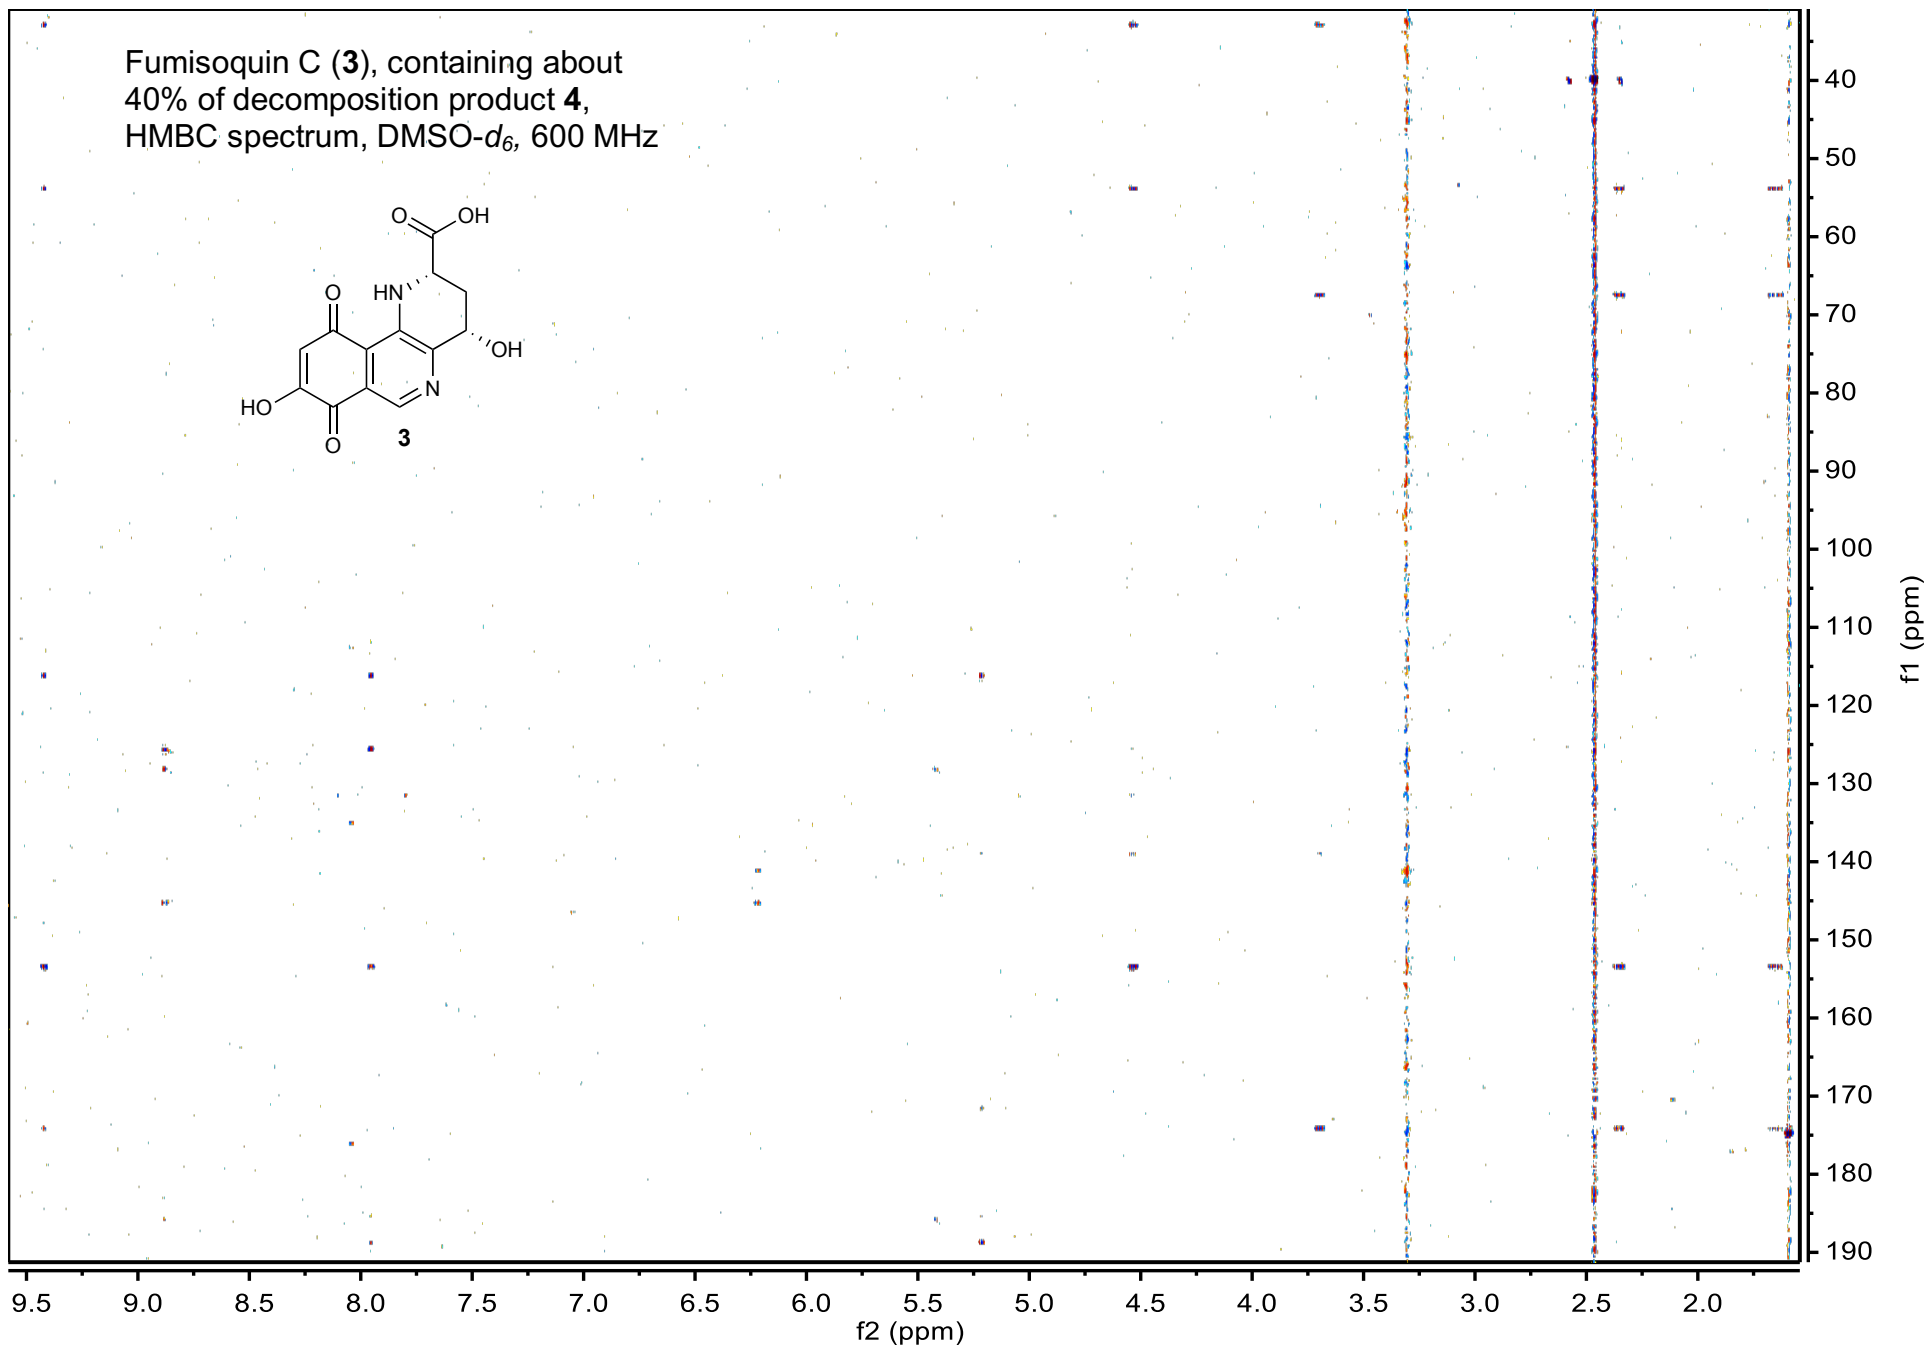

Fumisoquin C (**3**), containing about 40% of decomposition product **4**,  
NOESY spectrum, DMSO-*d*<sub>6</sub>, 600 MHz

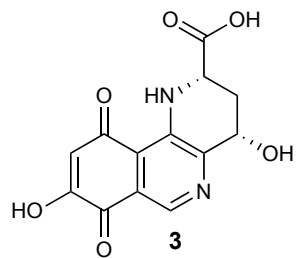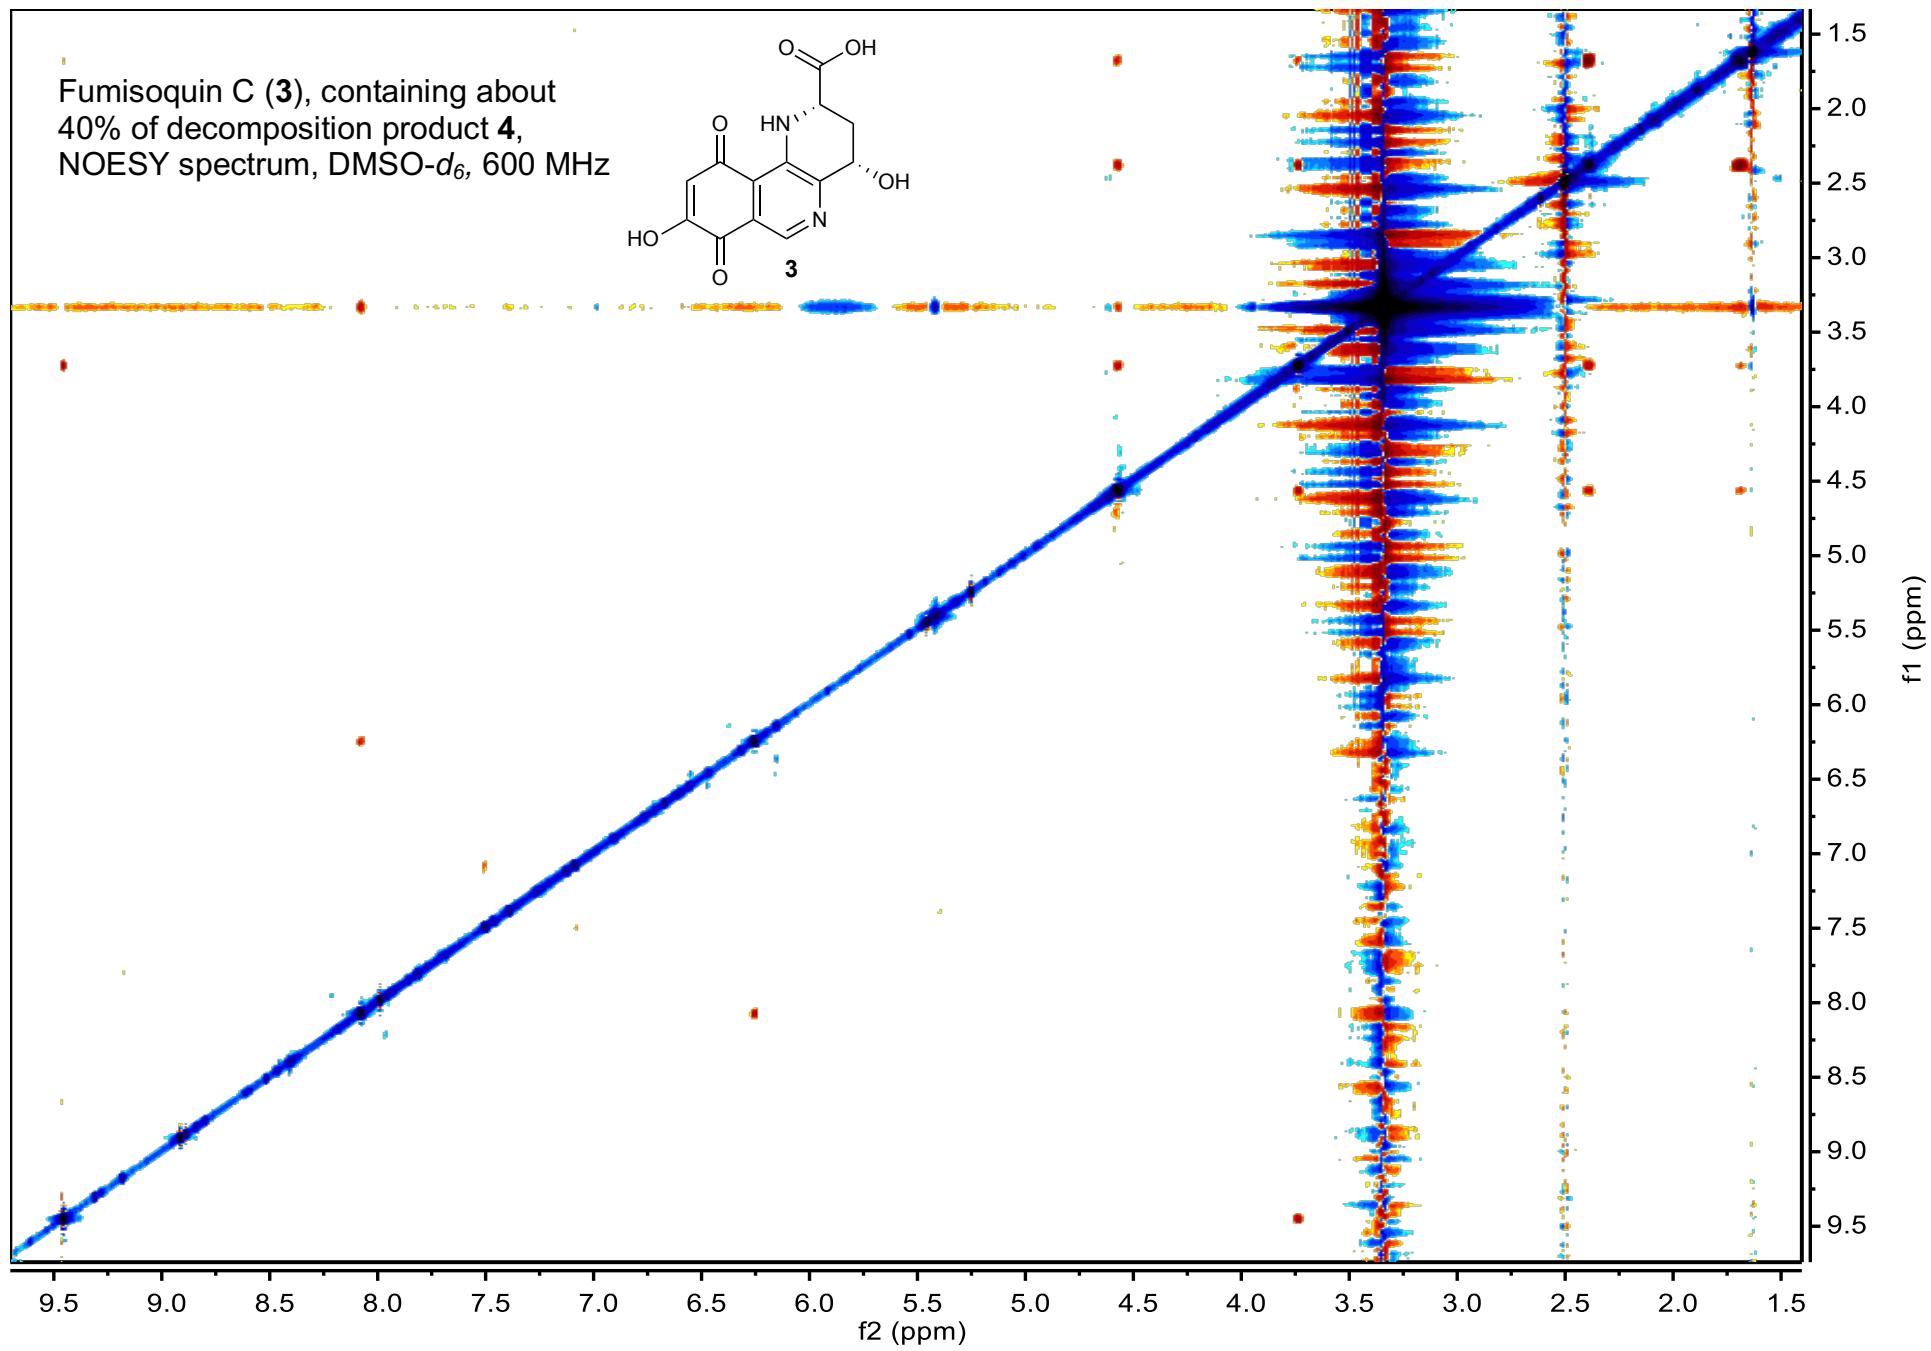

**<sup>1</sup>H (800 MHz) and <sup>13</sup>C (200 MHz) NMR spectroscopic data for dimethyl-fumisoquin C (dimethyl-3) in DMSO-*d*<sub>6</sub>.**

Chemical shifts were referenced to  $\delta(\text{CHD}_2\text{SOCD}_3) = 2.50$  and  $\delta(^{13}\text{CHD}_2\text{SOCD}_3) = 39.52$ . <sup>13</sup>C chemical shifts were determined via HMBC and HSQC spectra. <sup>1</sup>H, <sup>1</sup>H-*J*-coupling constants were determined from the acquired <sup>1</sup>H spectrum. ROESY correlations were observed using a mixing time of 600 ms. HMBC correlations are from the proton(s) stated to the indicated <sup>13</sup>C atom.

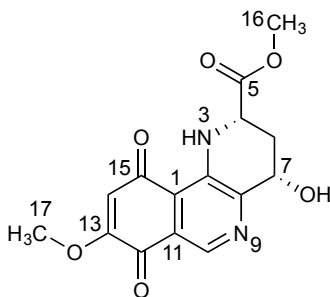

| No. | $\delta_c$ | Proton | $\delta_H$ ( $J_{HH}$ [Hz])                                               | HMBC <sup>a</sup>  | ROESY             |
|-----|------------|--------|---------------------------------------------------------------------------|--------------------|-------------------|
| 1   | 112.56     |        |                                                                           |                    |                   |
| 2   | 138.34     |        |                                                                           |                    |                   |
| 3   |            | 3-NH   | 9.22 ( $J_{3,4} = 3.8$ )                                                  | 1,2,4,6,8          | 4                 |
| 4   | 49.12      | 4-H    | 4.49 ( $J_{4,3} = 3.8$ , $J_{4,6a} = 6.3$ )<br>( $J_{4,6b} = 12.2$ )      | 2,5,6,7,8          | 3, 6a, 6b, 7      |
| 5   | 172.07     |        |                                                                           |                    |                   |
| 6   | 30.13      | 6-Ha   | 2.24 ( $J_{6a,4} = 6.3$ , $J_{6a,6b} = 13.5$ ,<br>$J_{6a,7} = 3.6$ )      | 4,5,7,8            | 4, 6b, 7          |
|     |            | 6-Hb   | 2.38 ( $J_{6b,4} = 12.2$ , $J_{6a,6b} =$<br>$13.5$ ) ( $J_{6b,7} = 9.0$ ) | 4,5,7,8            | 4, 6a, 7          |
| 7   | 65.09      | 7-H    | 4.69 ( $J_{7,6a} = 3.6$ , $J_{7,6b} = 9.0$ )                              |                    | 4, 6a, 6b,<br>7OH |
| 7   |            | 7-OH   | 5.61 ( $J_{7OH,7} = 4.2$ )                                                | 2,4,8              | 7                 |
| 8   | 153.51     |        |                                                                           |                    |                   |
| 9   |            |        |                                                                           |                    |                   |
| 10  | 132.52     | 10-H   | 8.31                                                                      | 1,2w,8,11,12,13,15 |                   |
| 11  | 123.43     |        |                                                                           |                    |                   |
| 12  | 179.63     |        |                                                                           |                    |                   |
| 13  | 159.07     |        |                                                                           |                    |                   |
| 14  | 111.20     | 14-H   | 6.32                                                                      | 1,2,12,13,15       | 17                |
| 15  | 187.38     |        |                                                                           |                    |                   |
| 16  | 51.58      | 16-H3  | 3.63                                                                      | 5                  | 4                 |
| 17  | 56.24      | 17-H3  | 3.86                                                                      | 13,14              | 14                |

<sup>a</sup>w: weak correlation (less than ~10% of the intensity of strongest signal)

Dimethyl-3, <sup>1</sup>H NMR spectrum,  
DMSO-*d*<sub>6</sub>, 800 MHz

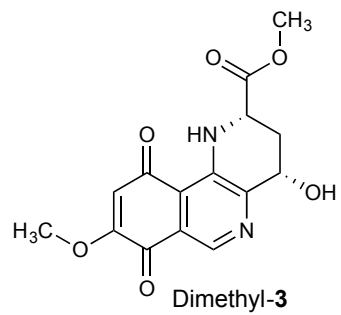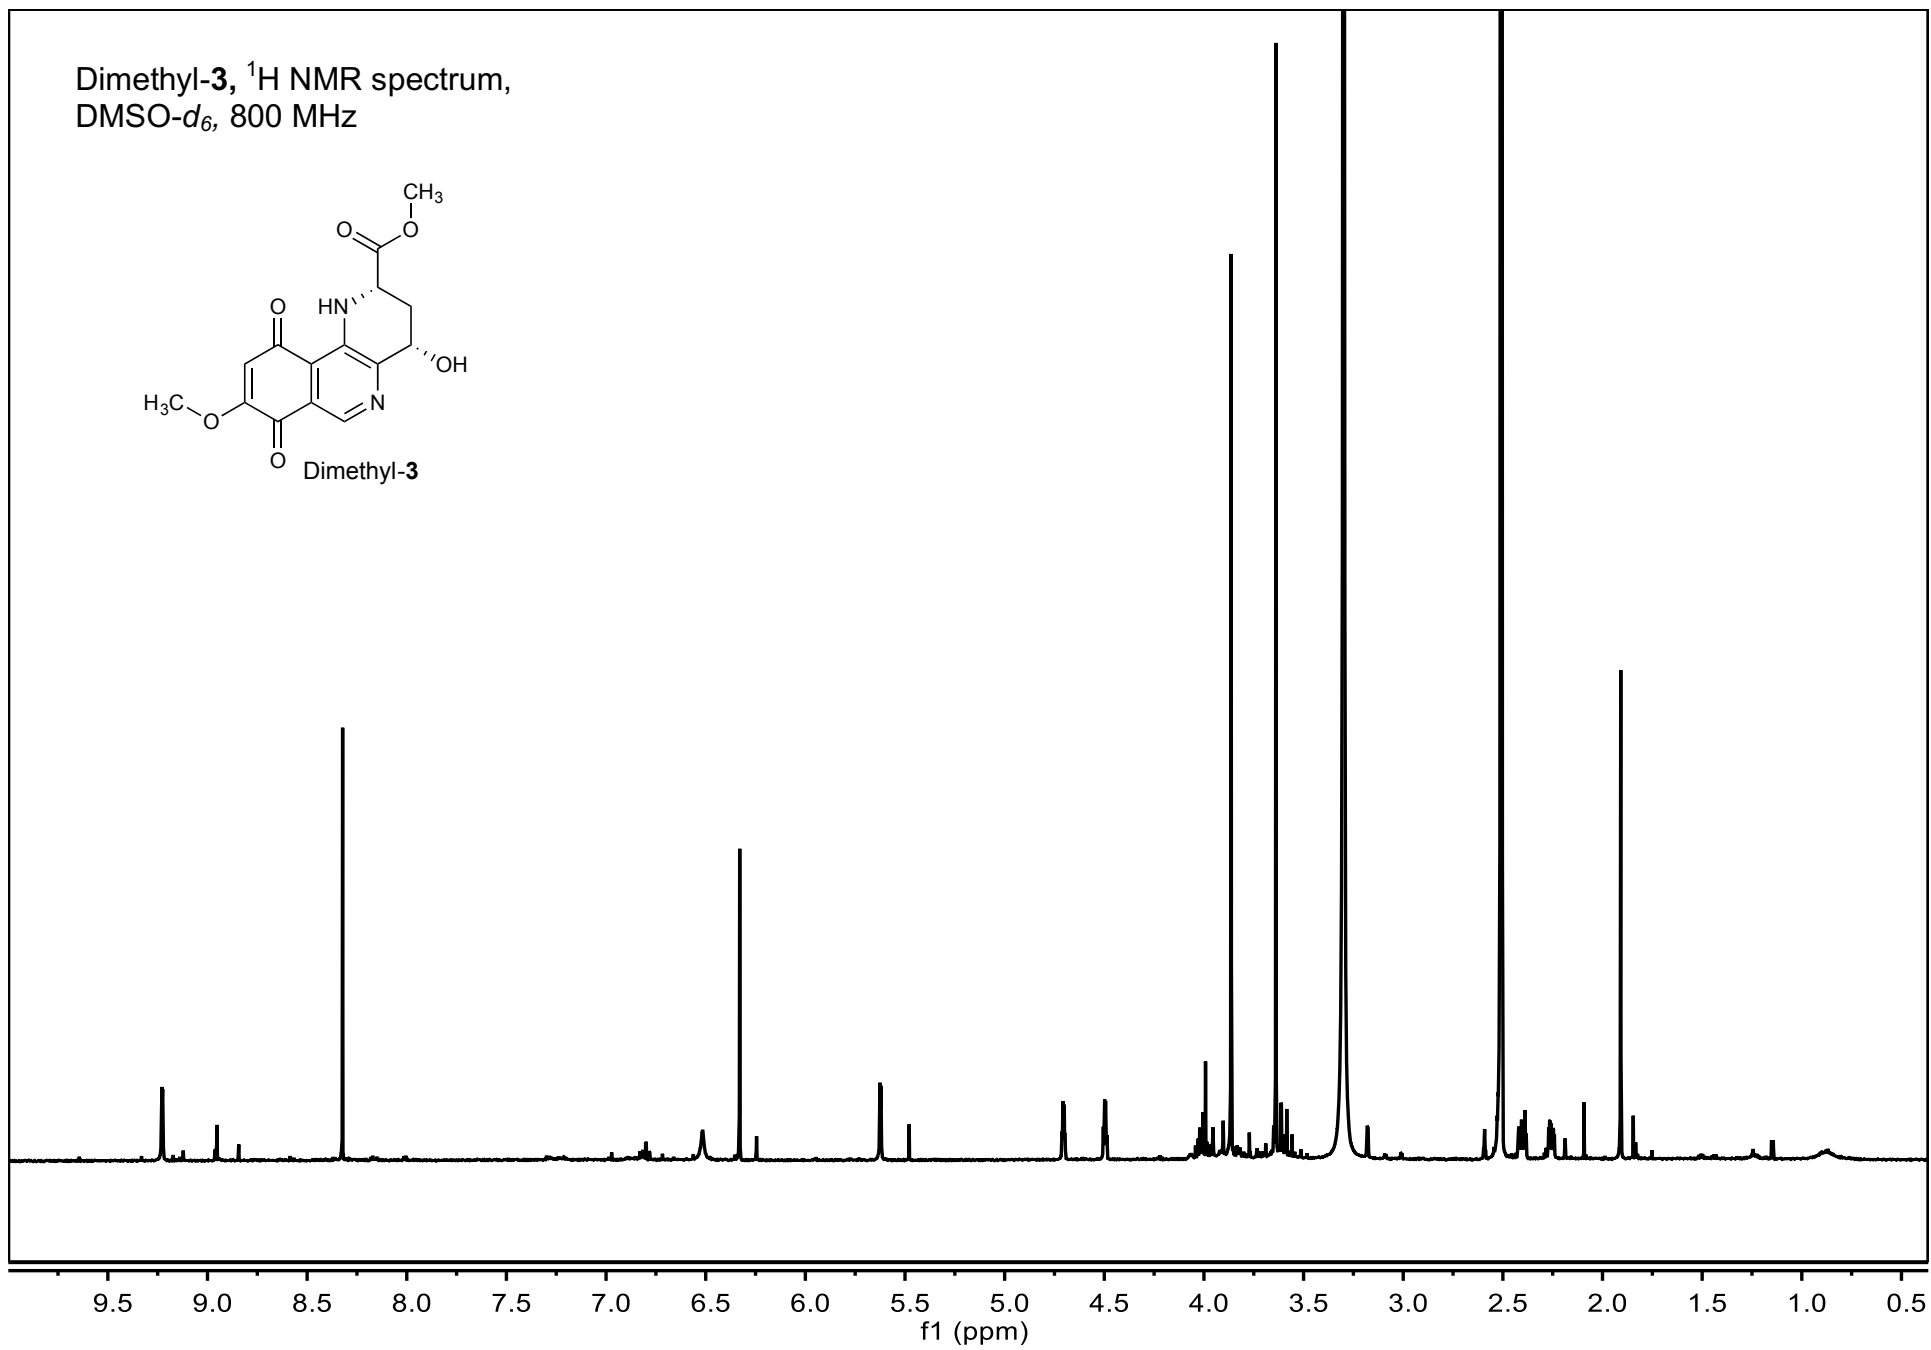

Dimethyl-3, dqfCOSY spectrum,  
DMSO-*d*<sub>6</sub>, 800 MHz

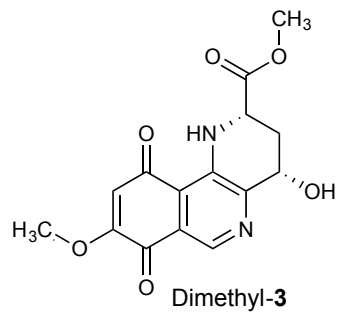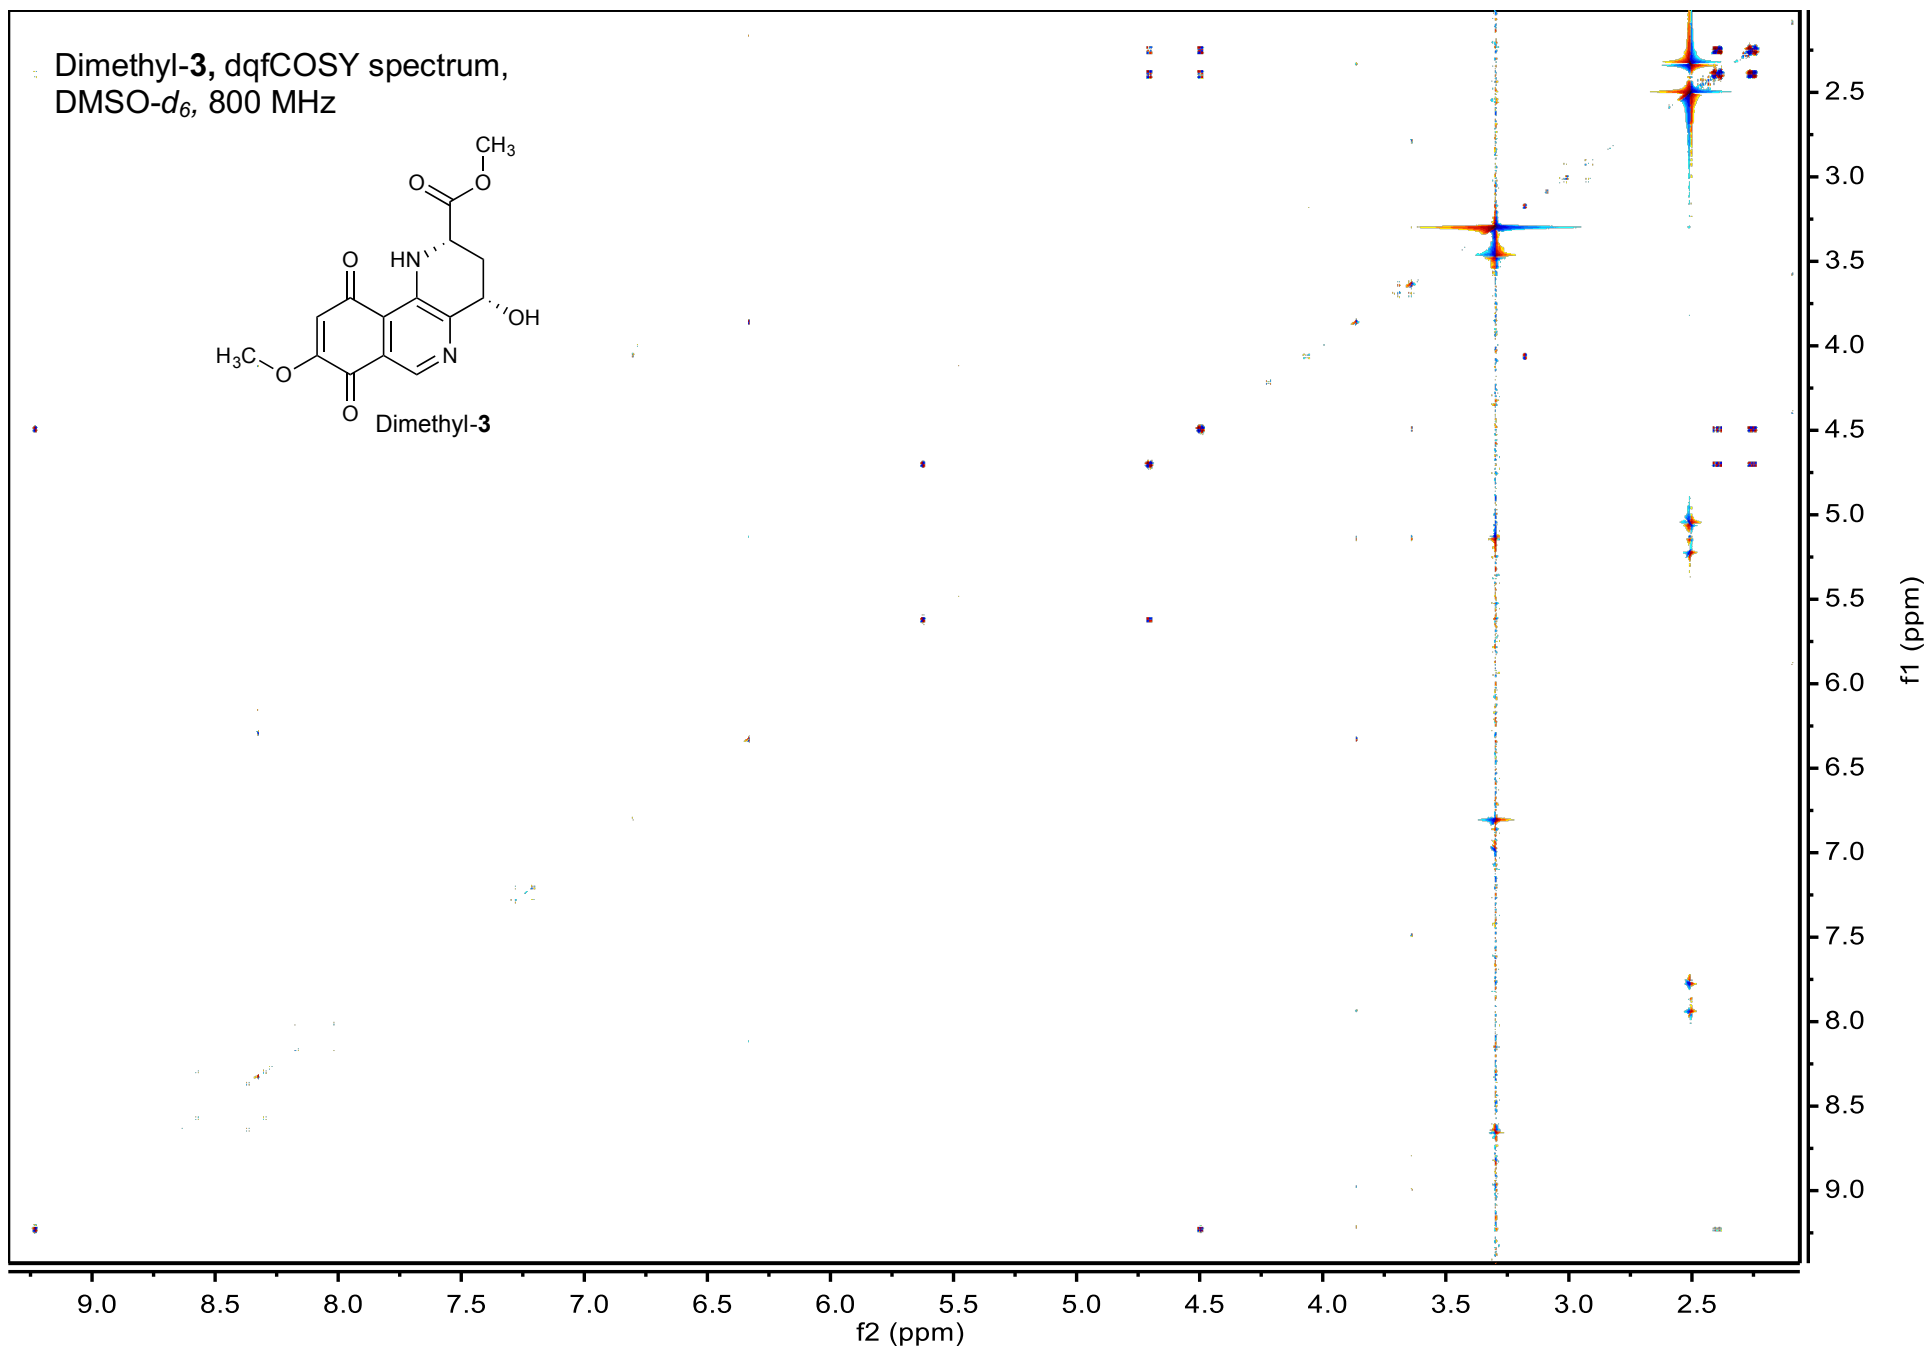

Dimethyl-3, coupled HSQC spectrum,  
DMSO-*d*<sub>6</sub>, 800 MHz

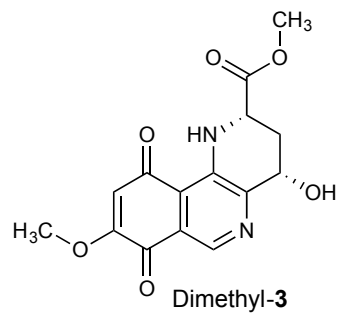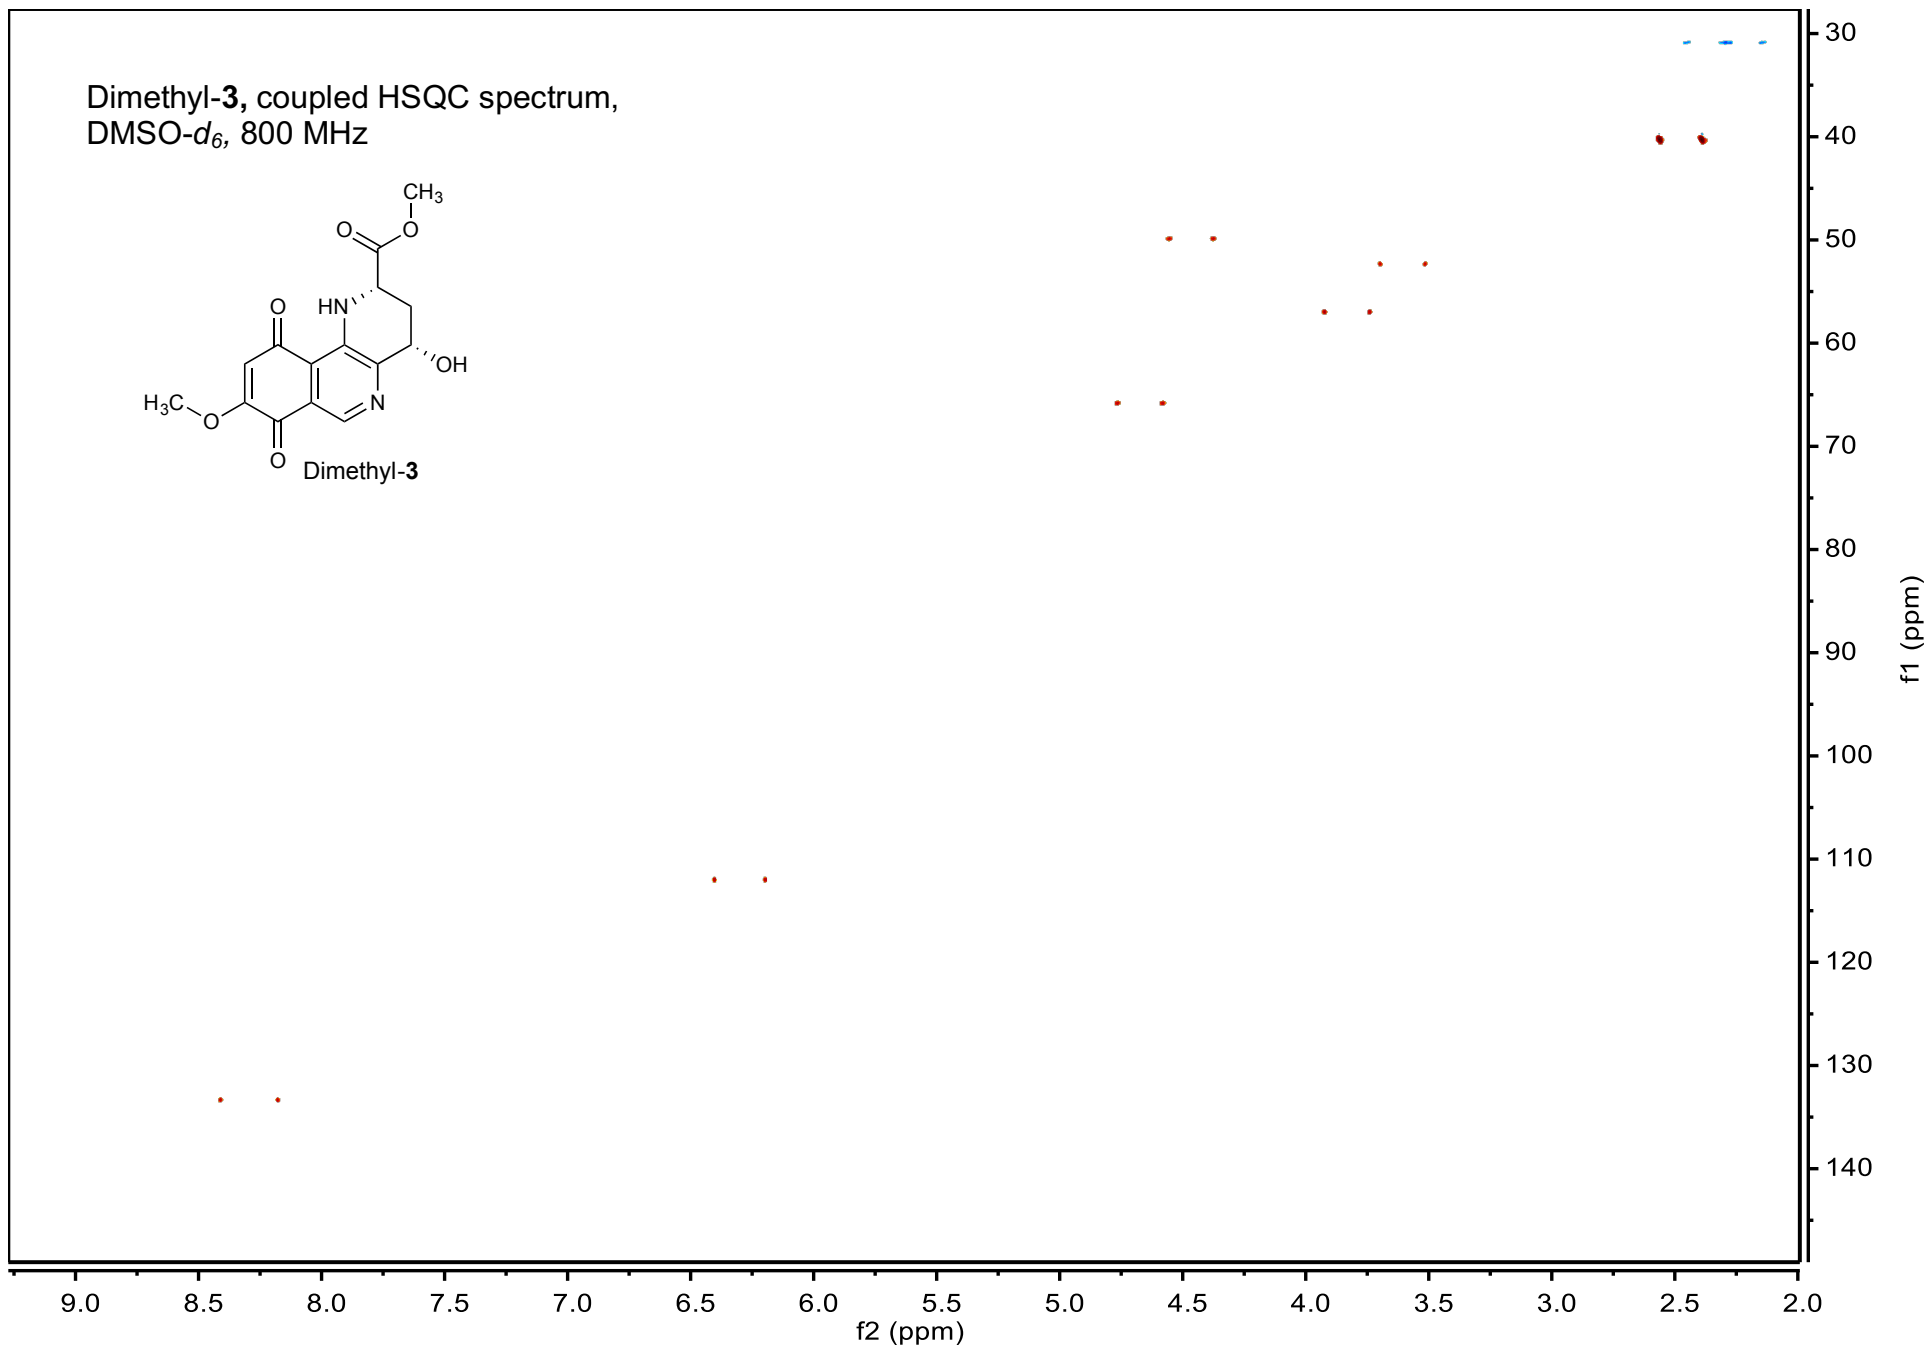

Dimethyl-3, HMBC spectrum,  
DMSO-*d*<sub>6</sub>, 800 MHz

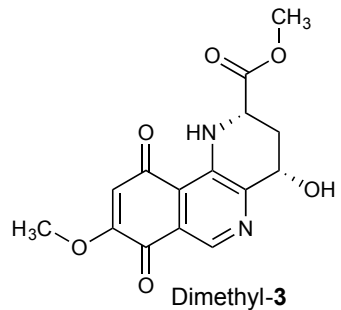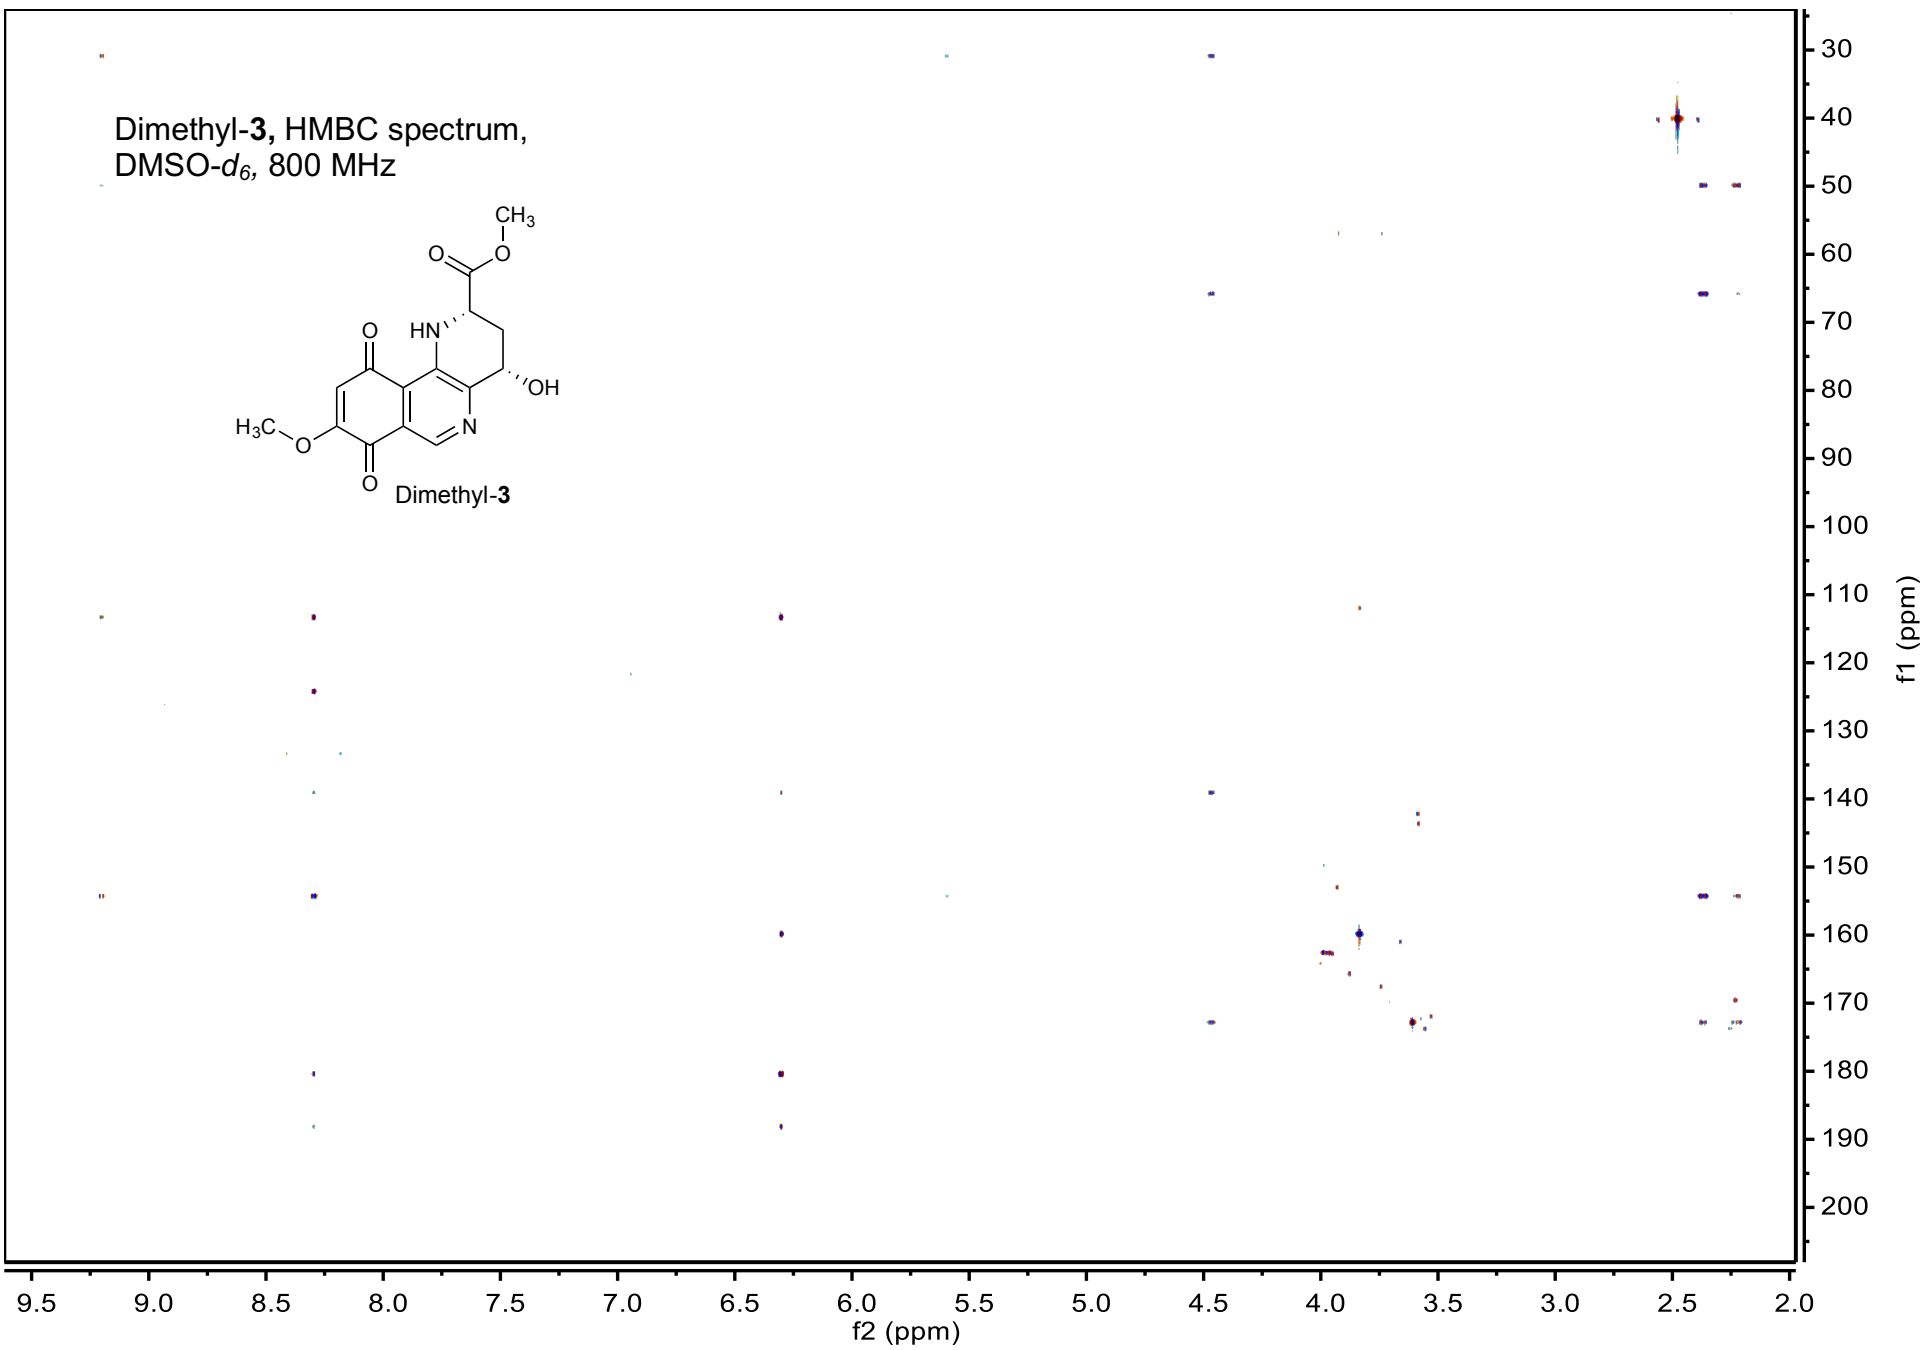



Dimethyl-3, ROESY spectrum,  
DMSO-*d*<sub>6</sub>, 800 MHz

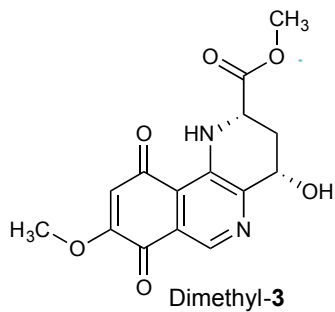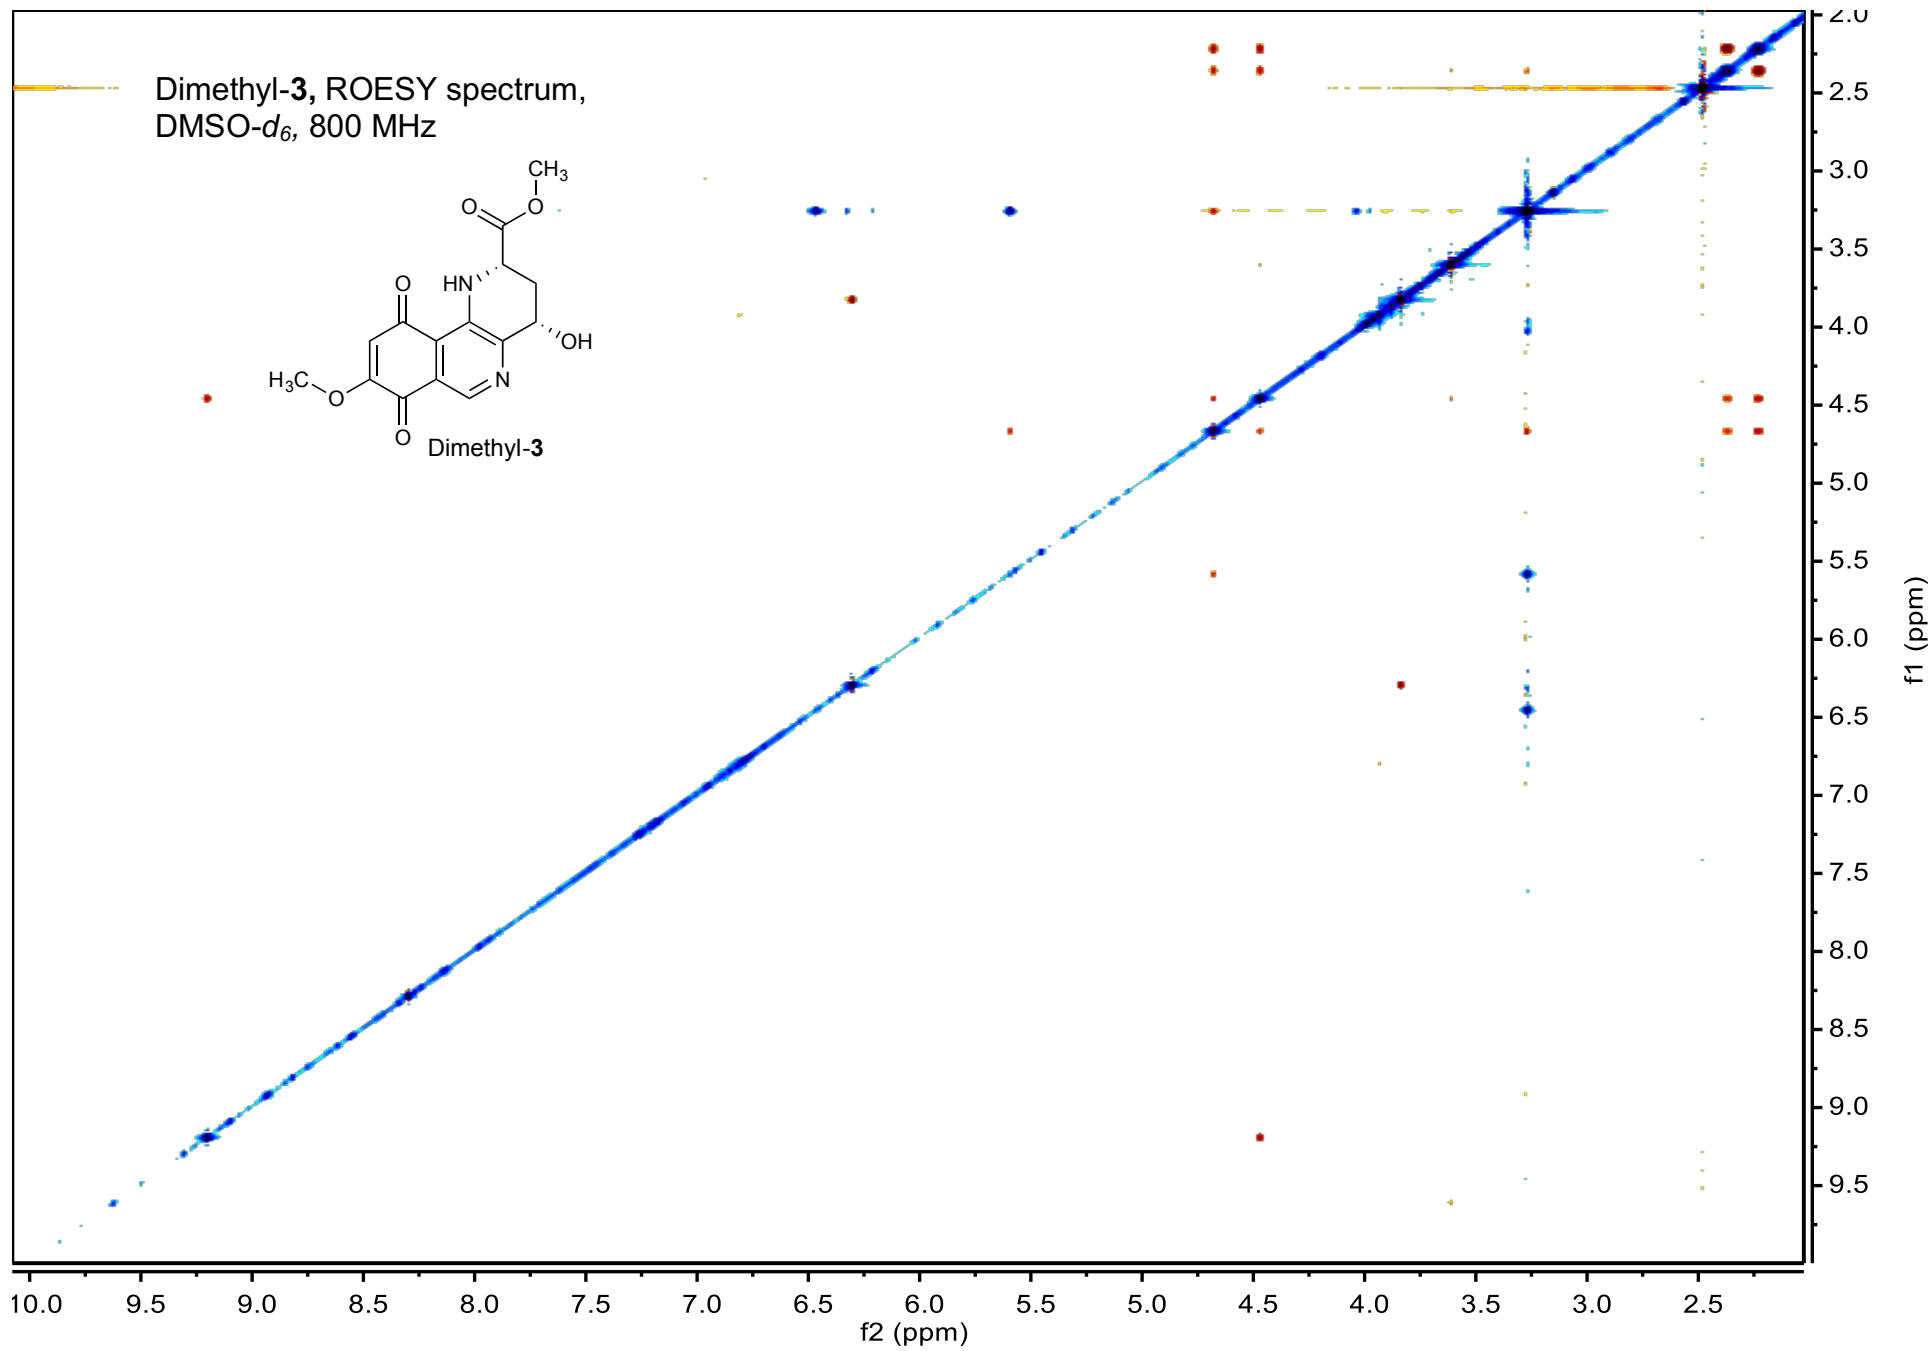

**<sup>1</sup>H (800 MHz) and <sup>13</sup>C (200 MHz) NMR spectroscopic data for compound 4 in DMSO-*d*<sub>6</sub>.**

Chemical shifts were referenced to  $\delta(\text{CHD}_2\text{SOCD}_3) = 2.50$  and  $\delta(^{13}\text{C}\text{H}_2\text{SOCD}_3) = 39.52$ . <sup>13</sup>C chemical shifts were determined via HMBC and HSQC spectra. <sup>1</sup>H, <sup>1</sup>H-*J*-coupling constants were determined from the acquired <sup>1</sup>H spectrum. HMBC correlations are from the proton(s) stated to the indicated <sup>13</sup>C atom.

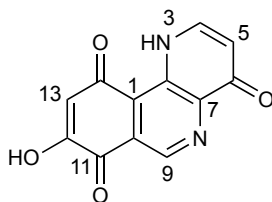

| No.             | $\delta_c$ | Proton | $\delta_H$ ( $J_{HH}$ [Hz])                 | HMBC <sup>a</sup>      |
|-----------------|------------|--------|---------------------------------------------|------------------------|
| 1               | 127.41     |        |                                             |                        |
| 2               | 134.33     |        |                                             |                        |
| 3               |            | 3-NH   | 13.71 ( $J_{3,4} = 6.6$ , $J_{3,5} = 1.7$ ) |                        |
| 4               | 140.30     | 4-H    | 8.06 ( $J_{4,3} = 6.6$ , $J_{4,5} = 7.3$ )  | 2, 5, 6                |
| 5               | 111.88     | 5-H    | 6.24 ( $J_{5,4} = 7.3$ , $J_{5,3} = 1.7$ )  | 4, 7                   |
| 6               | 175.28     |        |                                             |                        |
| 7               | 144.61     |        |                                             |                        |
| 8               |            |        |                                             |                        |
| 9               | 141.85     | 9-H    | 8.91                                        | 1, 2w, 7, 10, 11w, 12w |
| 10              | 125.00     |        |                                             |                        |
| 11              | 185.04     |        |                                             |                        |
| 12              | 180.67     |        |                                             |                        |
| 13 <sup>b</sup> | 108.10     | 13-H   | 5.45                                        | 1, 2w, 11, 12w, 14w    |
| 14 <sup>b</sup> | 172.04     |        |                                             |                        |

<sup>a</sup>w: weak correlation (less than ~10% of the intensity of strongest signals); <sup>b</sup>Position 12 and 14 carbon chemical shifts are interchangeable

Compound **4**,  $^1\text{H}$  NMR spectrum,  
DMSO- $d_6$ , 800 MHz

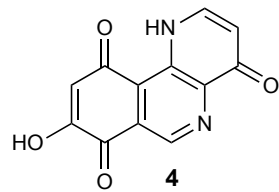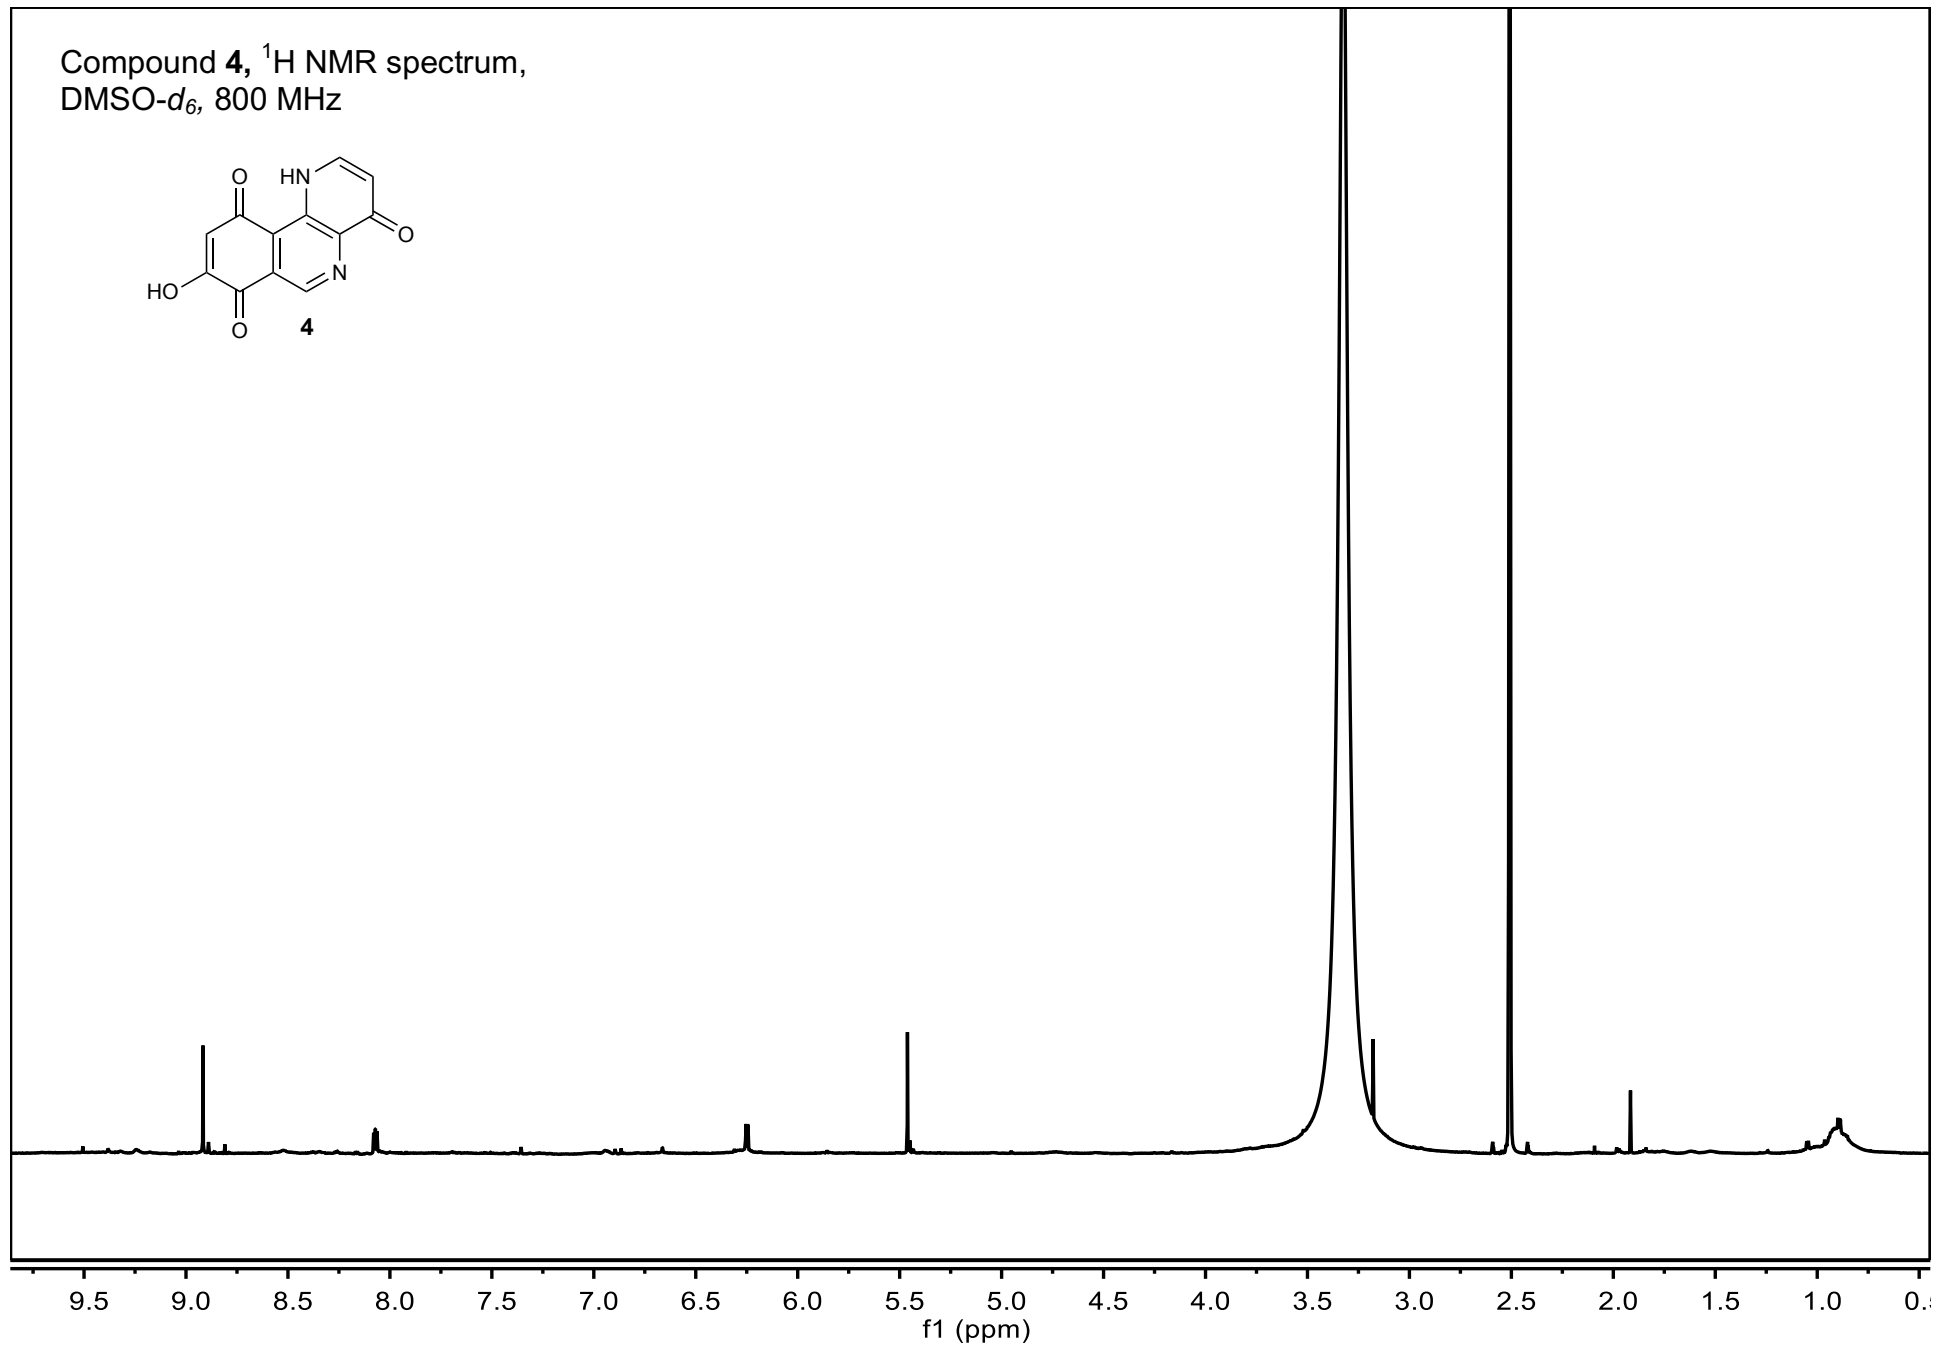

Compound **4**, dqfCOSY spectrum,  
DMSO-*d*<sub>6</sub>, 800 MHz

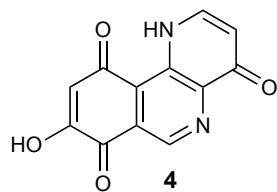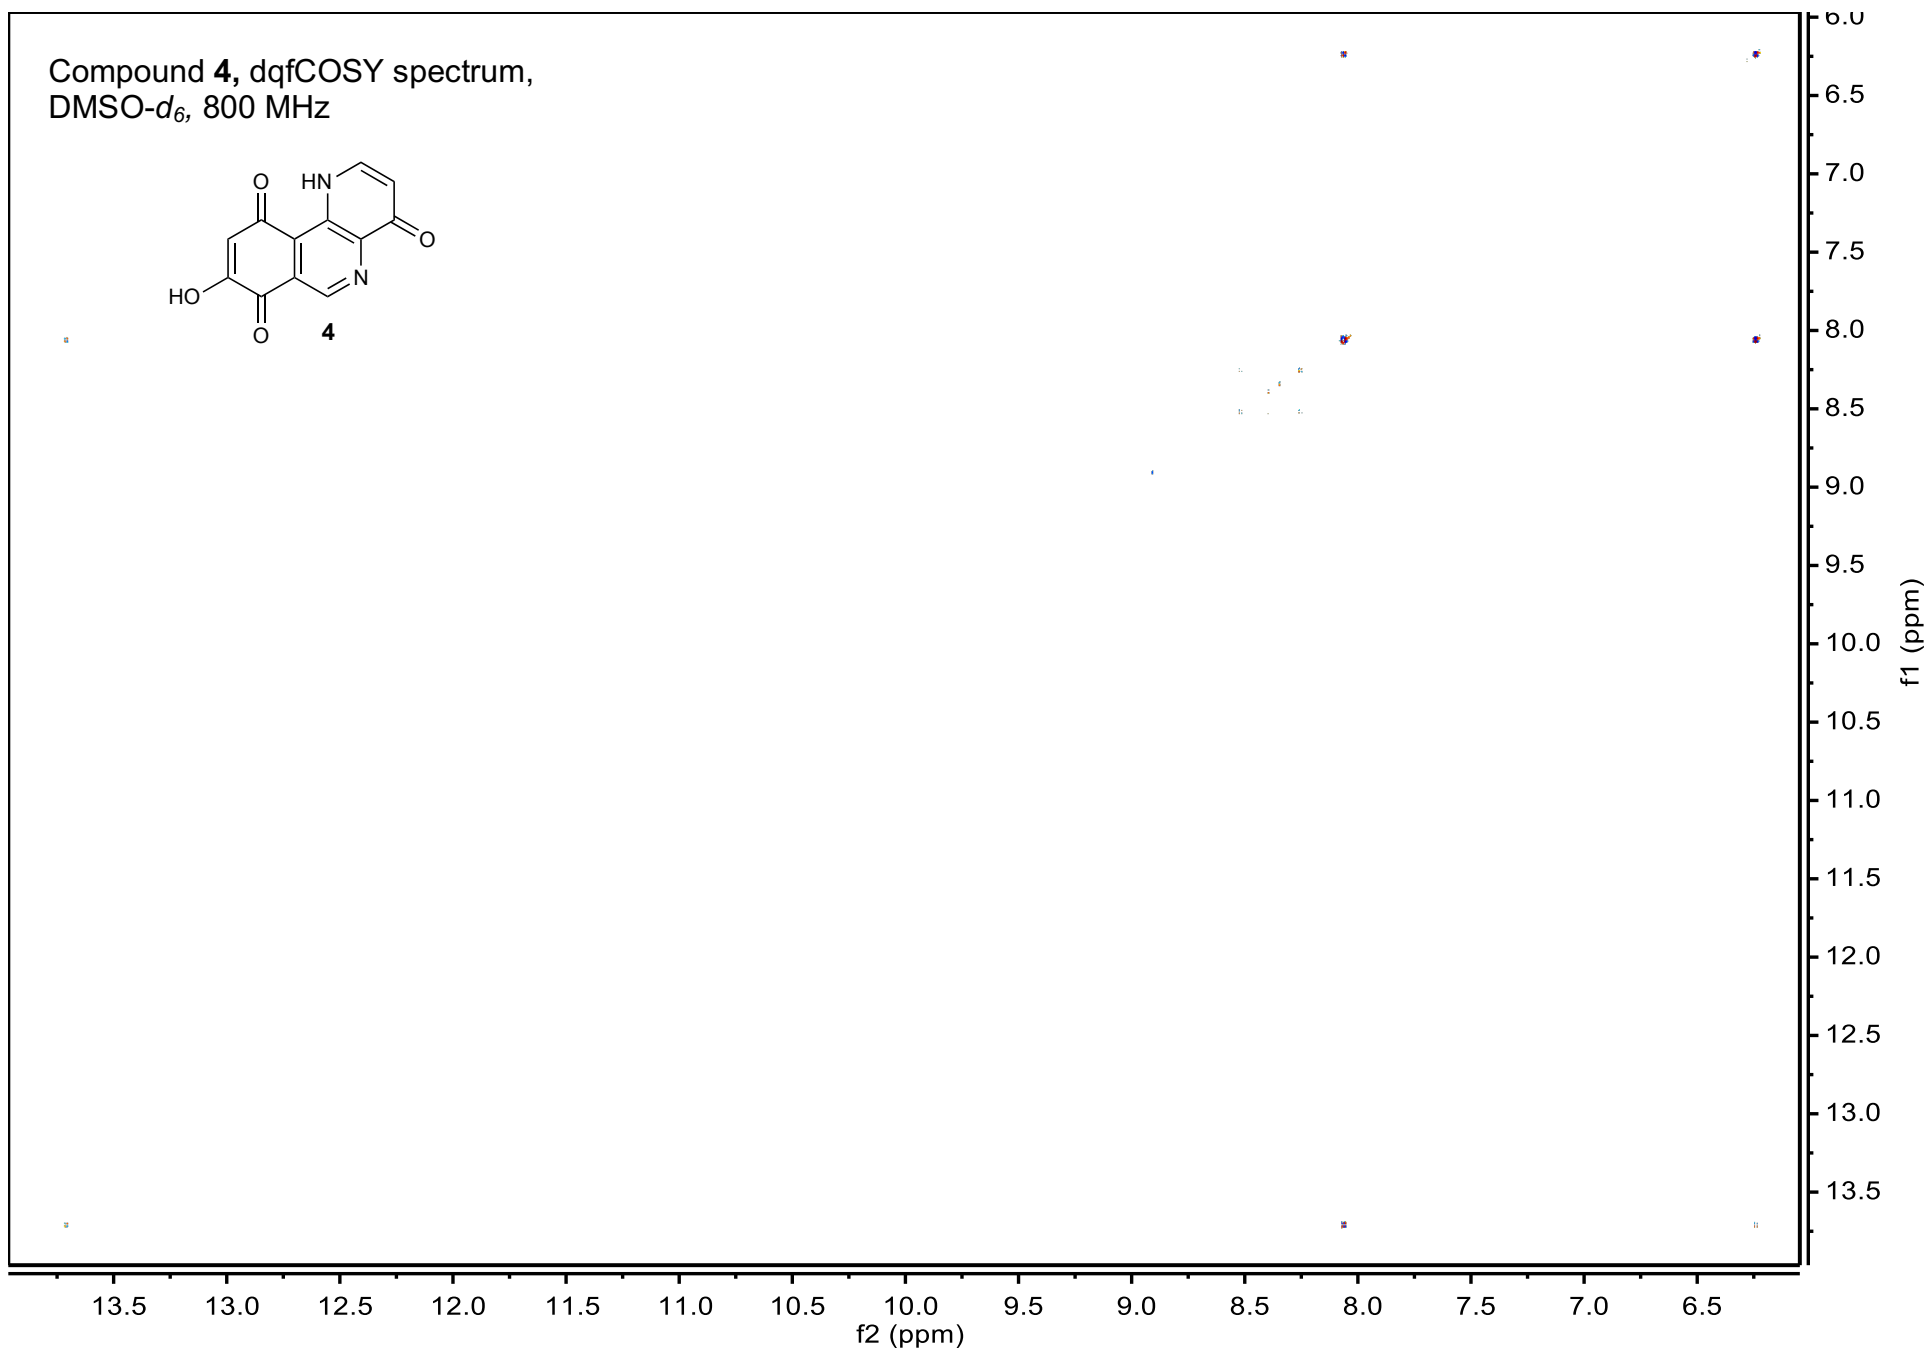

Compound **4**, coupled HSQC spectrum,  
DMSO-*d*<sub>6</sub>, 800 MHz

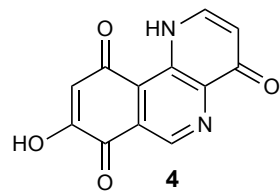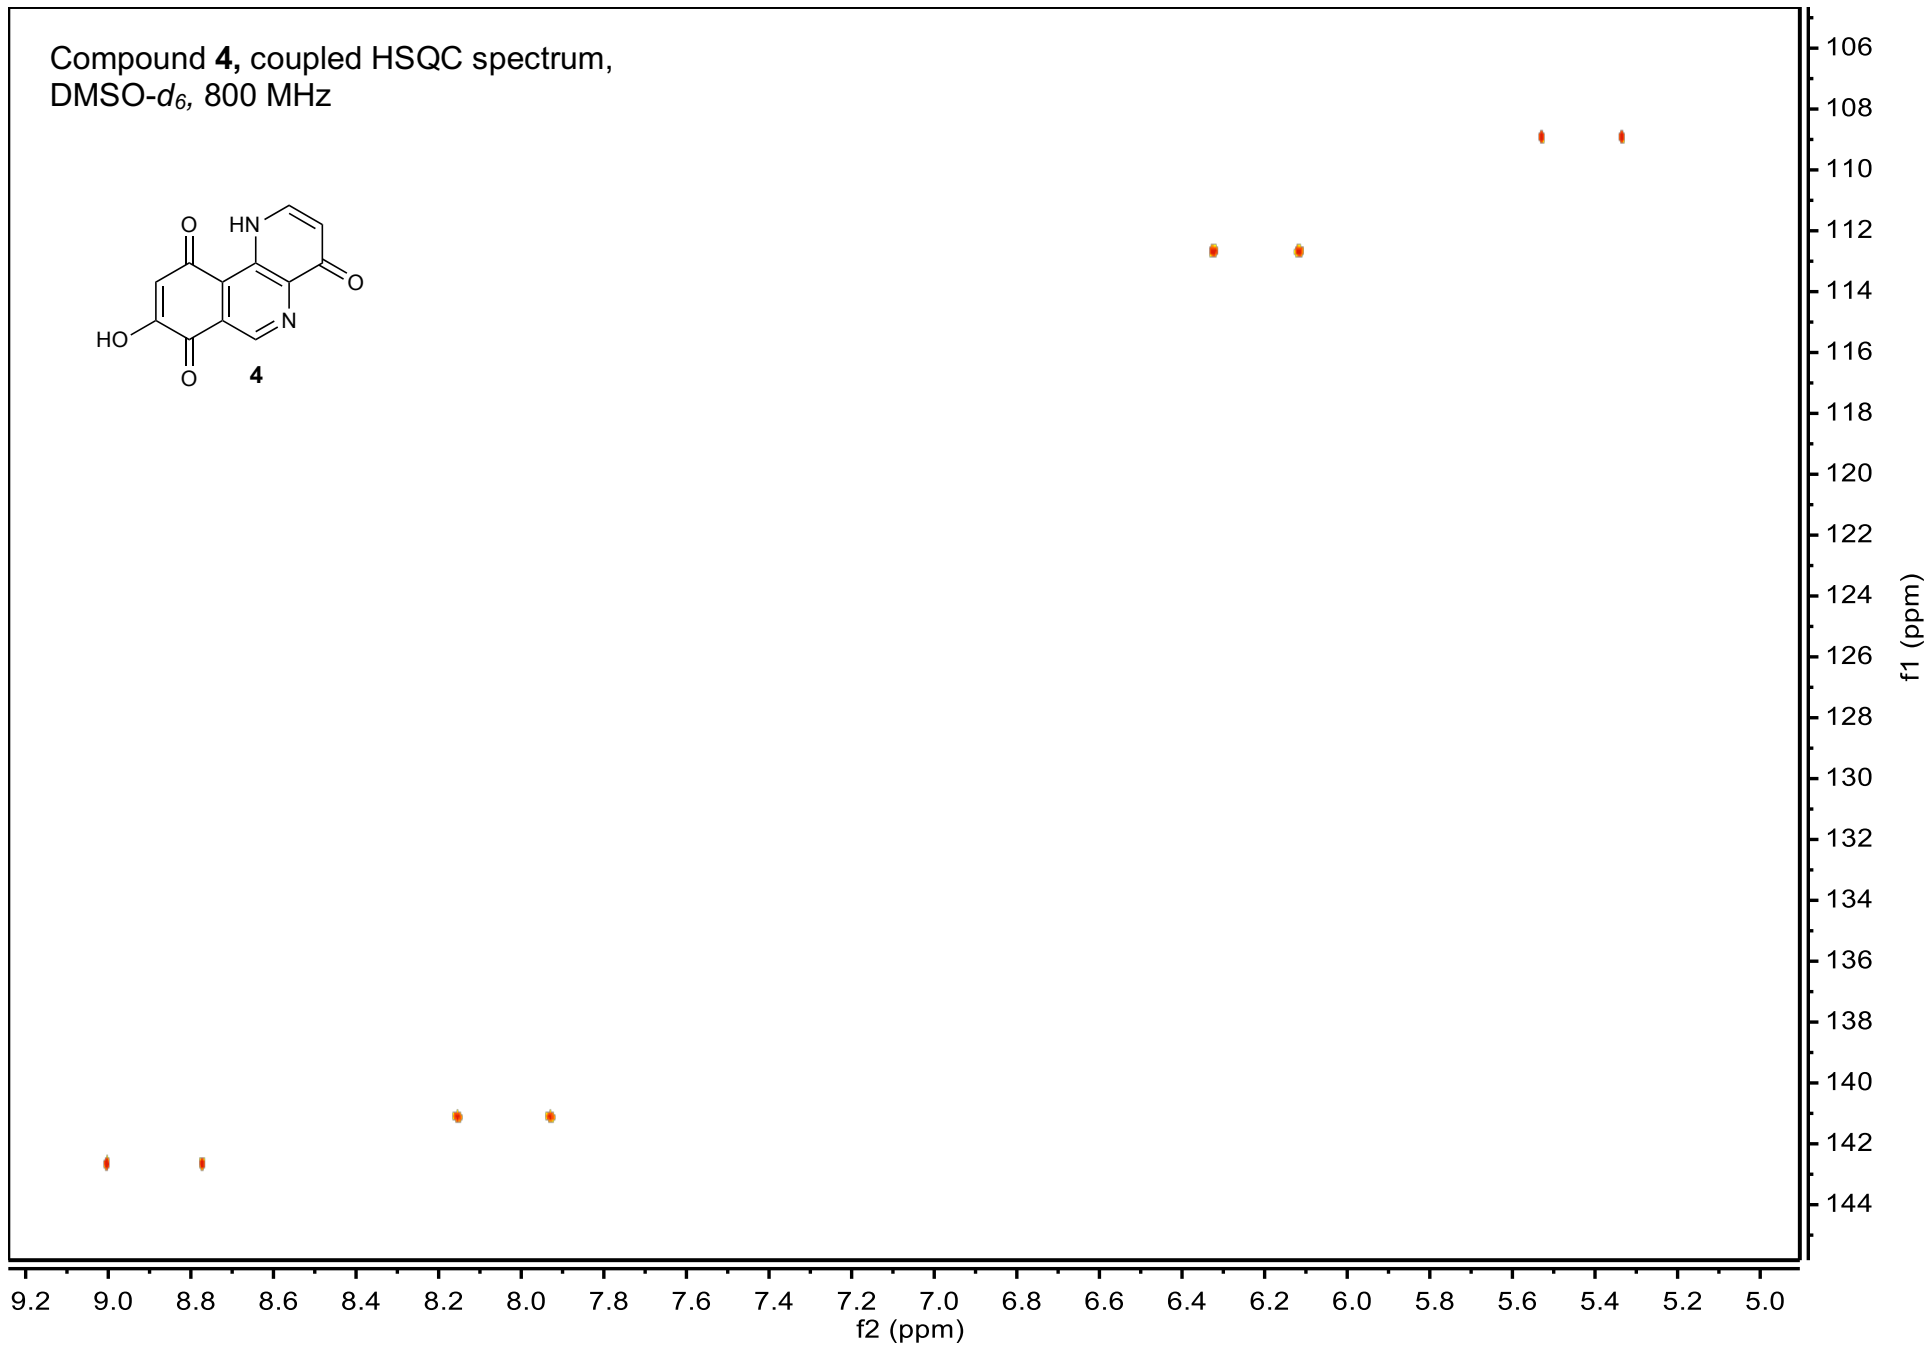

Compound **4**, HMBC spectrum,  
DMSO-*d*<sub>6</sub>, 800 MHz

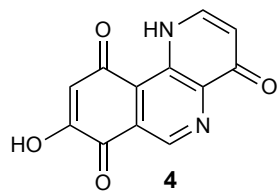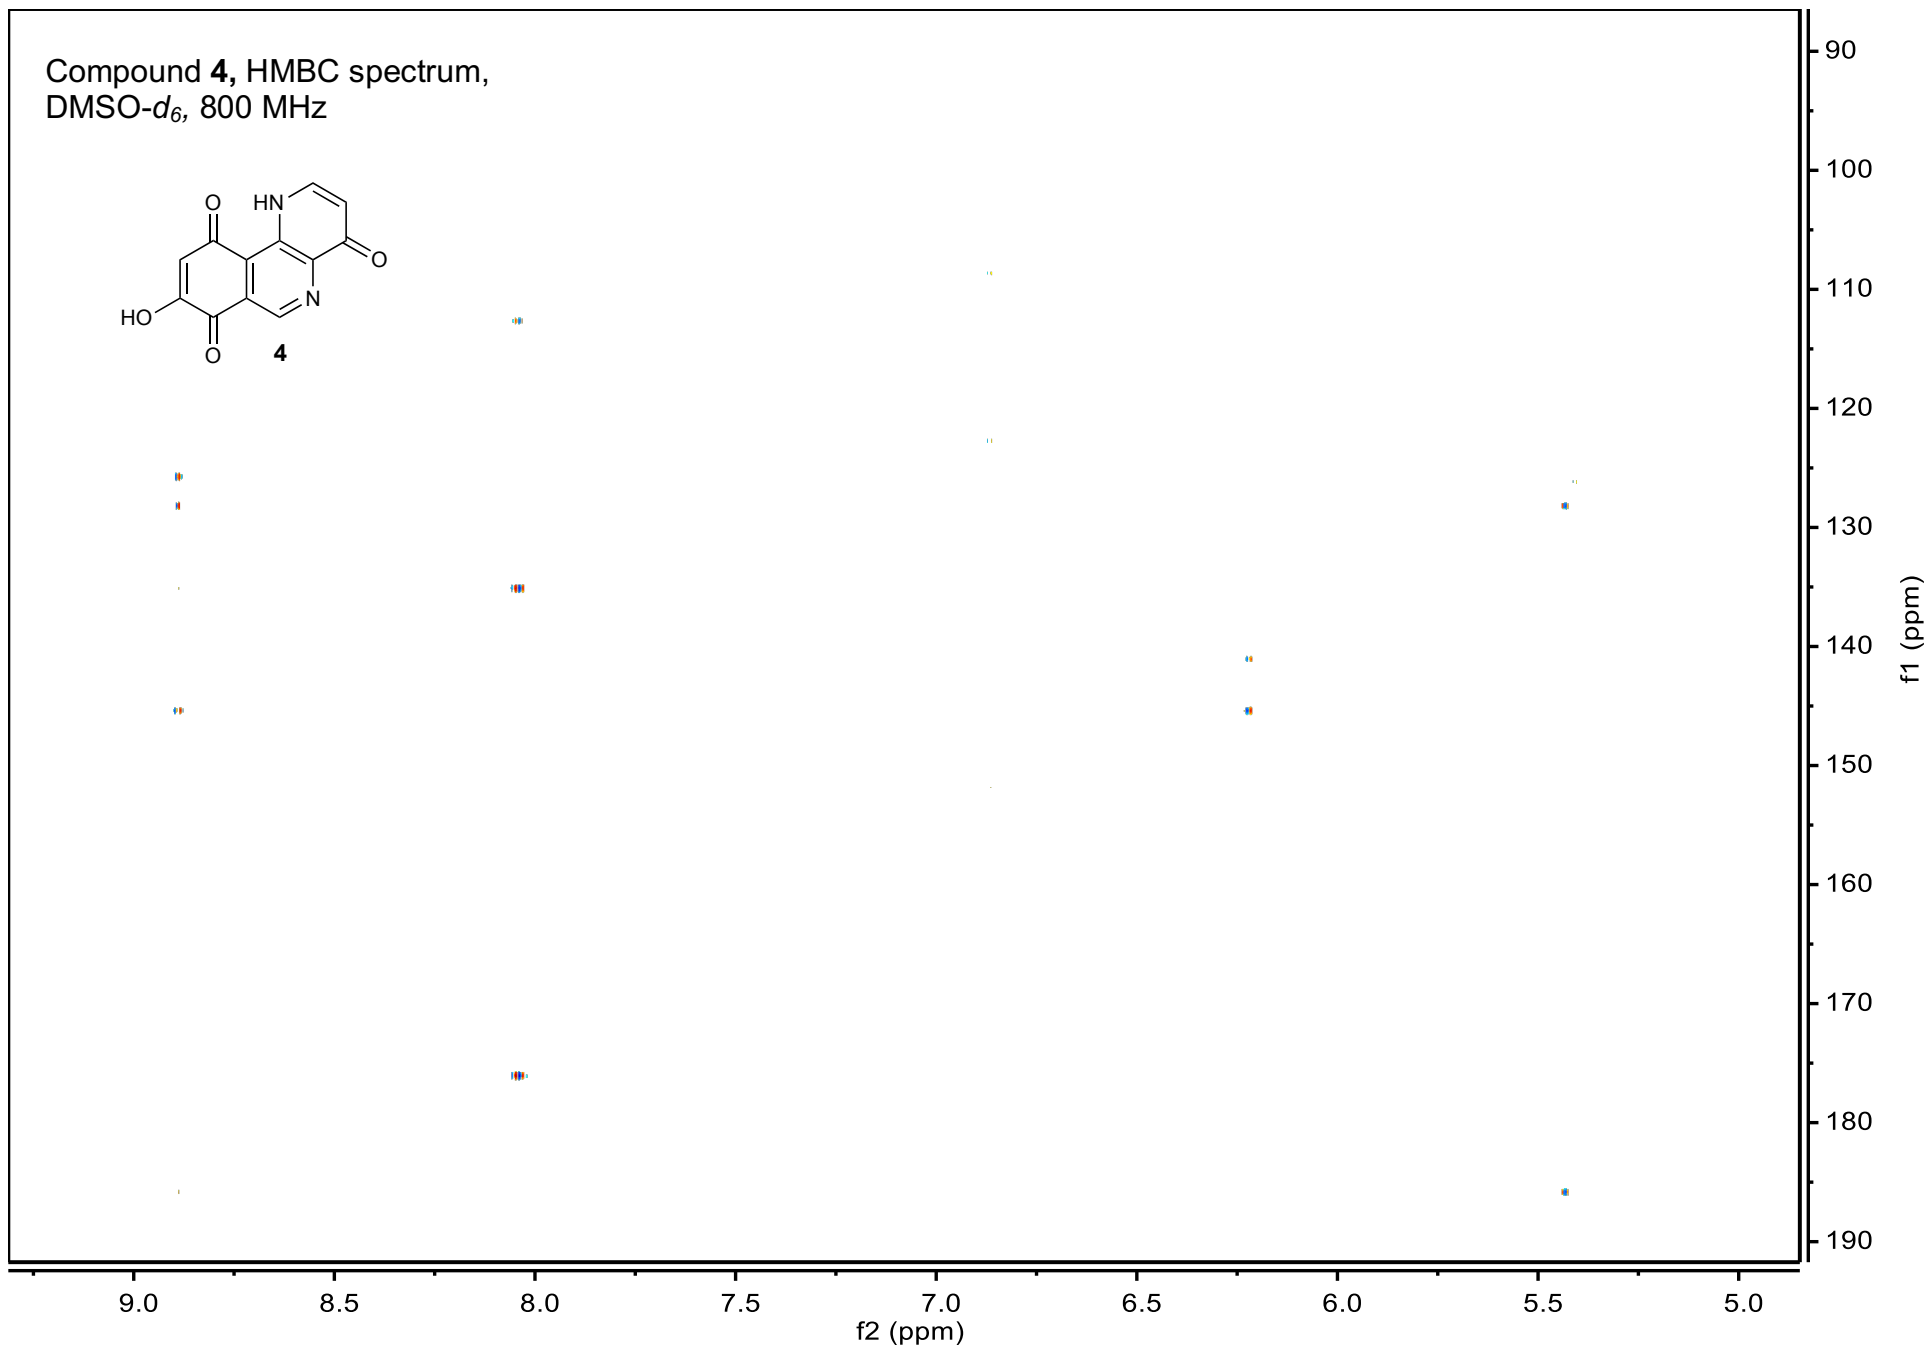

Compound **4**, NOESY spectrum,  
DMSO-*d*<sub>6</sub>, 800 MHz

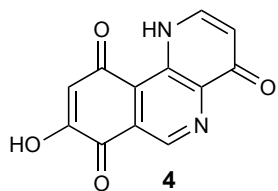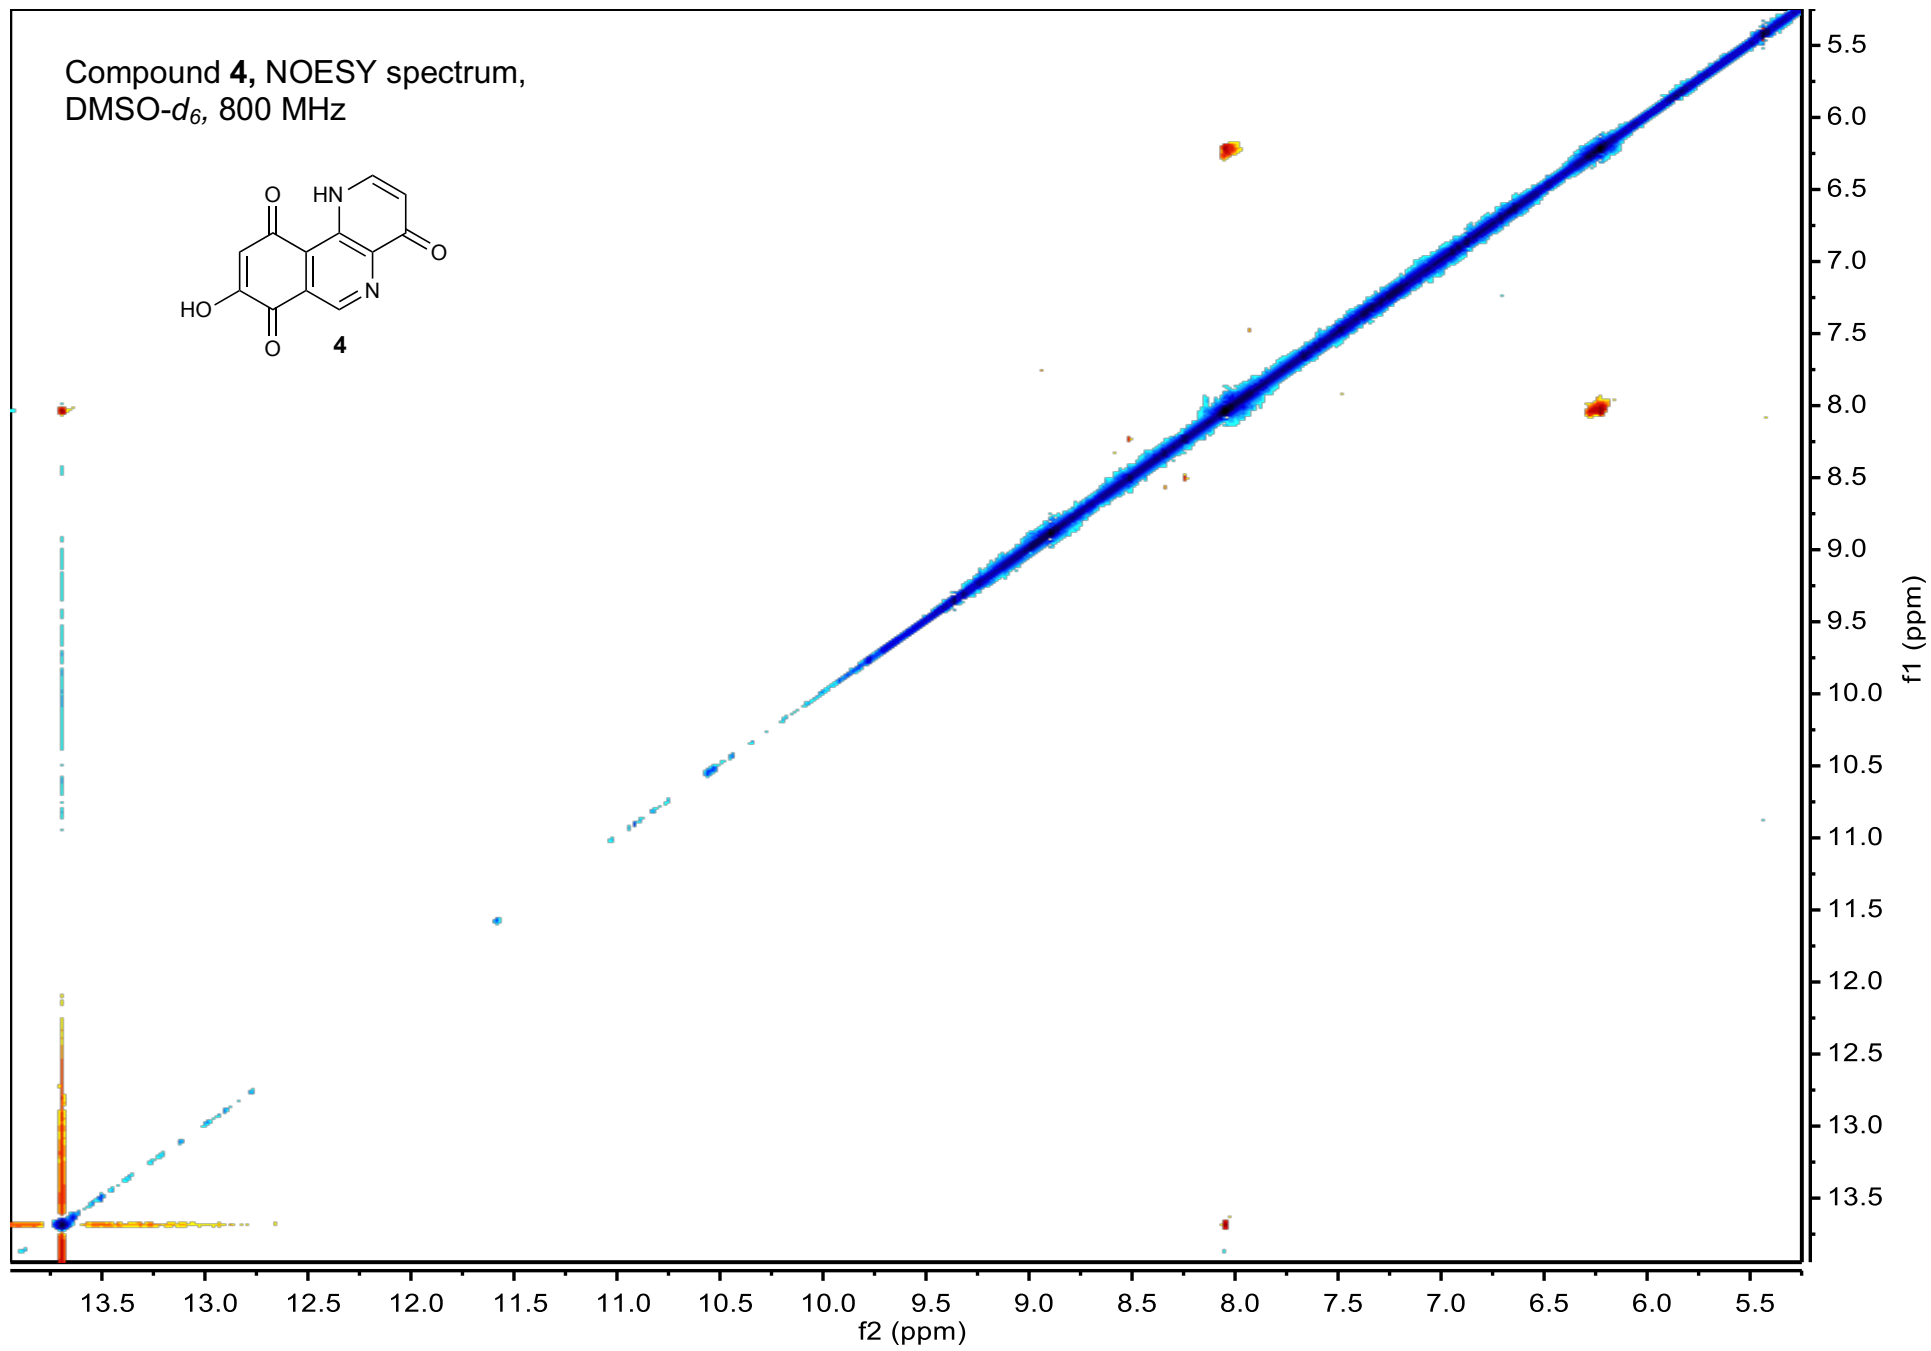

**<sup>1</sup>H (800 MHz) and or <sup>13</sup>C (200 MHz) NMR spectroscopic data for compound 5 in DMSO-*d*<sub>6</sub>.**

Chemical shifts were referenced to  $\delta(\text{CHD}_2\text{SOCD}_3) = 2.50$  and  $\delta(^{13}\text{C}\text{H}_2\text{SOCD}_3) = 39.52$ . <sup>13</sup>C chemical shifts were determined via HMBC and HSQC spectra. <sup>1</sup>H, <sup>1</sup>H-*J*-coupling constants were determined from the acquired <sup>1</sup>H spectrum. NOESY correlations were observed using a mixing time of 600 ms. HMBC correlations are from the proton(s) stated to the indicated <sup>13</sup>C atom.

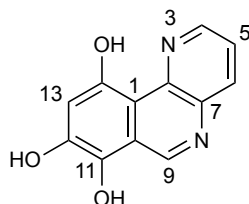

| No. | $\delta_c$ | Proton | $\delta\text{H} (J_{\text{HH}}[\text{Hz}])$ | HMBC <sup>a</sup>     | NOESY    |
|-----|------------|--------|---------------------------------------------|-----------------------|----------|
| 1   | 108.19     |        |                                             |                       |          |
| 2   | 142.74     |        |                                             |                       |          |
| 3   |            |        |                                             |                       |          |
| 4   | 146.12     | 4-H    | 8.87 ( $J_{4,5} = 4.7$ )                    | 2, 5, 6               | 5, 14-OH |
| 5   | 121.77     | 5-H    | 7.75 ( $J_{5,4} = 4.7, J_{5,6} = 8.3$ )     | 4, 7                  | 4, 6     |
| 6   | 136.97     | 6-H    | 8.48 ( $J_{6,5} = 8.3$ )                    | 2, 4                  | 5        |
| 7   | 136.52     |        |                                             |                       |          |
| 8   |            |        |                                             |                       |          |
| 9   | 149.94     | 9-H    | 9.52                                        | 1, 2w, 7, 10, 11, 14w |          |
| 10  | 118.41     |        |                                             |                       |          |
| 11  | 133.63     |        |                                             |                       |          |
| 12  | 146.74     |        |                                             |                       |          |
| 13  | 106.91     | 13-H   | 6.97                                        | 1, 2w, 11, 12, 14     |          |
| 14  | 150.40     |        |                                             |                       |          |
| 14  |            | 14-OH  | 13.42                                       | 1, 12, 13, 14         | 4        |

<sup>a</sup>w: weak correlation (less than ~10% of the intensity of strongest signal)



Compound **5**,  $^1\text{H}$  NMR spectrum,  
DMSO- $d_6$ , 800 MHz

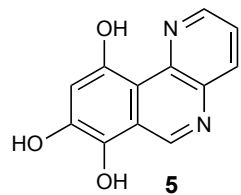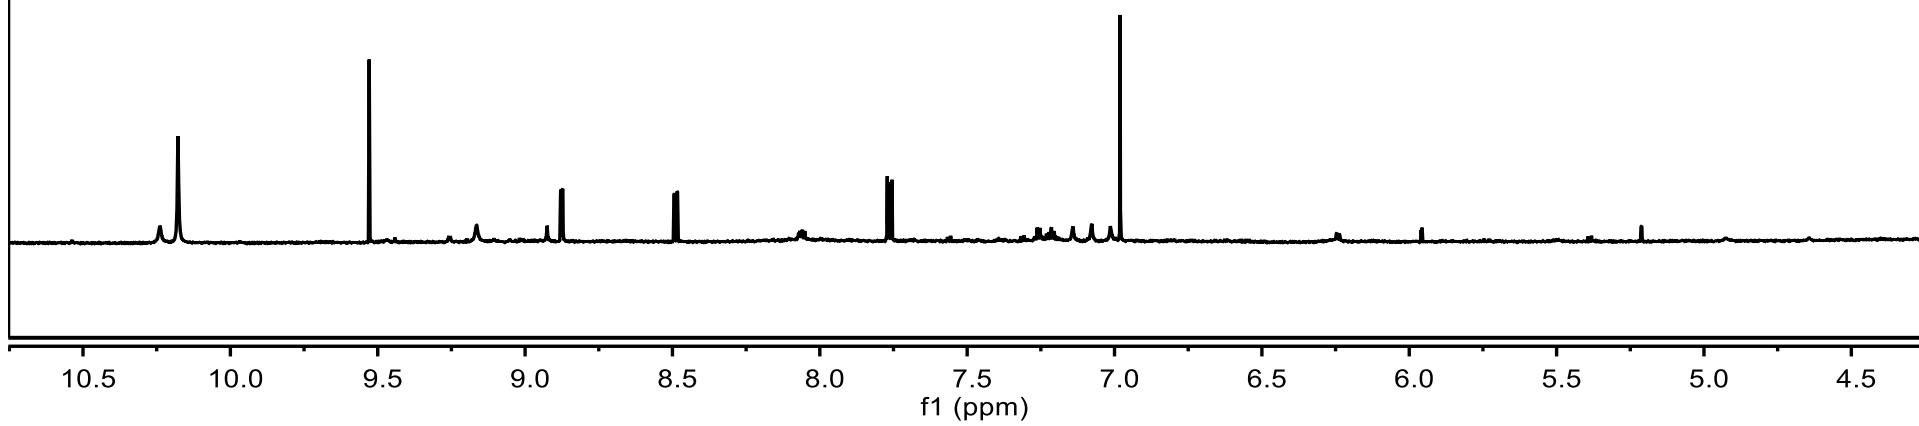

Compound **5**, dqfCOSY spectrum,  
DMSO-*d*<sub>6</sub>, 800 MHz

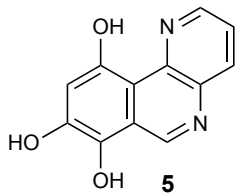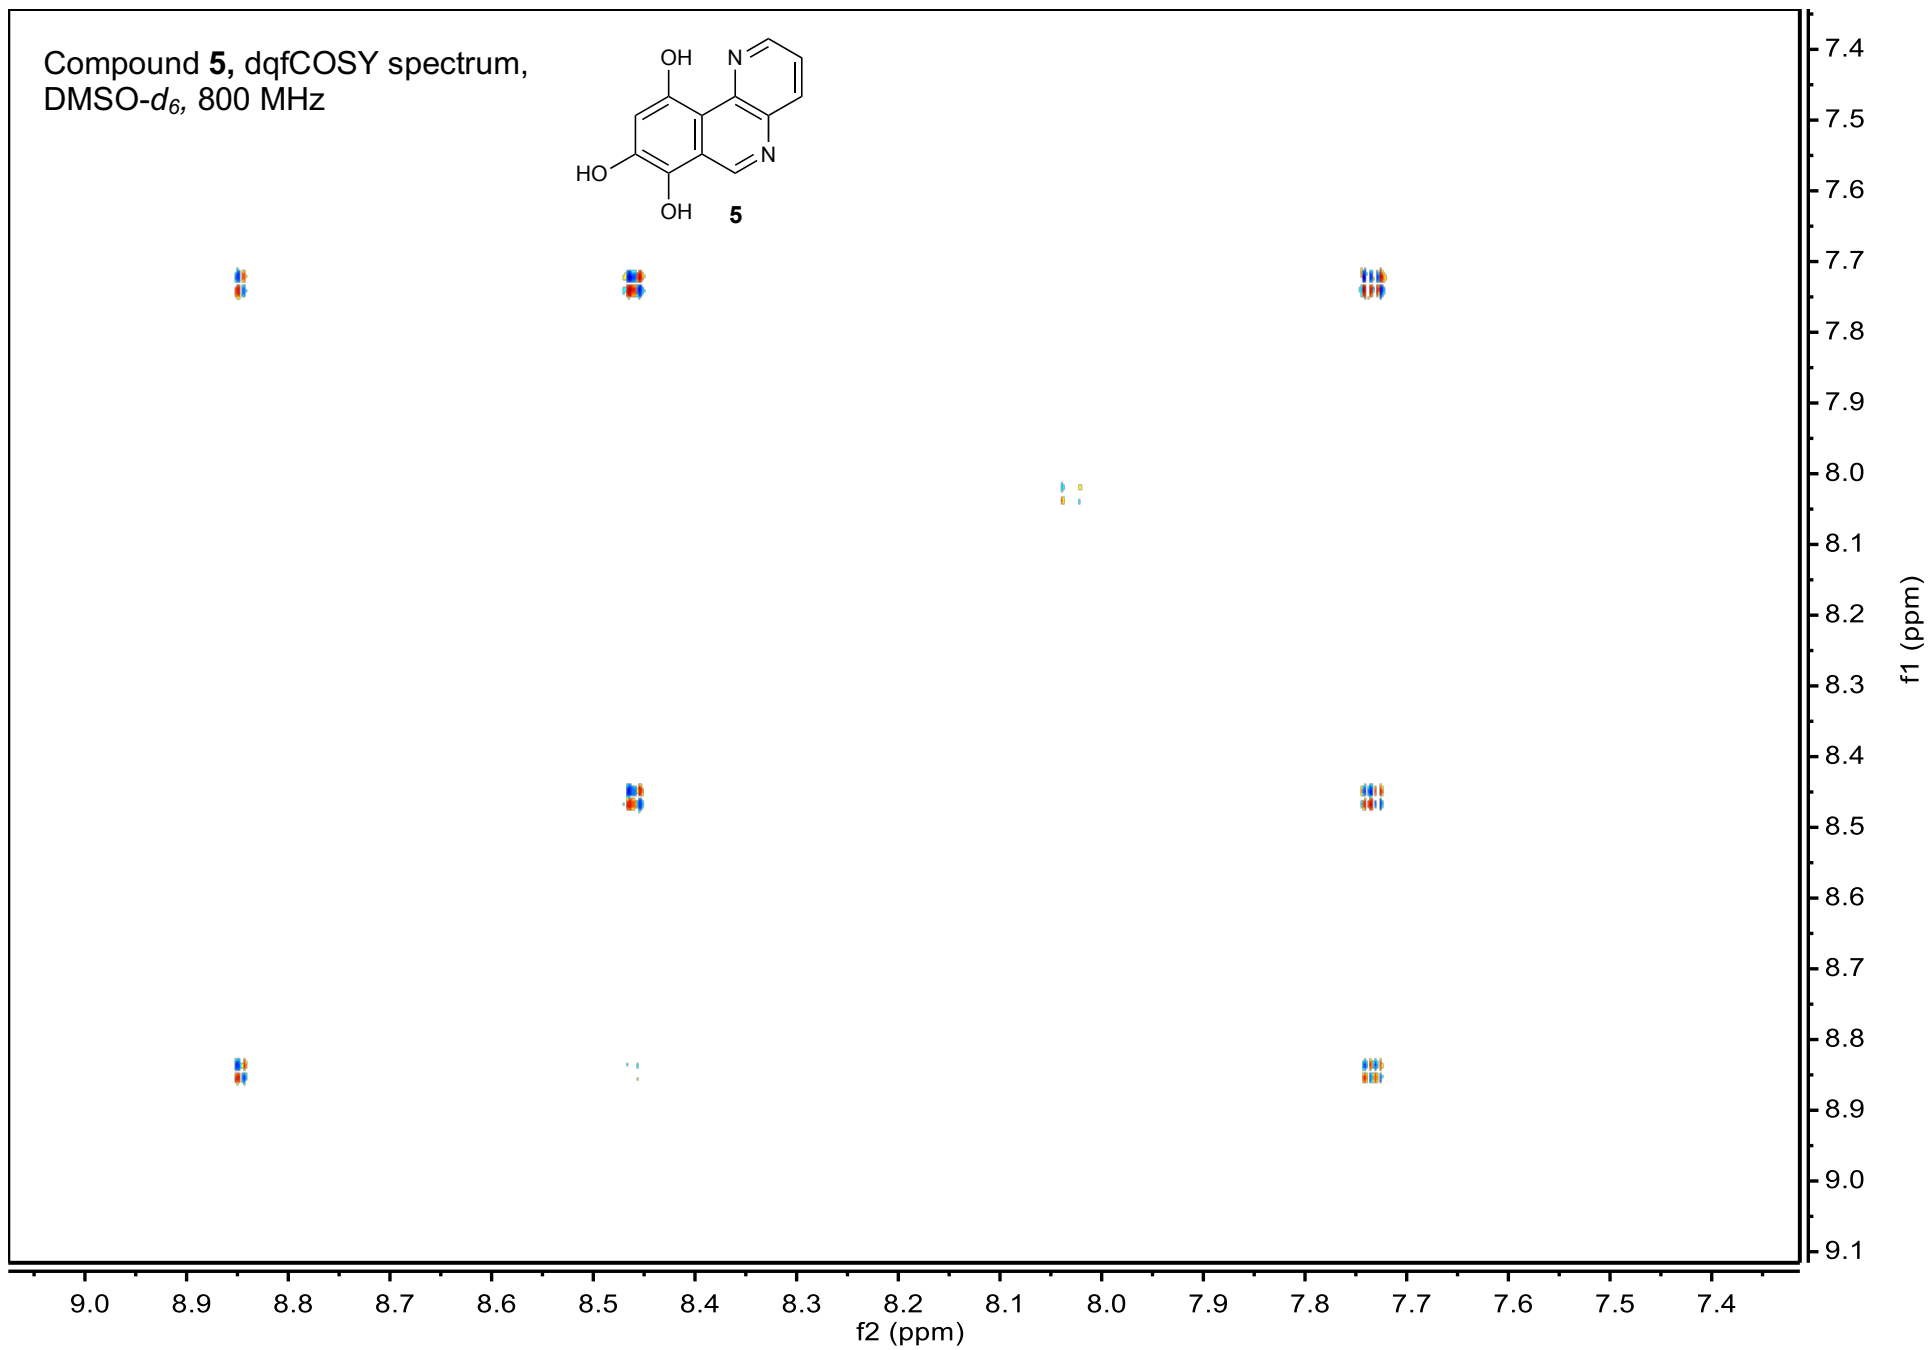

Compound **5**, coupled HSQC spectrum,  
DMSO-*d*<sub>6</sub>, 800 MHz

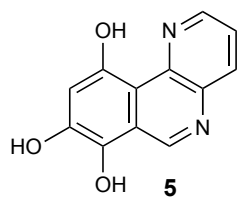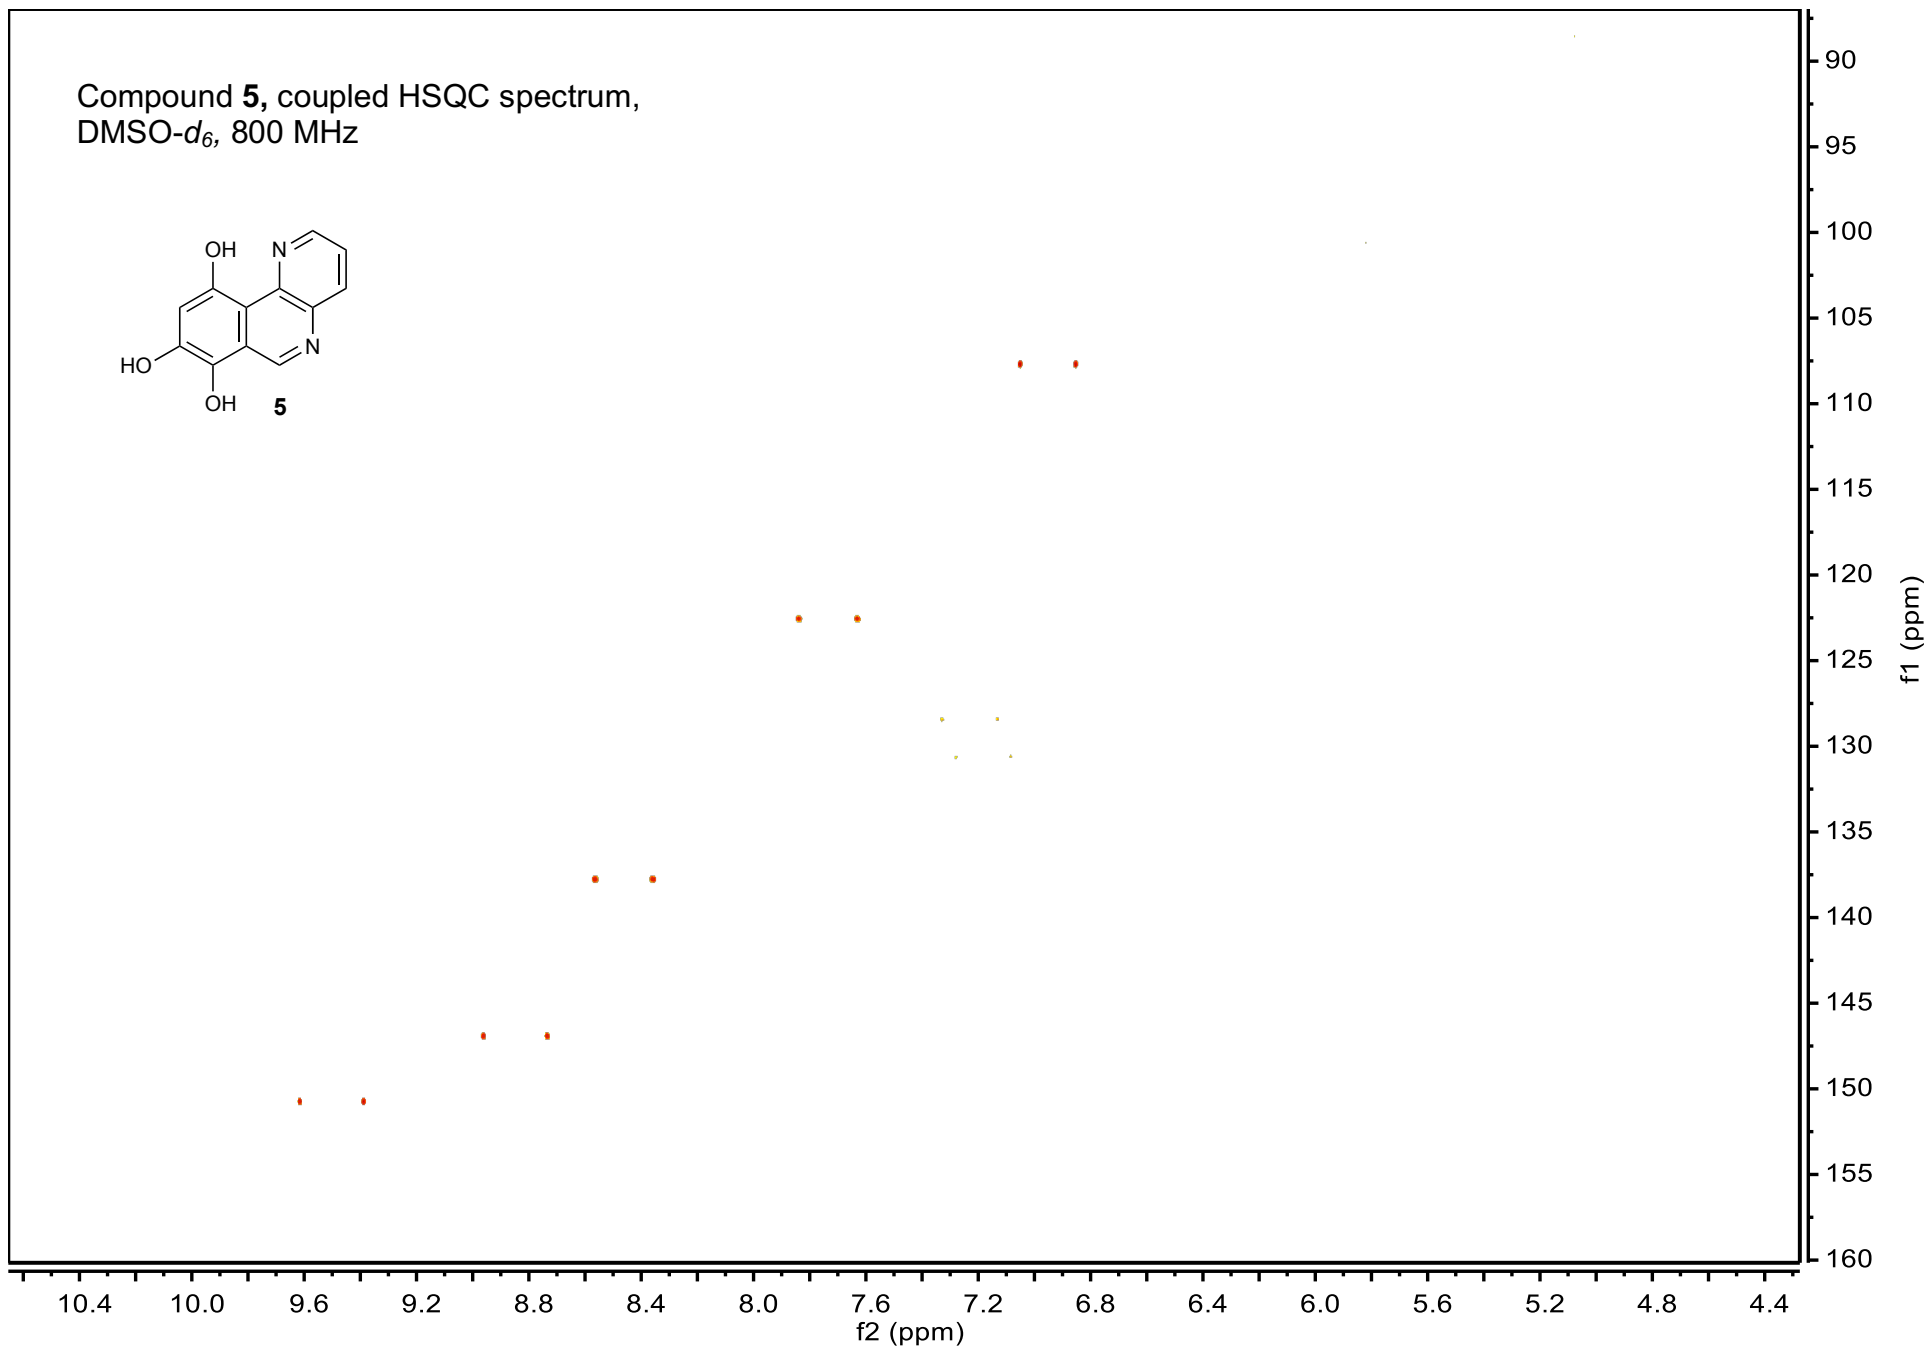

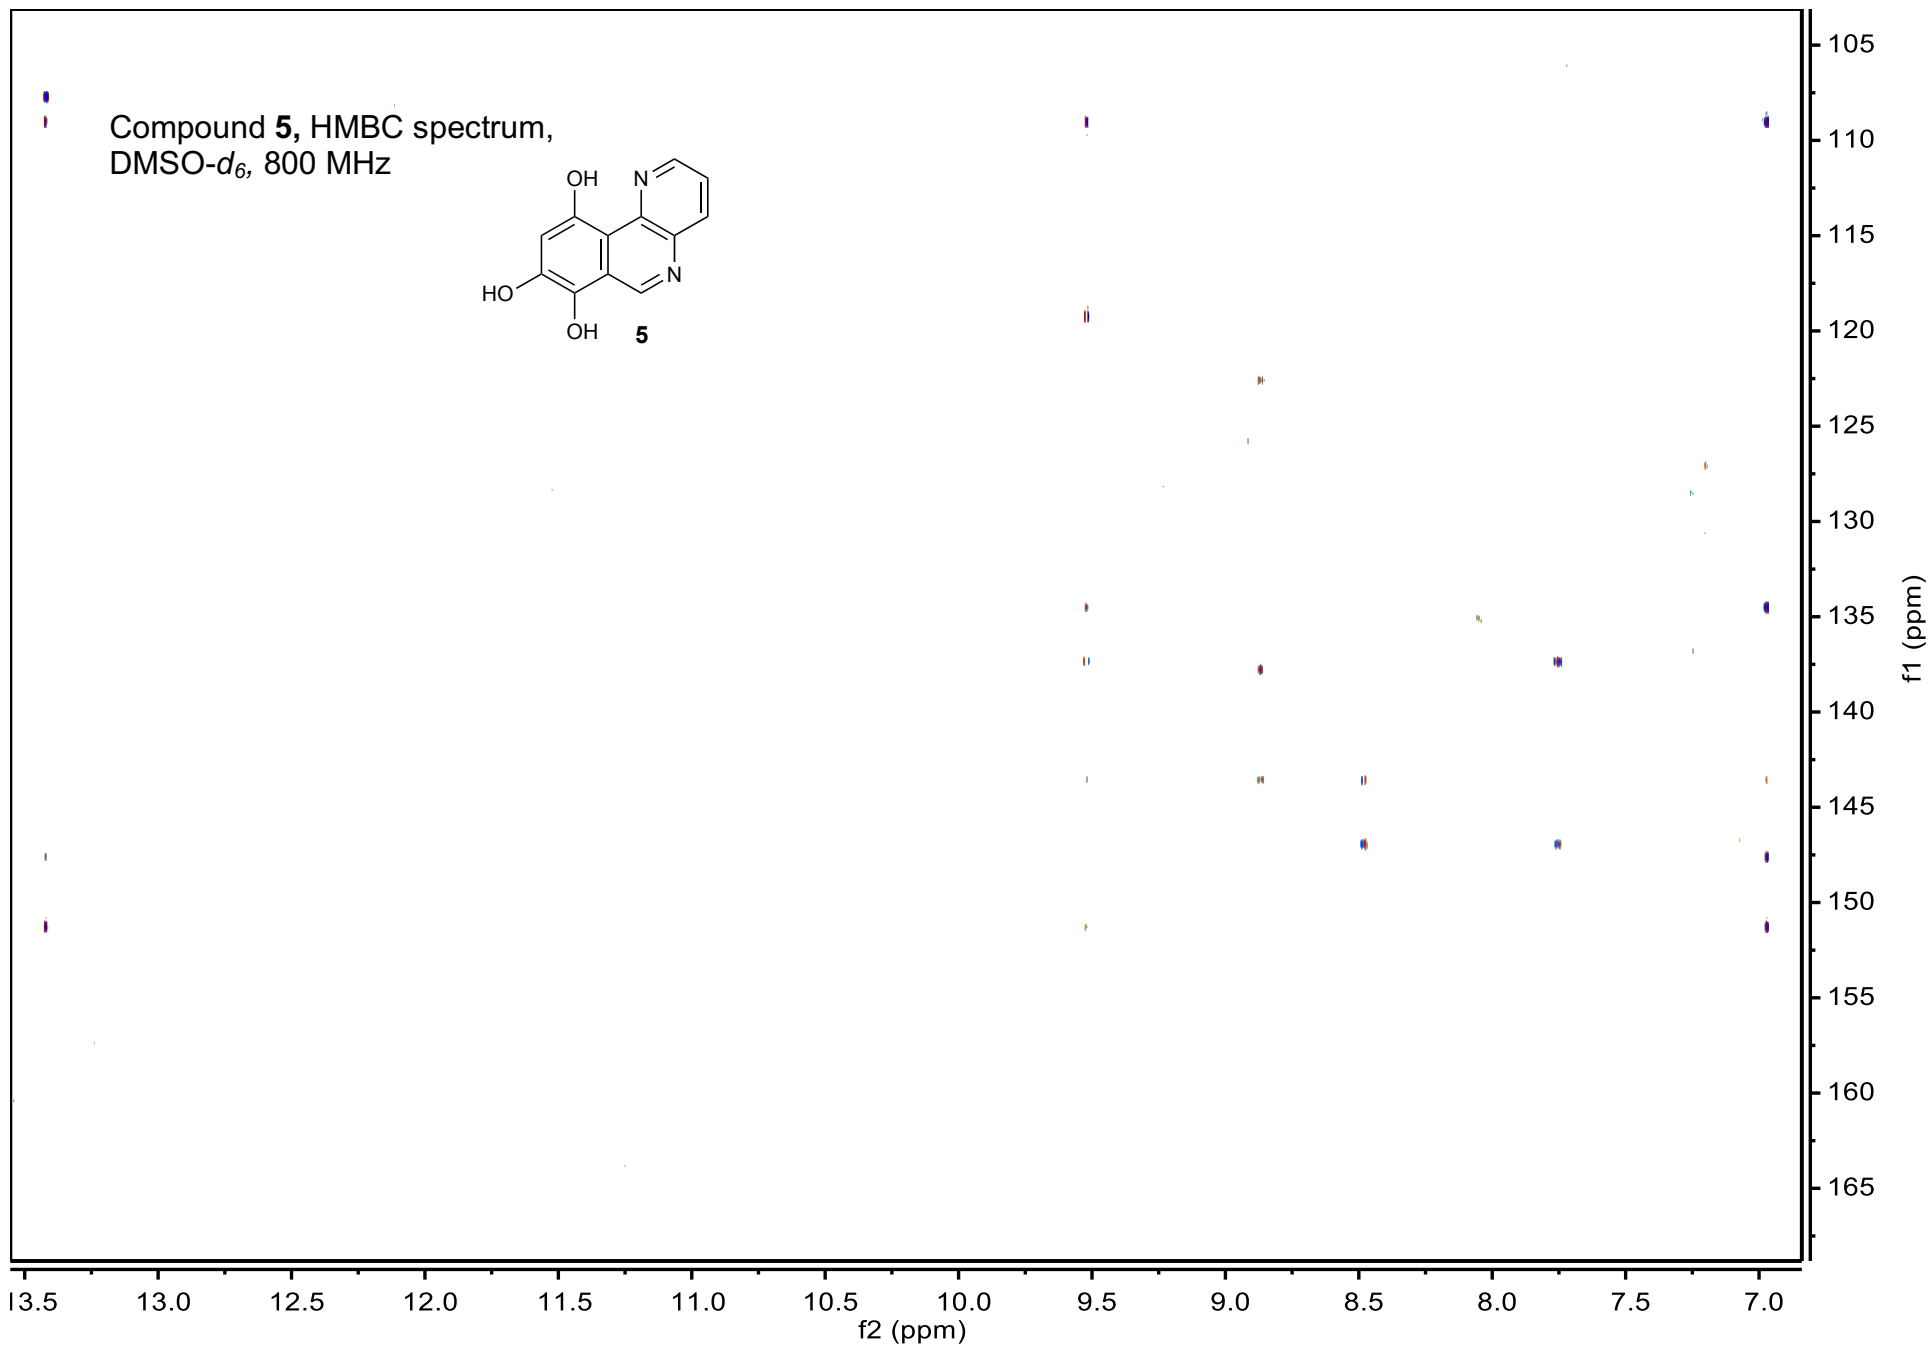

Compound **5**, NOESY spectrum  
(for confirming exchangeable protons),  
DMSO-*d*<sub>6</sub>, 800 MHz

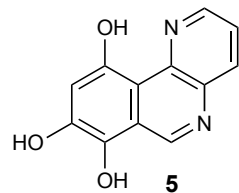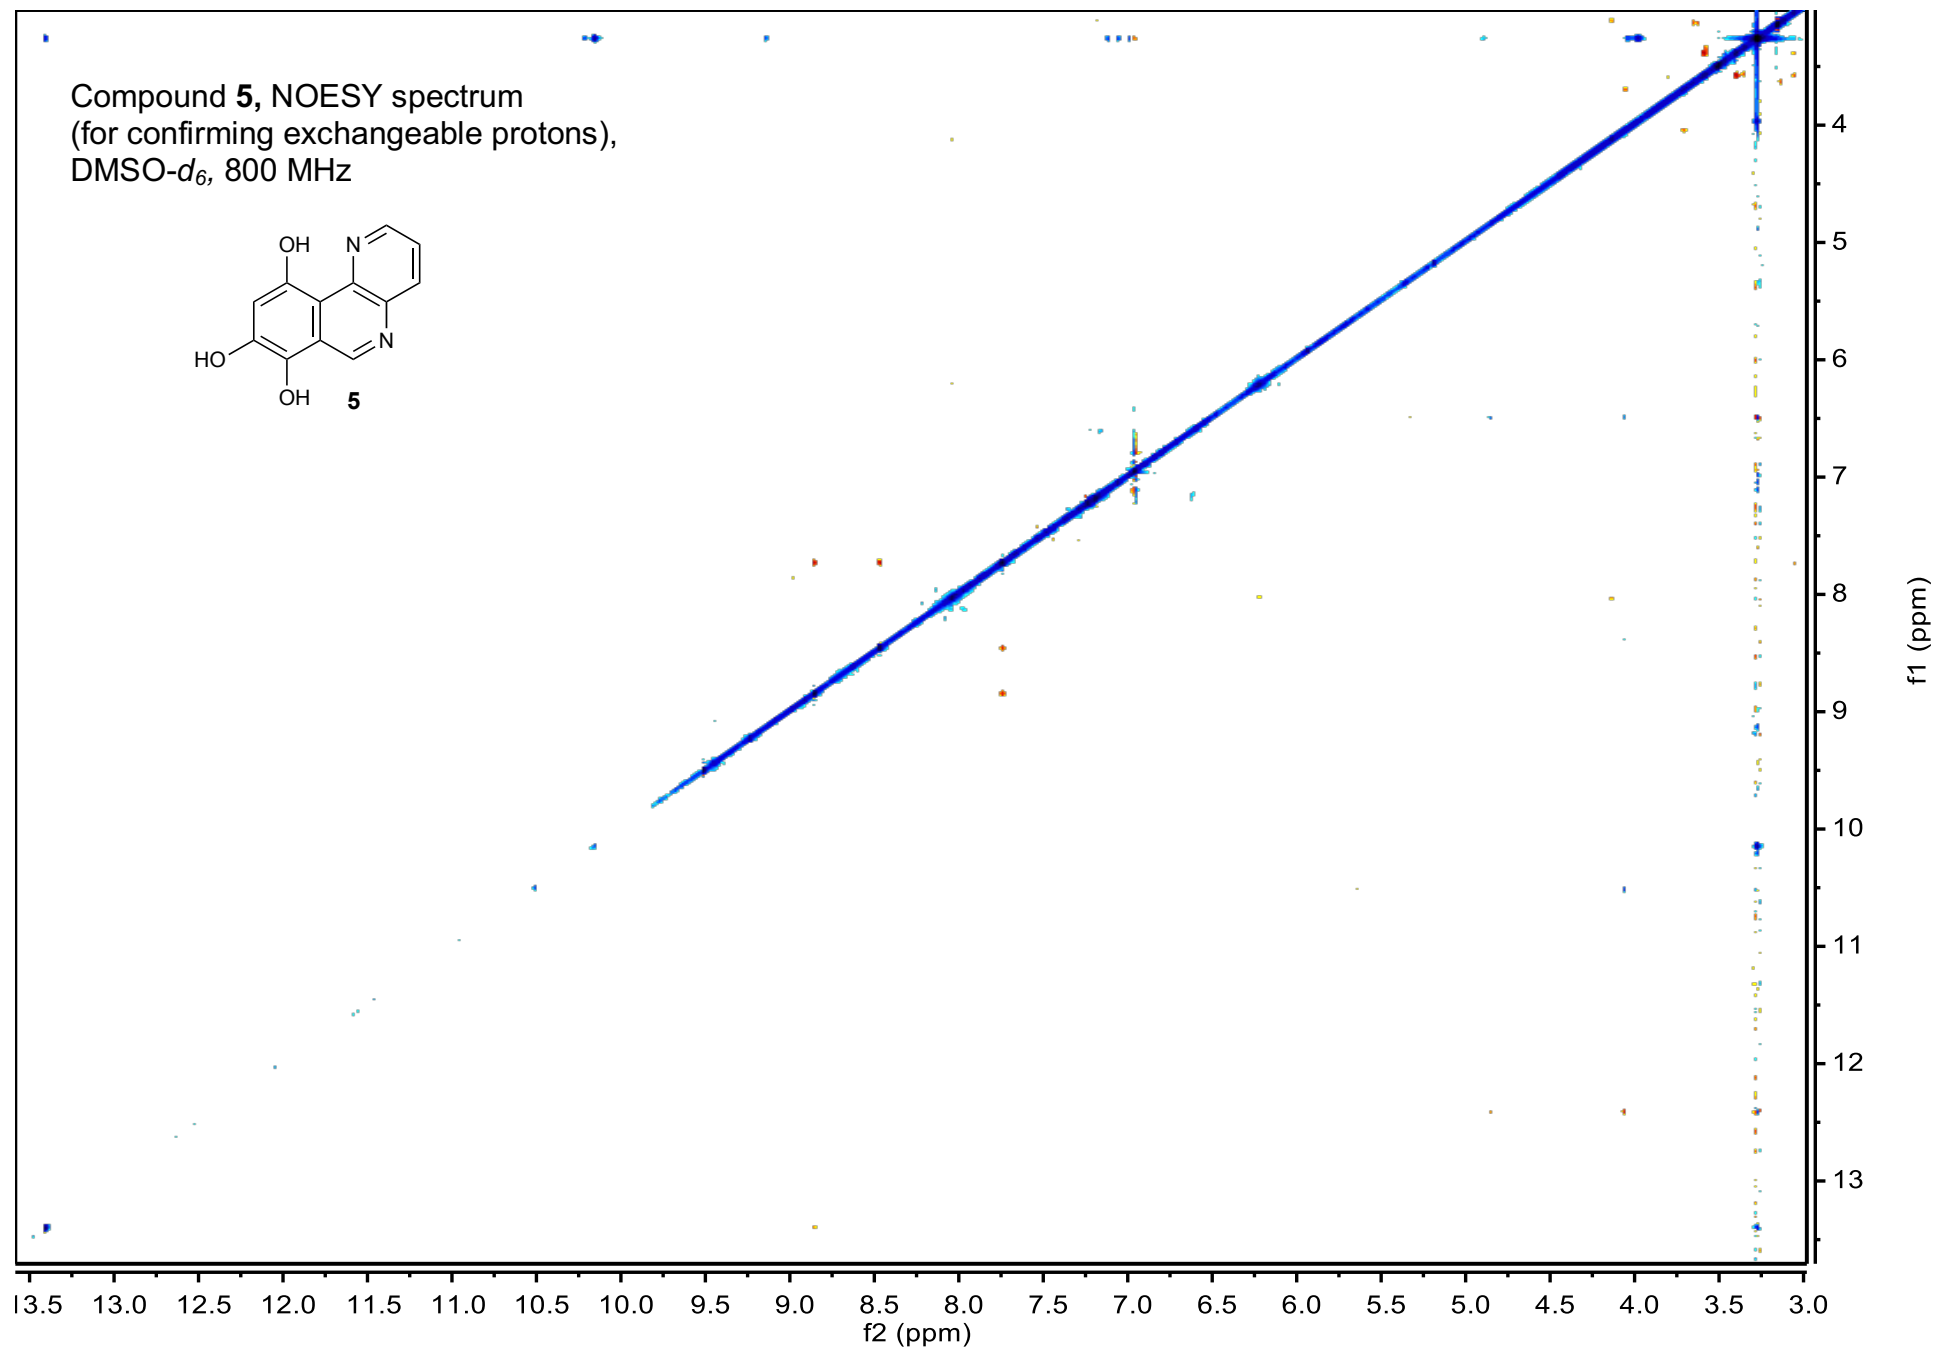

**$^1\text{H}$  (600 MHz) and  $^{13}\text{C}$  (151 MHz) NMR spectroscopic data for compound 8 in methanol- $d_4$ .**

Chemical shifts were referenced to  $\delta(\text{CHD}_2\text{OD}) = 3.31$  and  $\delta(^{13}\text{C}\text{HD}_2\text{OD}) = 49.0$ .  $^{13}\text{C}$  chemical shifts were determined via an HMBC spectrum.  $^1\text{H}$ ,  $^1\text{H}$ - $J$ -coupling constants were determined from the acquired  $^1\text{H}$  spectrum. HMBC correlations are from the proton(s) stated to the indicated  $^{13}\text{C}$  atom.

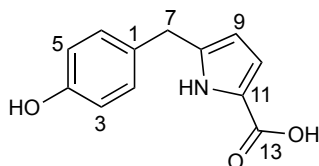

| No. | $\delta_c$ | Proton          | $\delta\text{H}$ ( $J_{\text{HH}}$ [Hz]) | HMBC             |
|-----|------------|-----------------|------------------------------------------|------------------|
| 1   |            |                 |                                          |                  |
| 2   | 129.62     | 2-H             | 7.03 ( $J_{2,3} = 8.5$ )                 | 1, 3, 4, 7       |
| 3   | 130.63     | 3-H             | 6.70 ( $J_{3,2} = 8.5$ )                 | 1, 4, 5          |
| 4   | 155.91     |                 |                                          |                  |
| 5   | 130.63     | 5-H             | 6.70 ( $J_{5,6} = 8.5$ )                 | 1, 4, 5          |
| 6   | 129.62     | 6-H             | 7.03 ( $J_{6,5} = 8.5$ )                 | 1, 3, 4, 7       |
| 7   | 33.04      | 7- $\text{H}_2$ | 3.83                                     | 2, 3, 5, 6, 8, 9 |
| 8   | 138.30     |                 |                                          |                  |
| 9   | 108.30     | 9-H             | 5.80 ( $J_{9,10} = 3.5$ )                | 7, 8, 10, 11, 13 |
| 10  | 116.12     | 10-H            | 6.62 ( $J_{10,9} = 3.5$ )                | 8, 9, 11, 13     |
| 11  | 122.63     |                 |                                          |                  |
| 12  |            | 12-NH           |                                          |                  |
| 13  | 164.53     |                 |                                          |                  |

Metabolome fraction containing **8** as major component,  
<sup>1</sup>H NMR spectrum in methanol-*d*<sub>4</sub>, 600 MHz

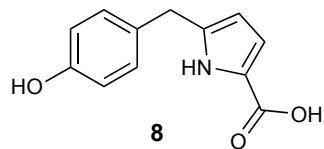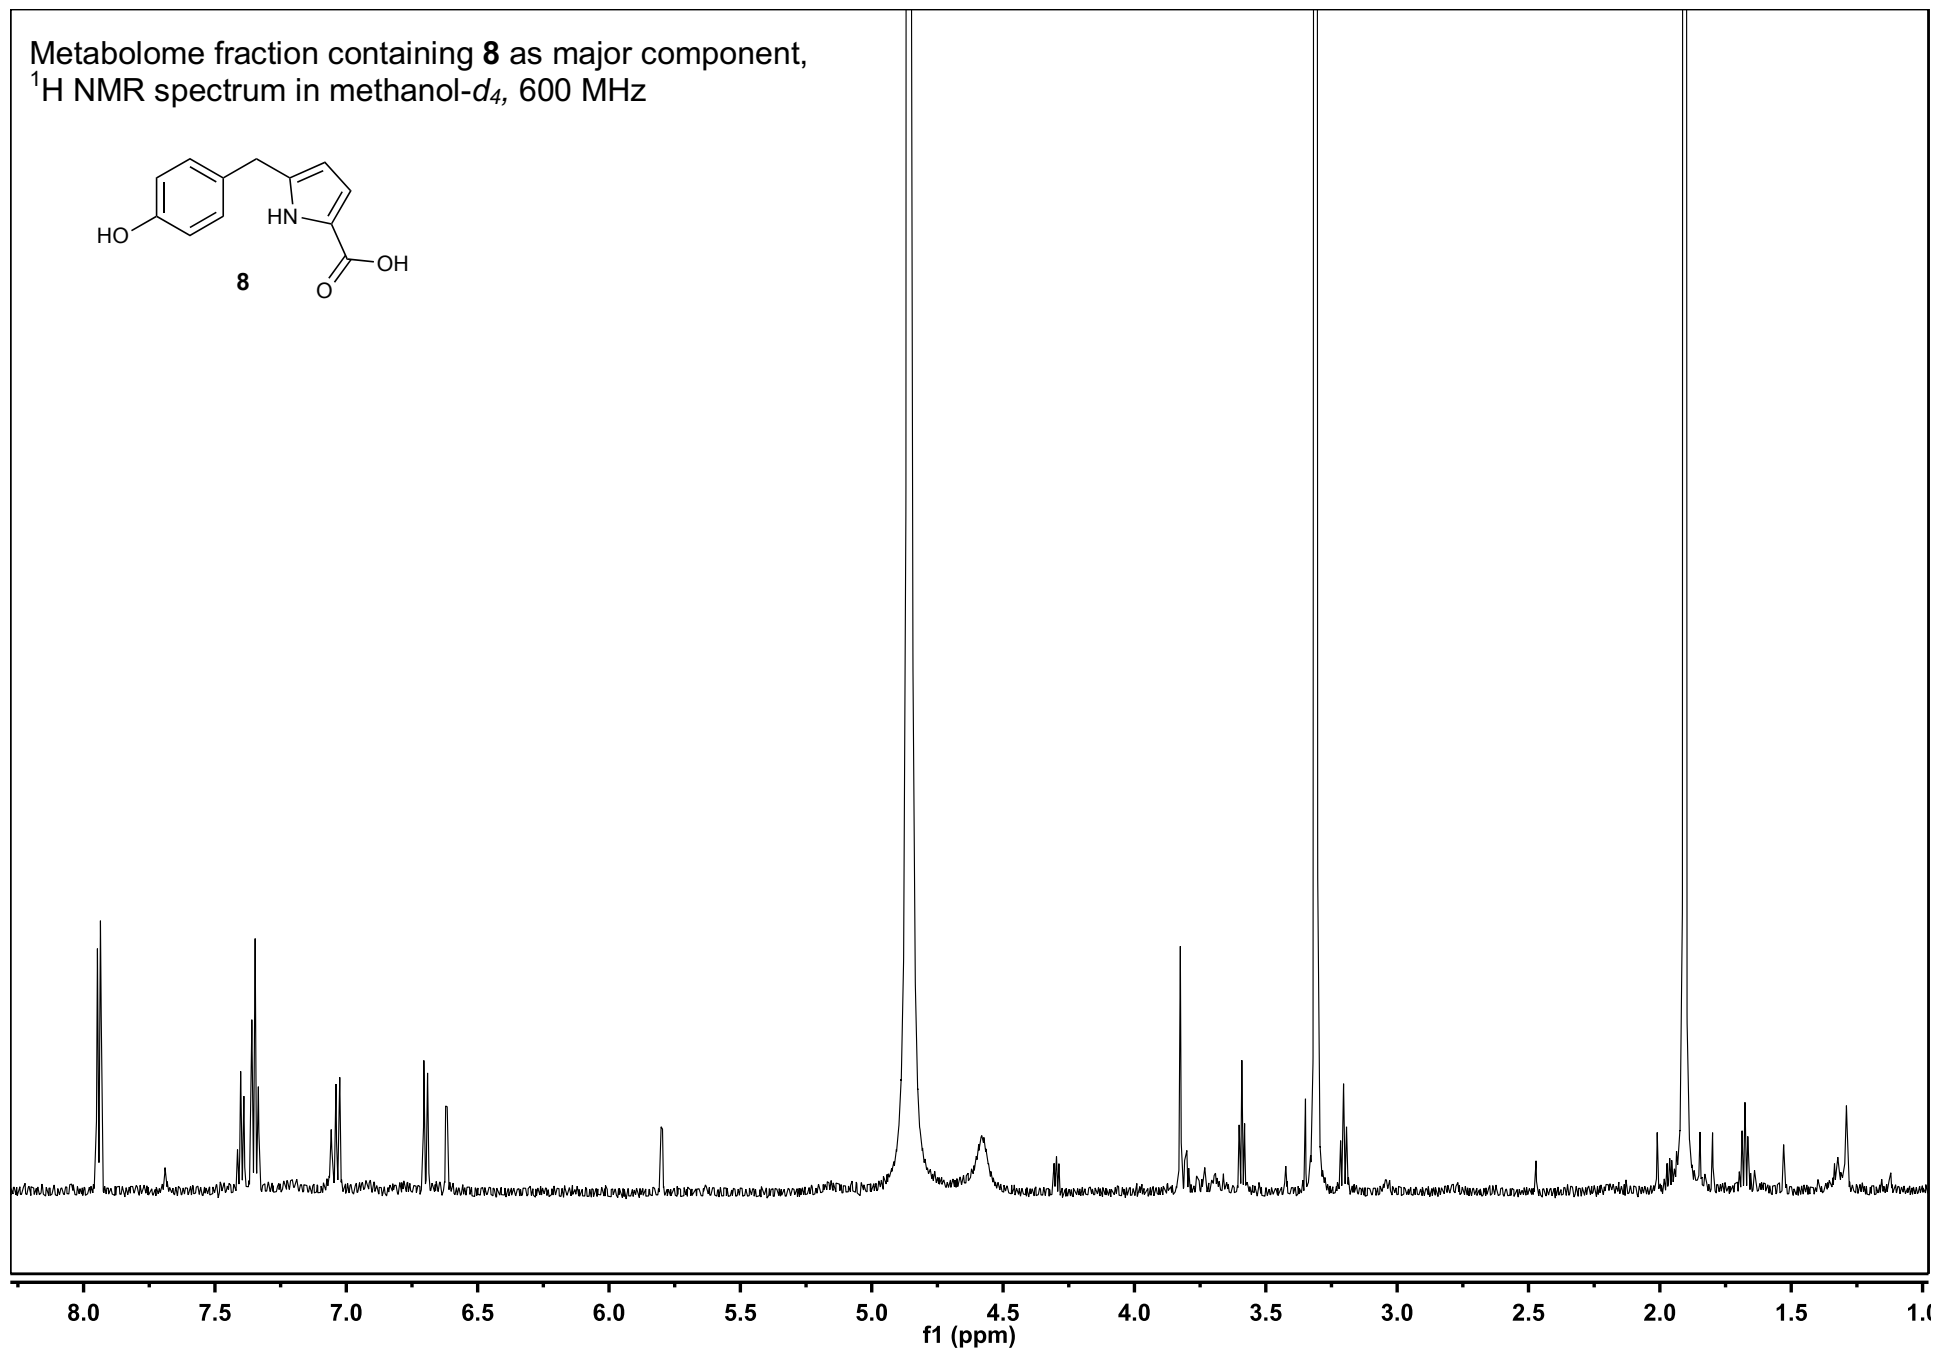

Metabolome fraction containing **8** as major component,  
HMBC spectrum in methanol-*d*<sub>4</sub>, 600 MHz

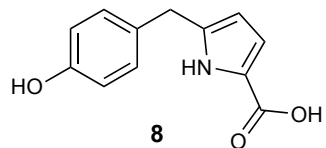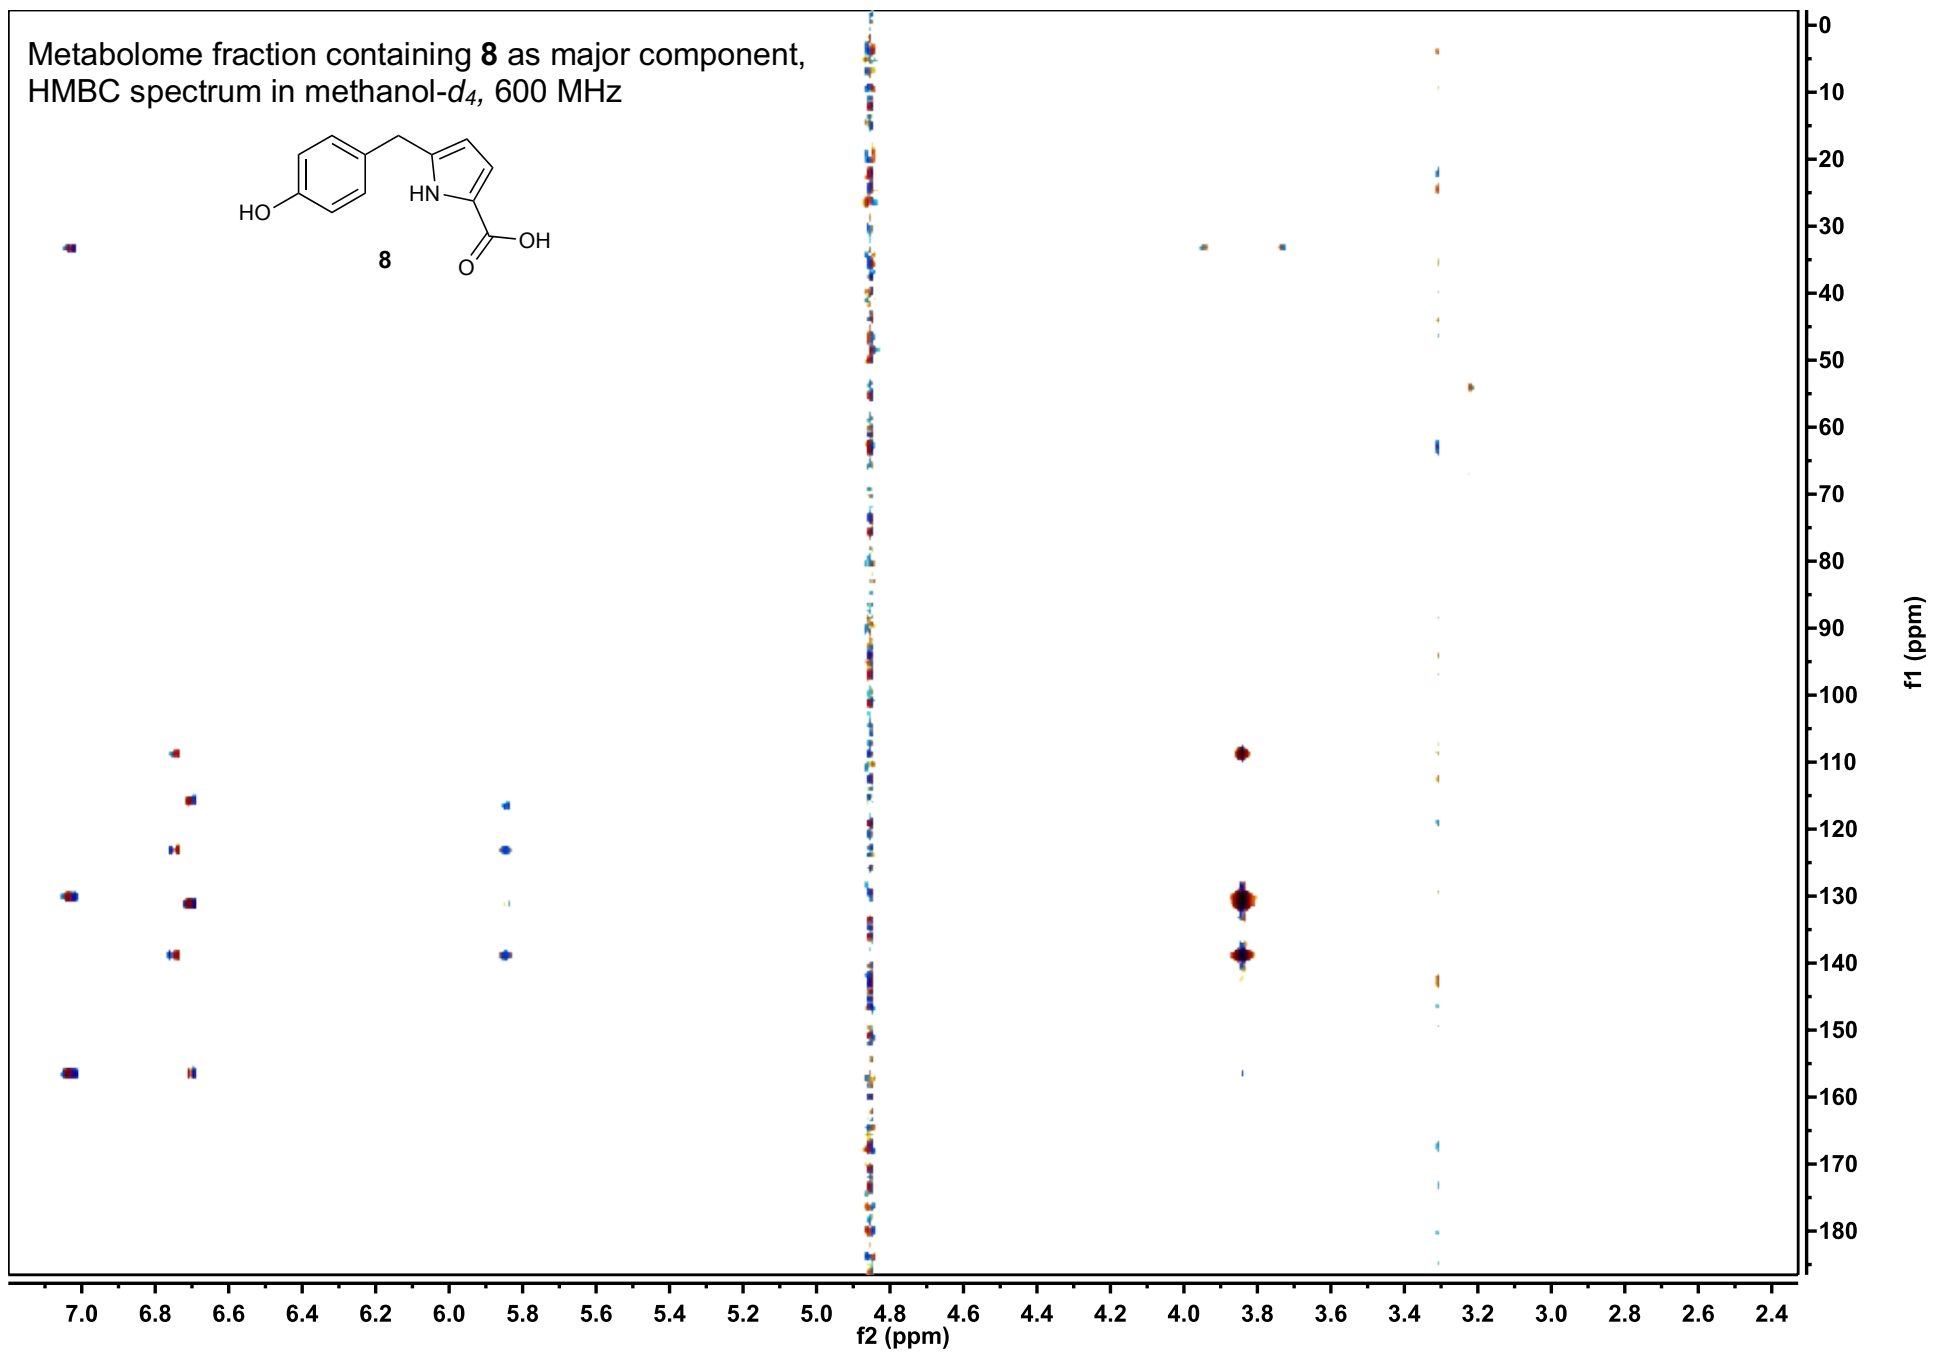



**$^1\text{H}$  (500 MHz) and  $^{13}\text{C}$  (125 MHz) NMR spectroscopic data for compound 11 in water- $d_2$ .**

Chemical shifts were referenced to  $\delta(\text{H}_2\text{O}) = 2.79$  and  $\delta(^{13}\text{C}_3\text{H}_7\text{OD}) = 49.0$ .  $^{13}\text{C}$  chemical shifts were determined via an HMBC and HSQC spectrum.  $^1\text{H}$ ,  $^1\text{H}$ - $J$ -coupling constants were determined from the acquired  $^1\text{H}$  spectrum. HMBC correlations are from the proton(s) stated to the indicated  $^{13}\text{C}$  atom.

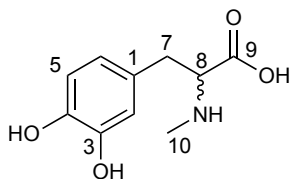

| No. | $\delta_c$ | Proton            | $\delta\text{H}$ ( $J_{\text{HH}}$ [Hz]) | HMBC          |
|-----|------------|-------------------|------------------------------------------|---------------|
| 1   | 127.21     |                   |                                          |               |
| 2   | 117.10     | 2-H               | 6.84 ( $J_{2,6} = 1.8$ )                 | 4, 6, 7       |
| 3   | 144.36     |                   |                                          |               |
| 4   | 143.63     |                   |                                          |               |
| 5   | 116.49     | 5-H               | 6.92 ( $J_{5,6} = 8.0$ )                 | 1, 3          |
| 6   | 121.86     | 6-H               | 6.76 ( $J_{6,5} = 8.0, J_{6,2} = 1.8$ )  | 2, 4, 5, 7    |
| 7   | 35.06      | 7-H <sub>2</sub>  | 3.14 ( $J_{7,8} = 6.0$ )                 | 1, 2, 6, 8, 9 |
| 8   | 64.71      | 8-H               | 3.82 ( $J_{8,7} = 6.0$ )                 | 1, 7, 9, 10   |
| 9   | 173.12     |                   |                                          |               |
| 10  | 32.16      | 10-H <sub>3</sub> | 2.71                                     | 8             |

Compound **11**,  $^1\text{H}$  NMR spectrum in  $\text{D}_2\text{O}$ , 600 MHz

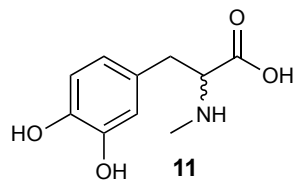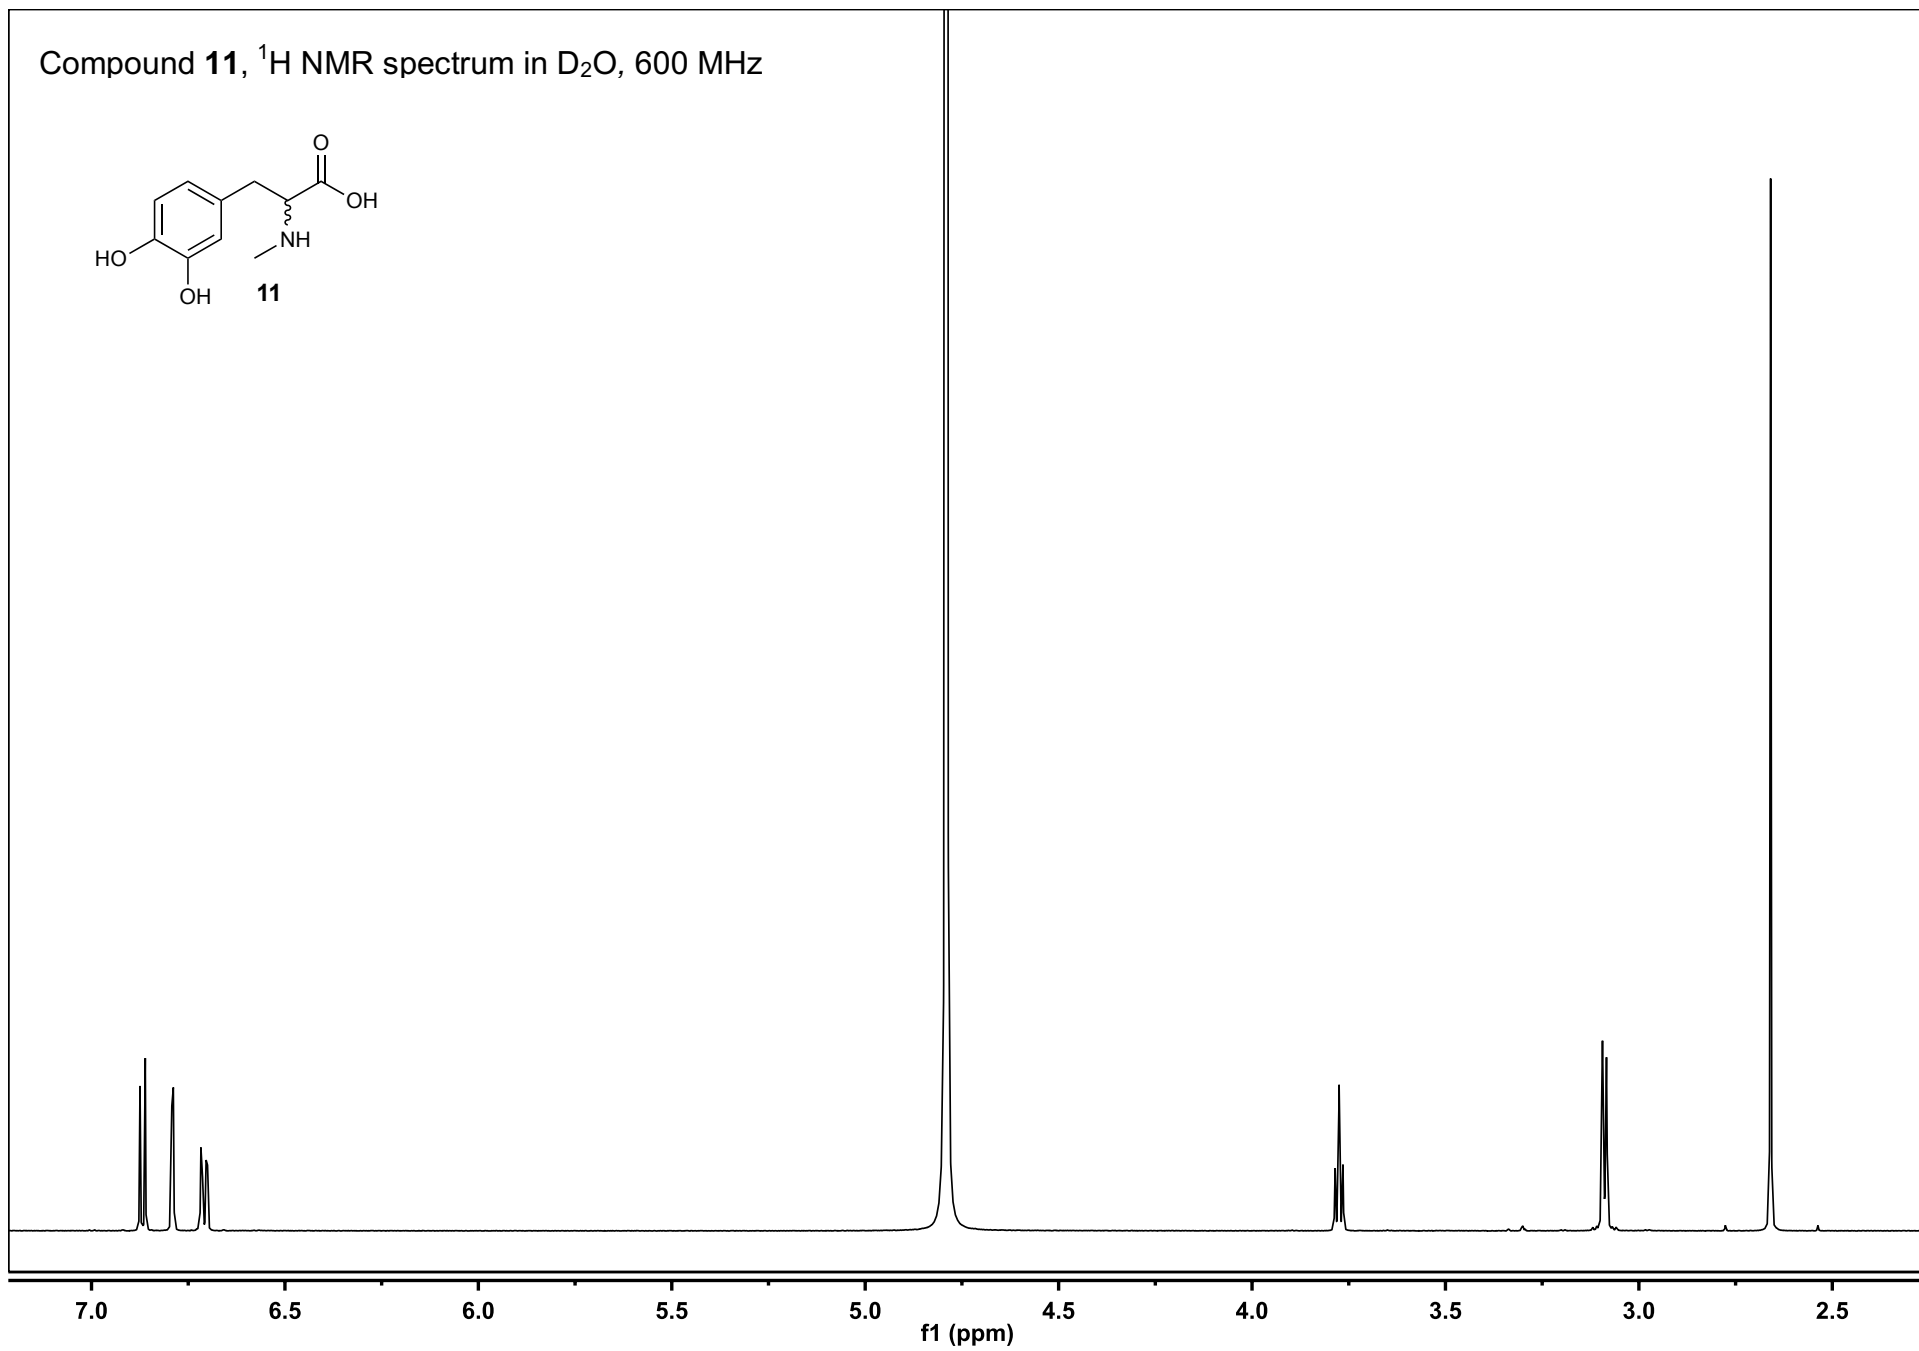

Compound **11**,  $^{13}\text{C}$  NMR spectrum in  $\text{D}_2\text{O}$ , 500 MHz

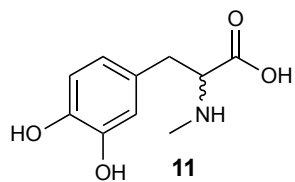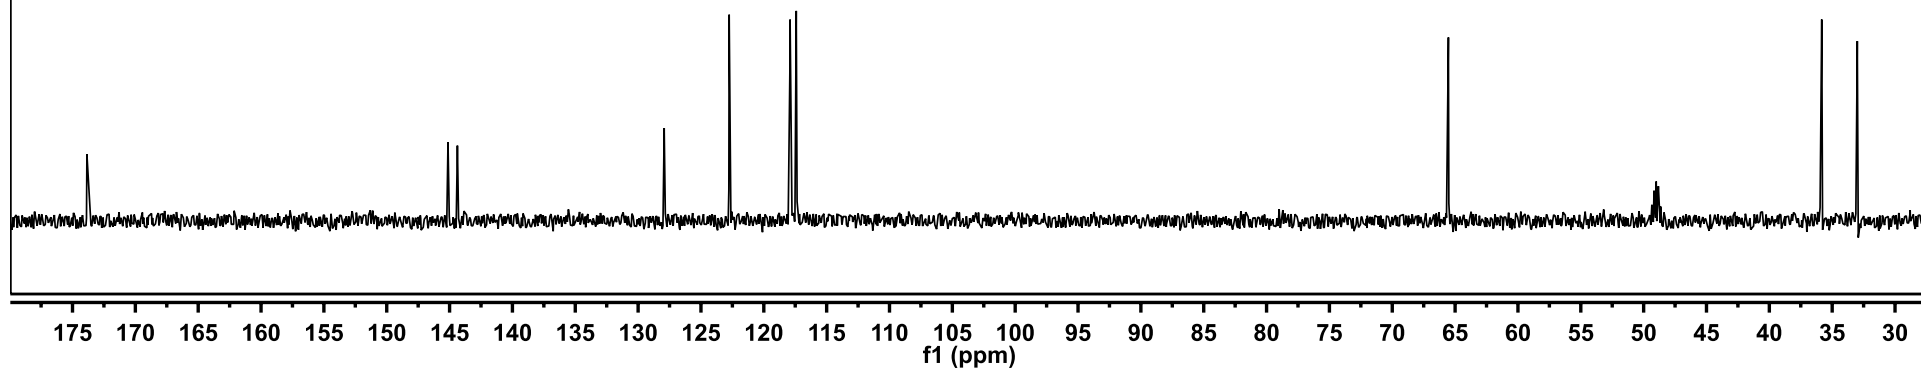

Compound 11, HMBC NMR spectrum in D<sub>2</sub>O, 500 MHz

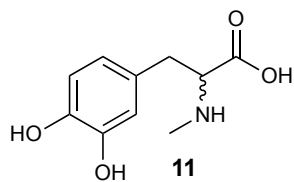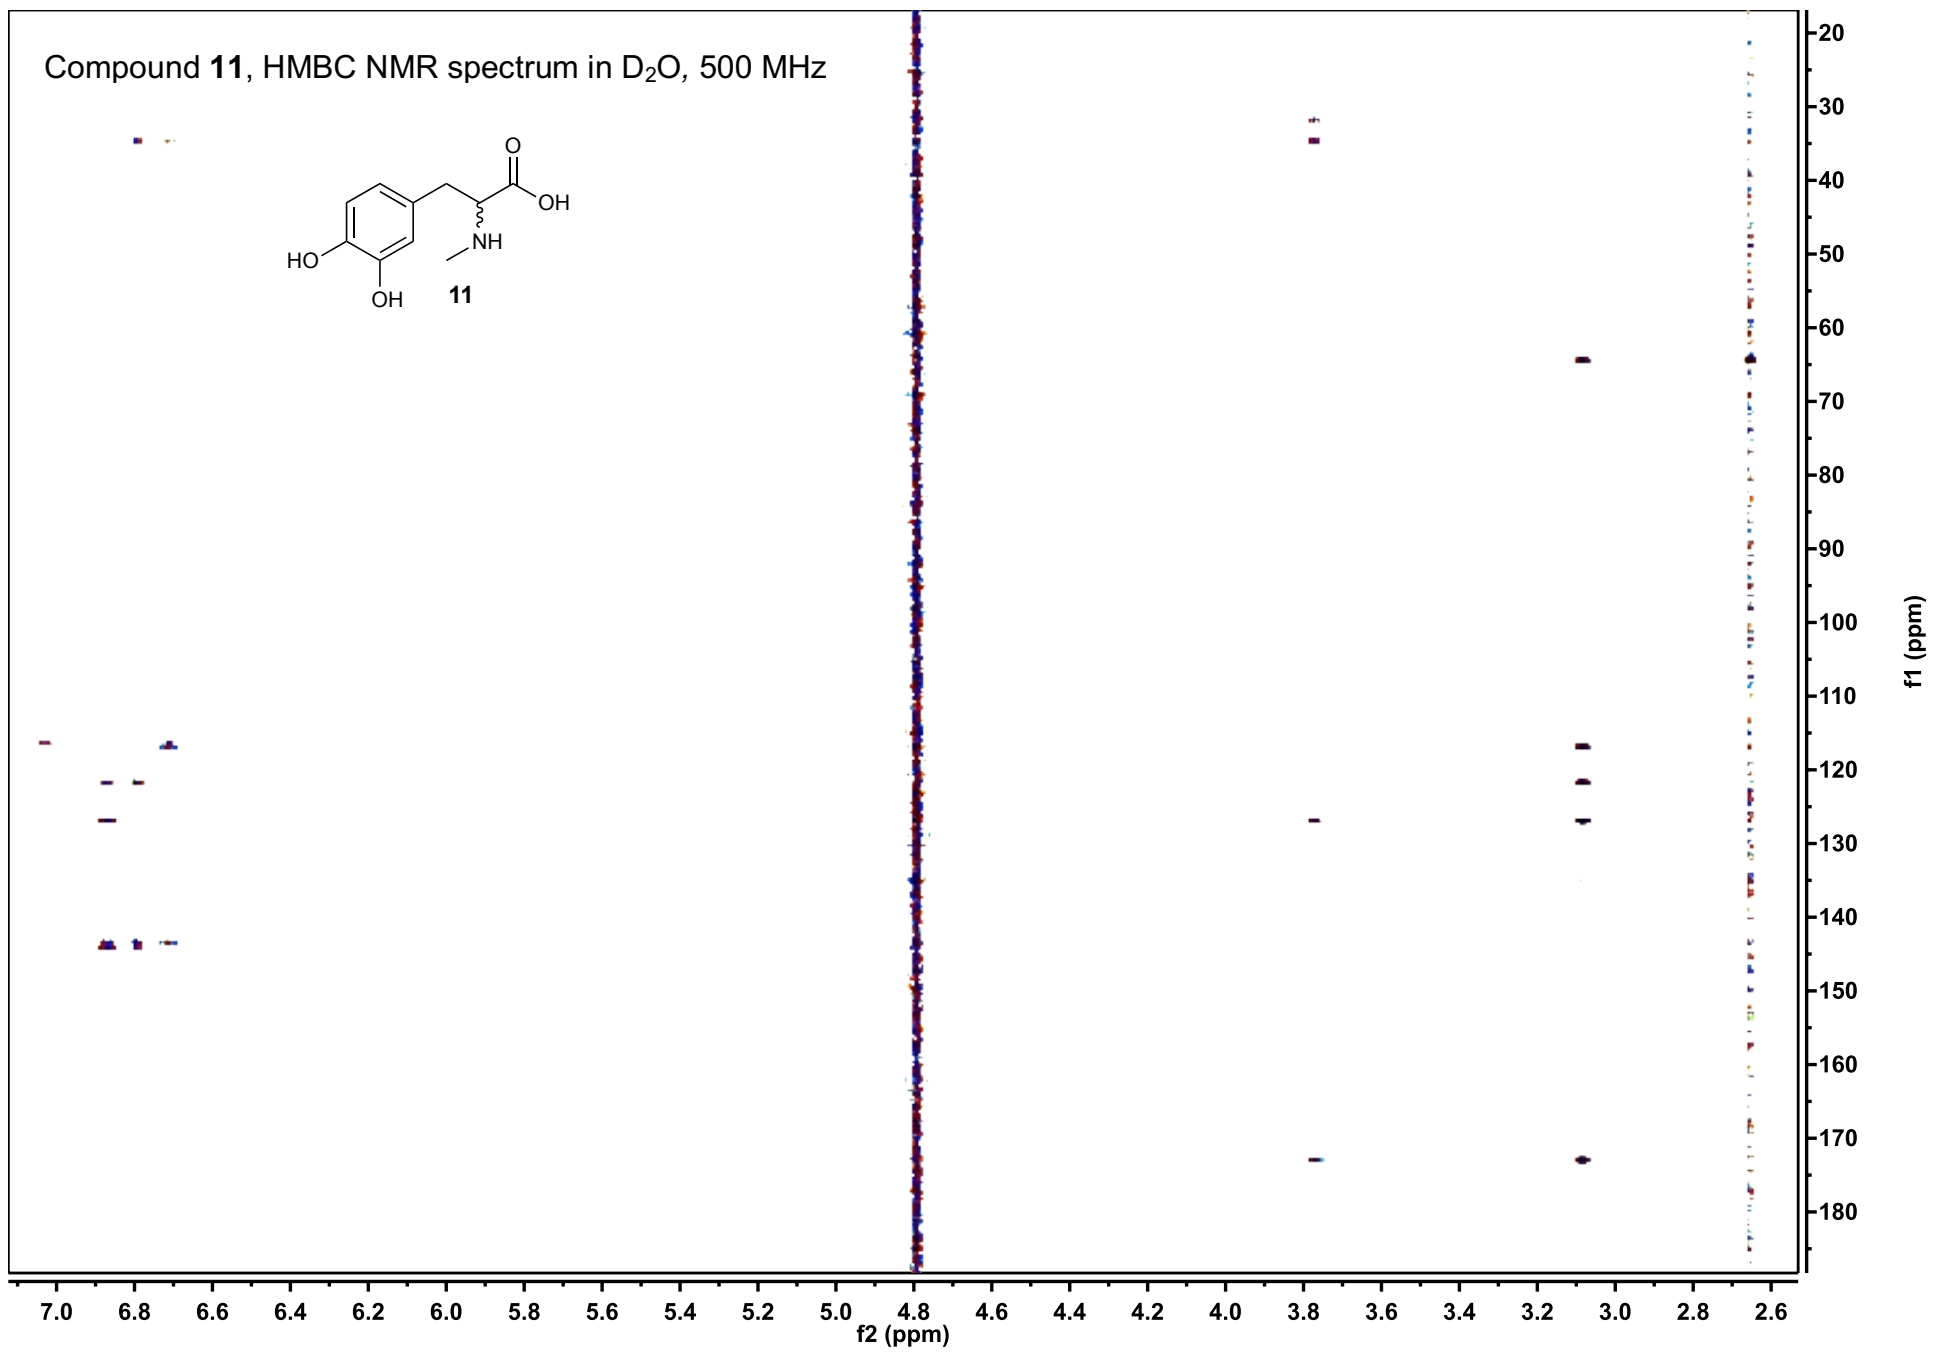

**<sup>1</sup>H (600 MHz) and <sup>13</sup>C (151 MHz) NMR spectroscopic data for compound 12 in water-*d*<sub>2</sub>.**

Chemical shifts were referenced to  $\delta(\text{HOD}) = 2.79$  and  $\delta(^{13}\text{CCH}_3\text{OD}) = 49.0$ . <sup>13</sup>C chemical shifts were determined via an HMBC and HSQC spectrum. <sup>1</sup>H, <sup>1</sup>H-*J*-coupling constants were determined from the acquired <sup>1</sup>H spectrum. HMBC correlations are from the proton(s) stated to the indicated <sup>13</sup>C atom.

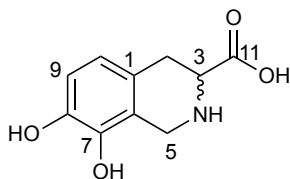

| No. | $\delta_c$ | Proton | $\delta\text{H}$ ( $J_{\text{HH}}[\text{Hz}]$ ) | HMBC            |
|-----|------------|--------|-------------------------------------------------|-----------------|
| 1   | 124.11     |        |                                                 |                 |
| 2   | 28.50      | 2-Ha   | 3.08 ( $J_{2a,2b} = 16.0$ , $J_{2a,3} = 11.5$ ) | 1, 3, 6, 10, 11 |
|     |            | 2-Hb   | 3.32 ( $J_{2b,2a} = 16.0$ , $J_{2b,3} = 5.0$ )  | 1, 3, 6, 10, 11 |
| 3   | 56.25      | 3-H    | 3.98 ( $J_{3,2a} = 11.5$ , $J_{3,2b} = 5.0$ )   | 1, 2, 5, 11     |
| 4   |            | 4-NH   |                                                 |                 |
| 5   | 40.60      | 5-Ha   | 4.25 ( $J_{5a,5b} = 16.0$ )                     | 1, 3, 6, 7      |
|     |            | 5-Hb   | 4.54 ( $J_{5b,5a} = 16.0$ )                     | 1, 3, 6, 7      |
| 6   | 116.69     |        |                                                 |                 |
| 7   | 140.97     |        |                                                 |                 |
| 8   | 142.61     |        |                                                 |                 |
| 9   | 116.49     | 9-H    | 6.93 ( $J_{9,10} = 8.4$ )                       | 1, 7            |
| 10  | 121.86     | 10-H   | 6.80 ( $J_{10,9} = 8.4$ )                       | 2, 6, 8         |
| 11  | 173.12     |        |                                                 |                 |

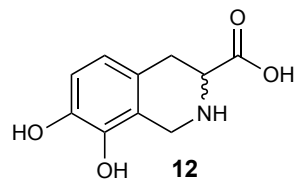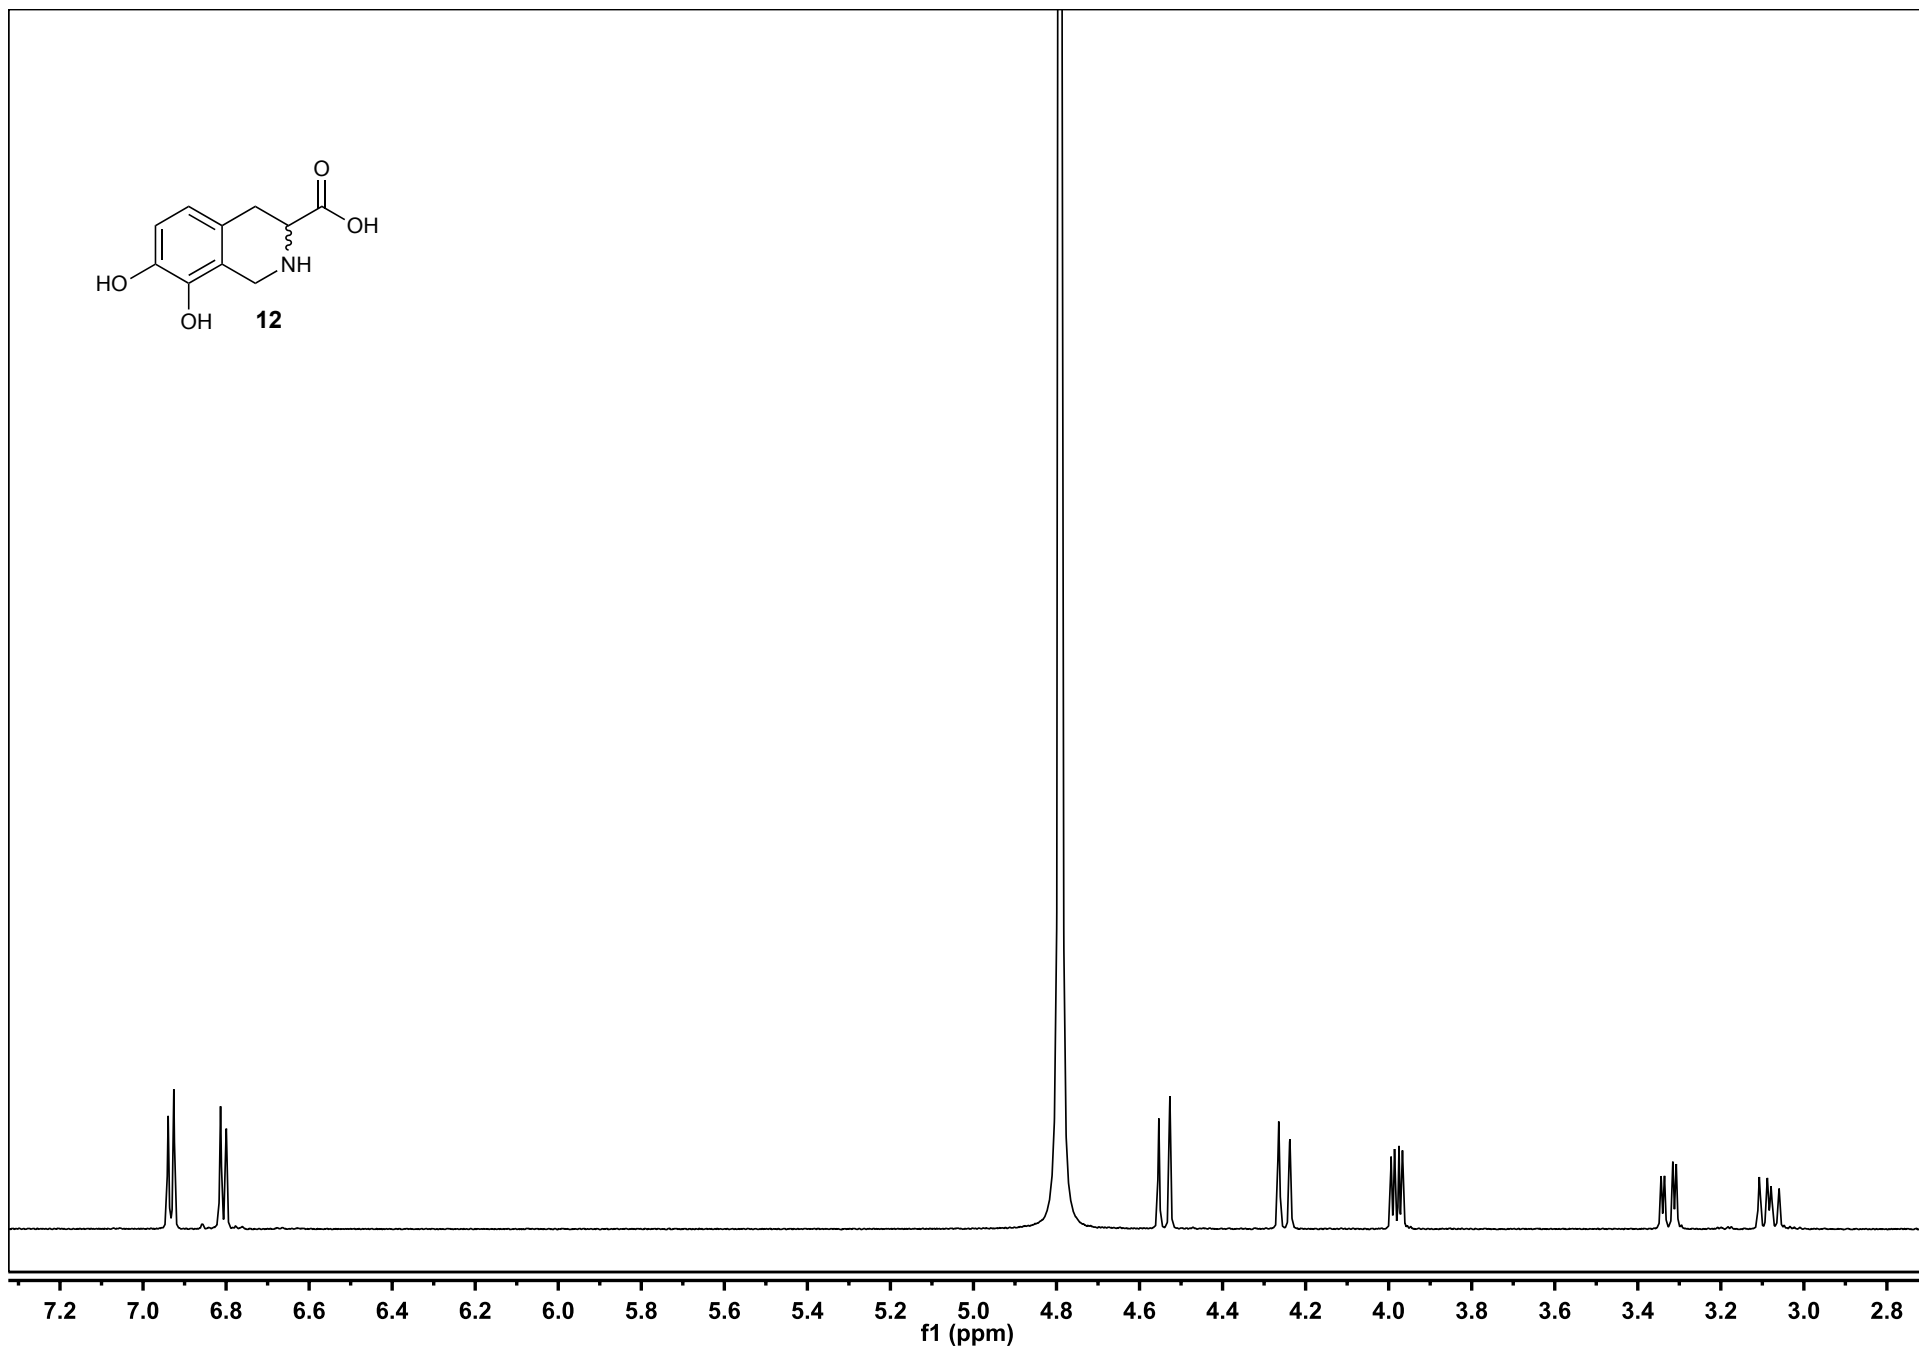

Compound **12**, HMBC spectrum in D<sub>2</sub>O, 600 MHz

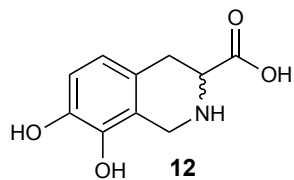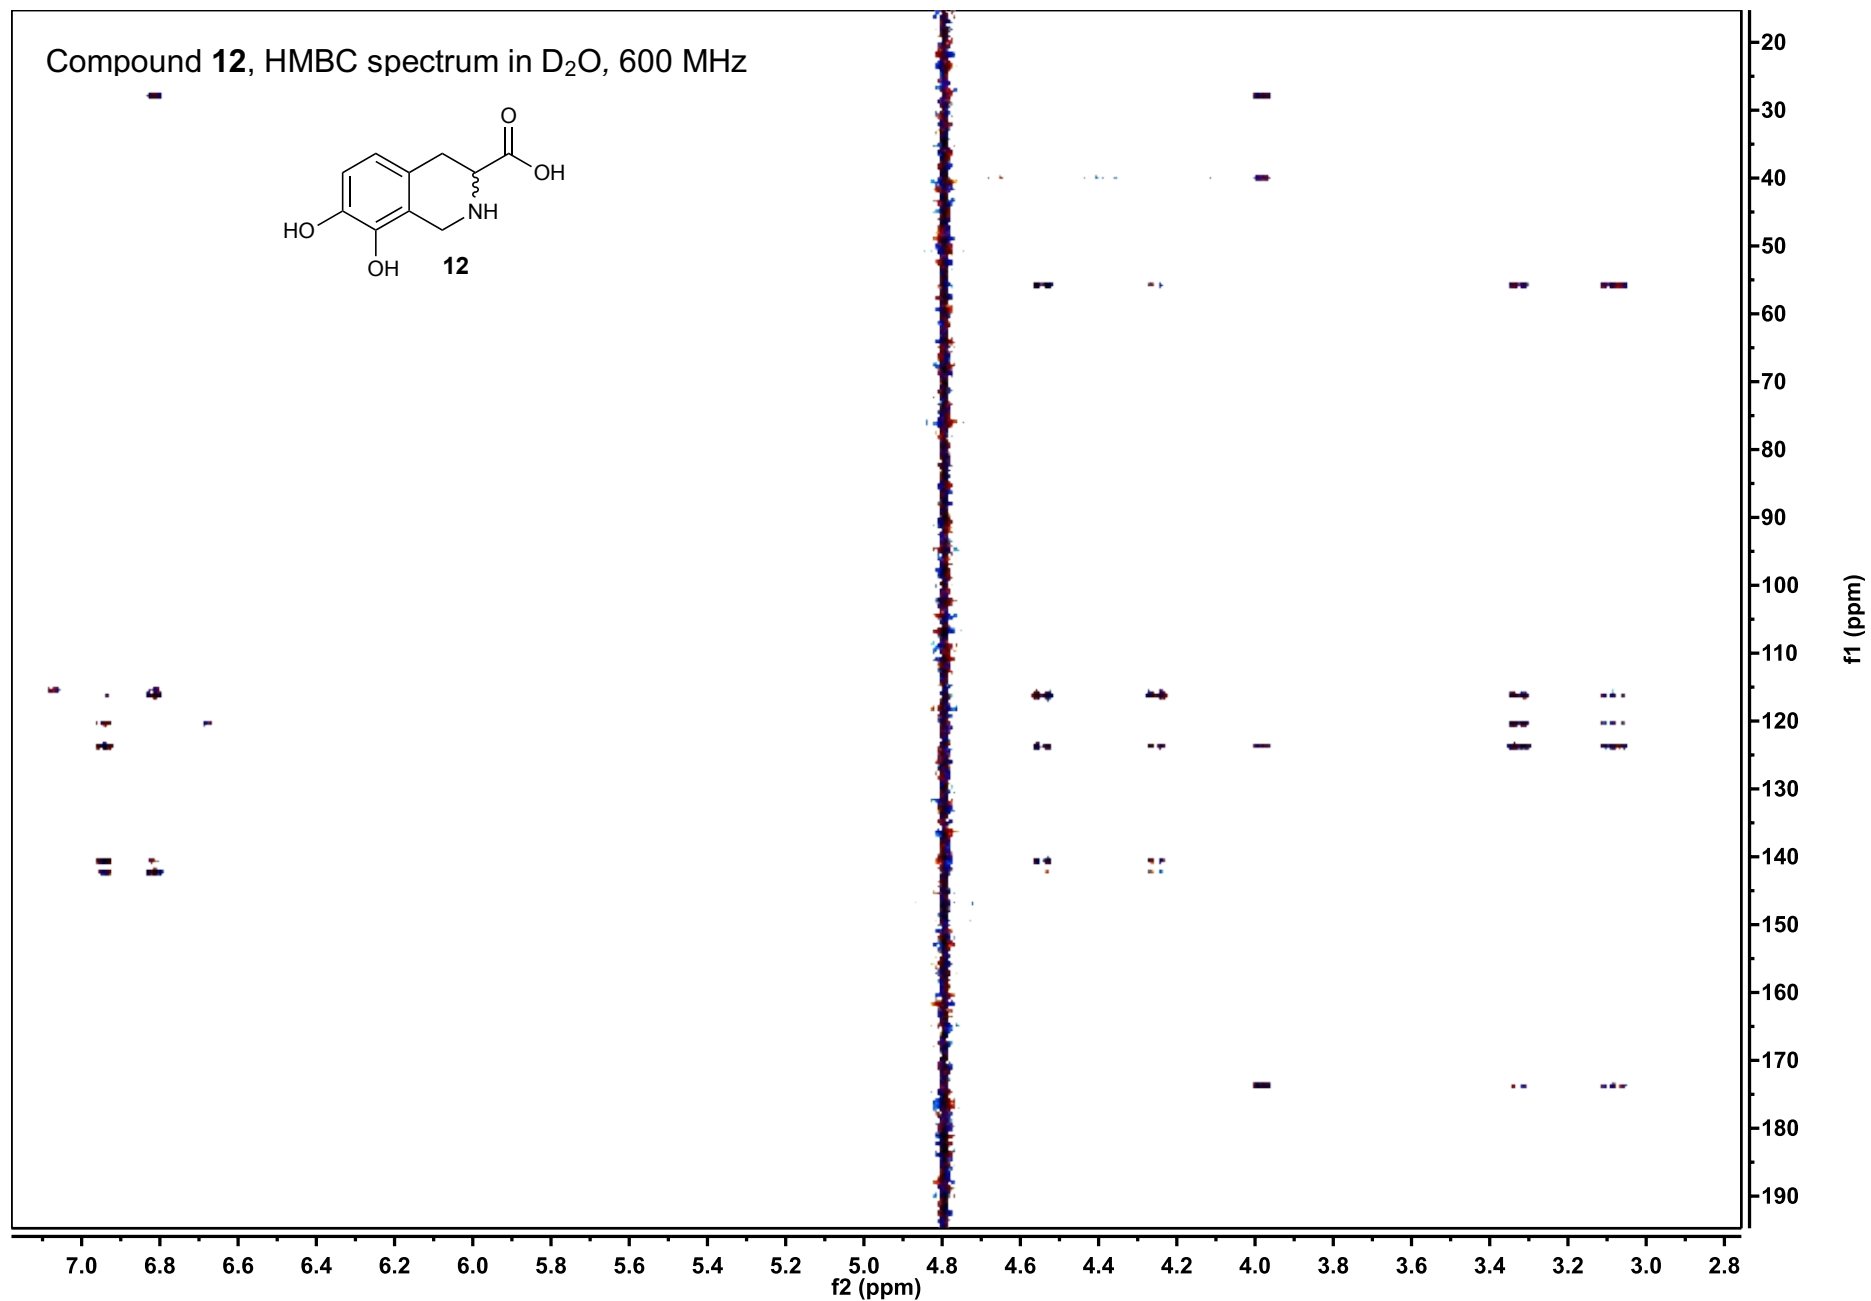

Compound **12**, decoupled HSQC spectrum in D<sub>2</sub>O, 600 MHz

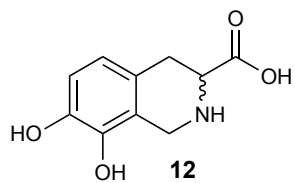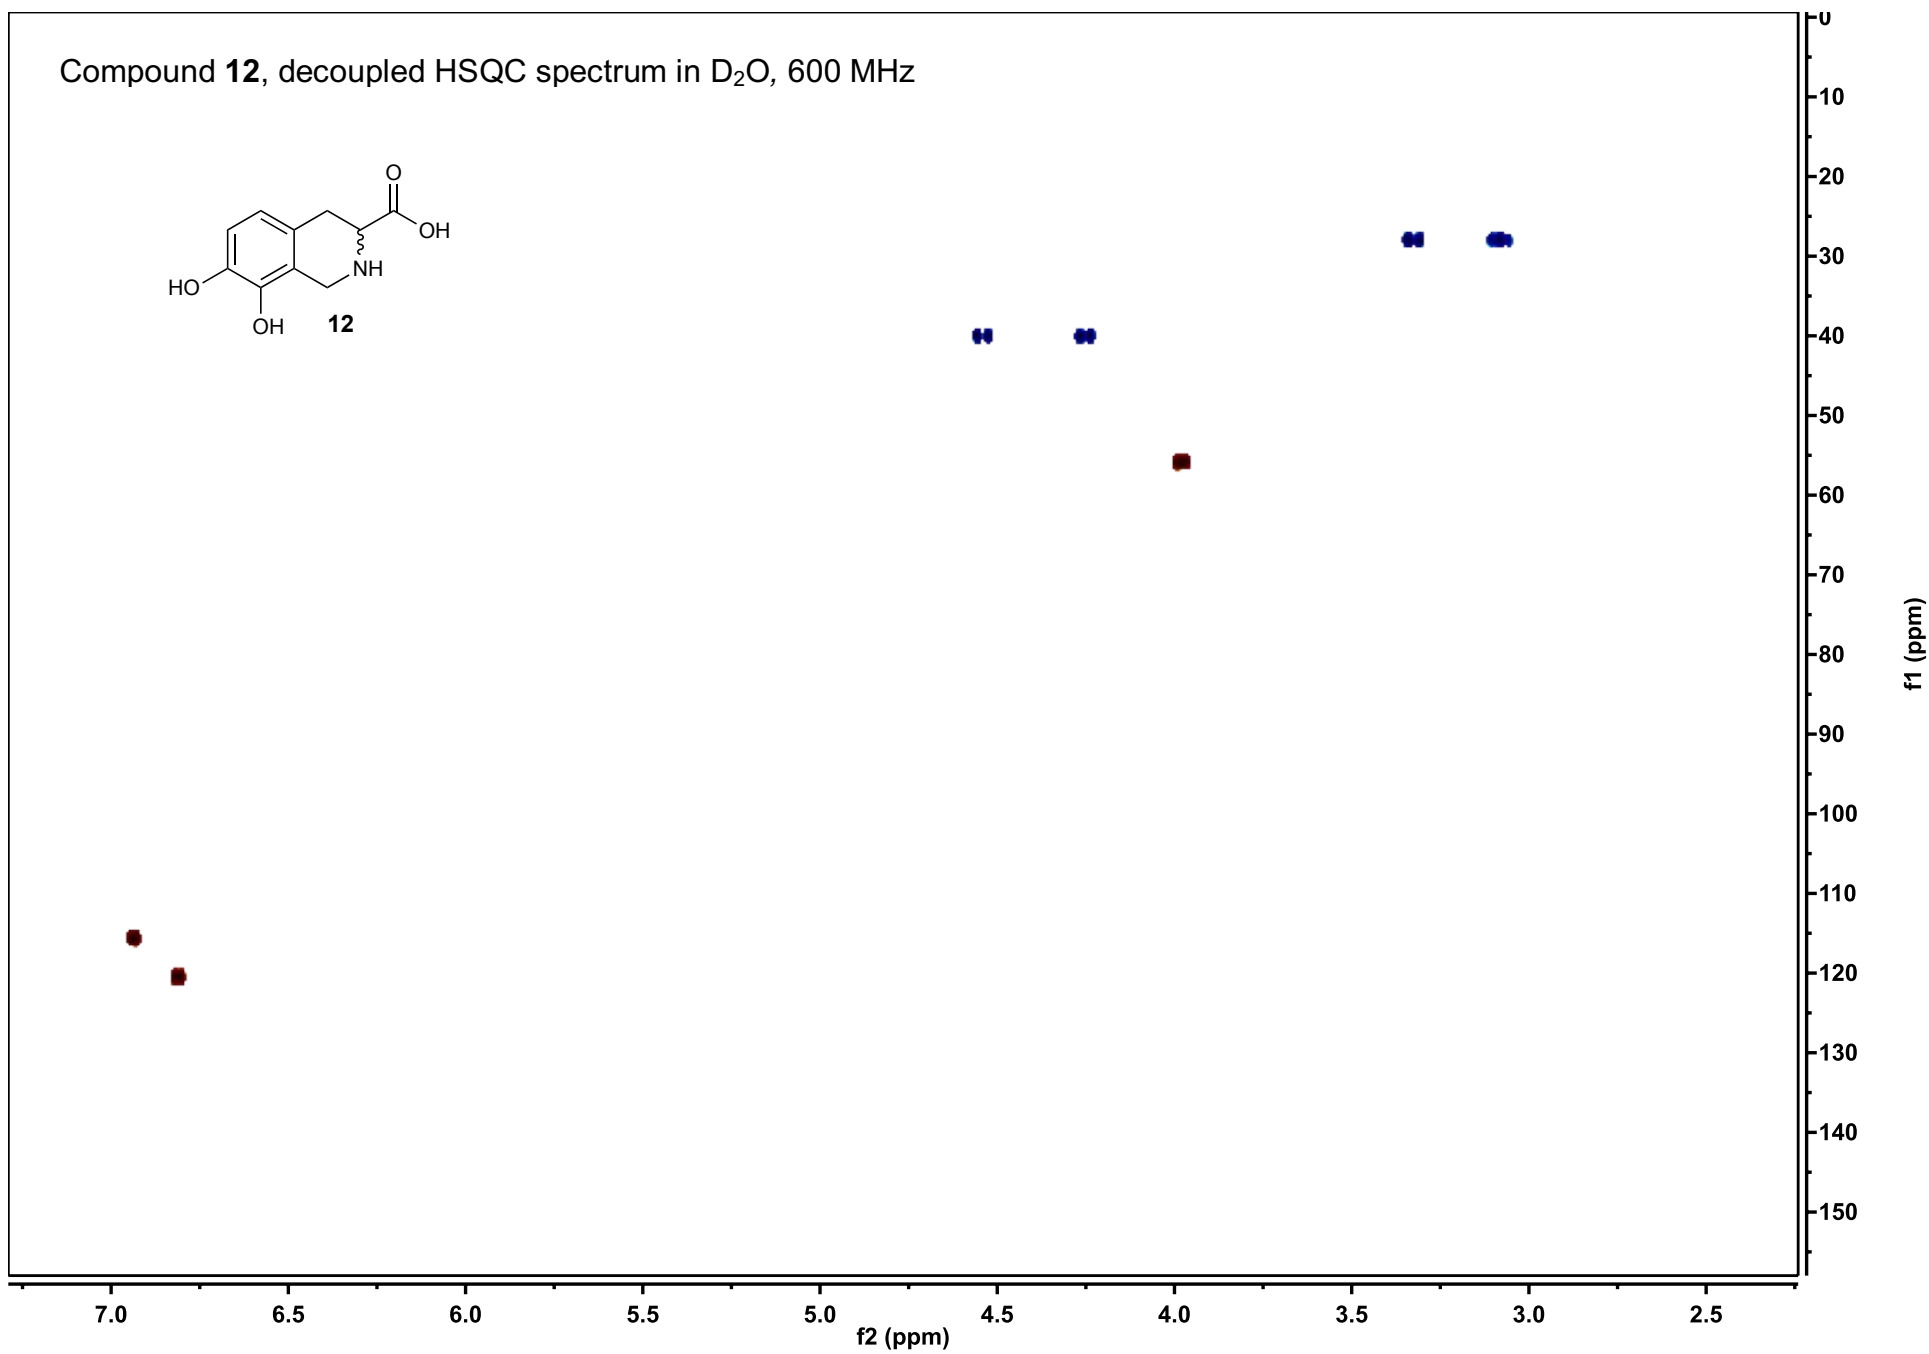



**<sup>1</sup>H (600 MHz) and <sup>13</sup>C (151 MHz) NMR spectroscopic data for compound 18 in DMSO-*d*<sub>6</sub>.**

Chemical shifts were referenced to  $\delta(\text{CHD}_2\text{SOCD}_3) = 2.50$  and  $\delta(^{13}\text{CCHD}_2\text{SOCD}_3) = 39.52$ . <sup>13</sup>C chemical shifts were determined via HMBC and HSQC spectra. <sup>1</sup>H, <sup>1</sup>H-*J*-coupling constants were determined from the acquired <sup>1</sup>H spectrum. NOESY correlations were observed using a mixing time of 600 ms. HMBC correlations are from the proton(s) stated to the indicated <sup>13</sup>C atom.

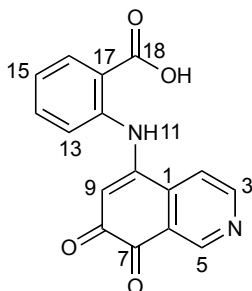

| No. | $\delta_c$ | Proton | $\delta H (J_{HH}[\text{Hz}])$              | HMBC <sup>a</sup> | NOESY |
|-----|------------|--------|---------------------------------------------|-------------------|-------|
| 1   | 140.40     |        |                                             |                   |       |
| 2   | 117.23     | 2-H    | 8.05 ( $J_{2,3} = 5.2$ )                    | 3, 6, 7, 10       |       |
| 3   | 154.59     | 3-H    | 9.02 ( $J_{3,2} = 5.2$ )                    | 1, 2, 5           |       |
| 4   |            |        |                                             |                   |       |
| 5   | 148.00     | 5-H    | 9.08 ( $J_{5,2} = 2.3$ )                    | 1, 3, 6, 7        |       |
| 6   | 125.13     |        |                                             |                   |       |
| 7   | 181.43     |        |                                             |                   |       |
| 8   | 175.31     |        |                                             |                   |       |
| 9   | 102.40     | 9-H    | 6.45                                        | 1, 7, 8, 10w      | 13    |
| 10  | 149.45     |        |                                             |                   |       |
| 11  |            | 11-NH  |                                             |                   |       |
| 12  | 142.36     |        |                                             |                   |       |
| 13  | 120.03     | 13-H   | 7.48 ( $J_{13,14} = 8.5$ )                  | 15, 17            | 9     |
| 14  | 130.23     | 14-H   | 7.45 ( $J_{14,13} = 8.5, J_{14,15} = 7.5$ ) | 12, 16            |       |
| 15  | 122.68     | 15-H   | 7.11 ( $J_{15,14} = 7.5, J_{15,16} = 7.5$ ) | 13, 17            |       |
| 16  | 131.10     | 16-H   | 8.01 ( $J_{16,15} = 7.5$ )                  | 12, 14, 18        |       |
| 17  | 126.86     |        |                                             |                   |       |
| 18  | 168.47     |        |                                             |                   |       |

<sup>a</sup>w: weak correlation (less than ~10% of the intensity of strongest signal)

Metabolome fraction, containing  
shunt metabolite **18** as the major  
component,  $^1\text{H}$  NMR spectrum,  
DMSO- $d_6$ , 600 MHz

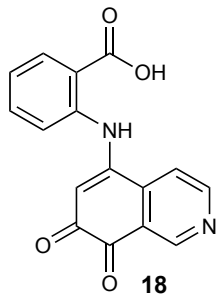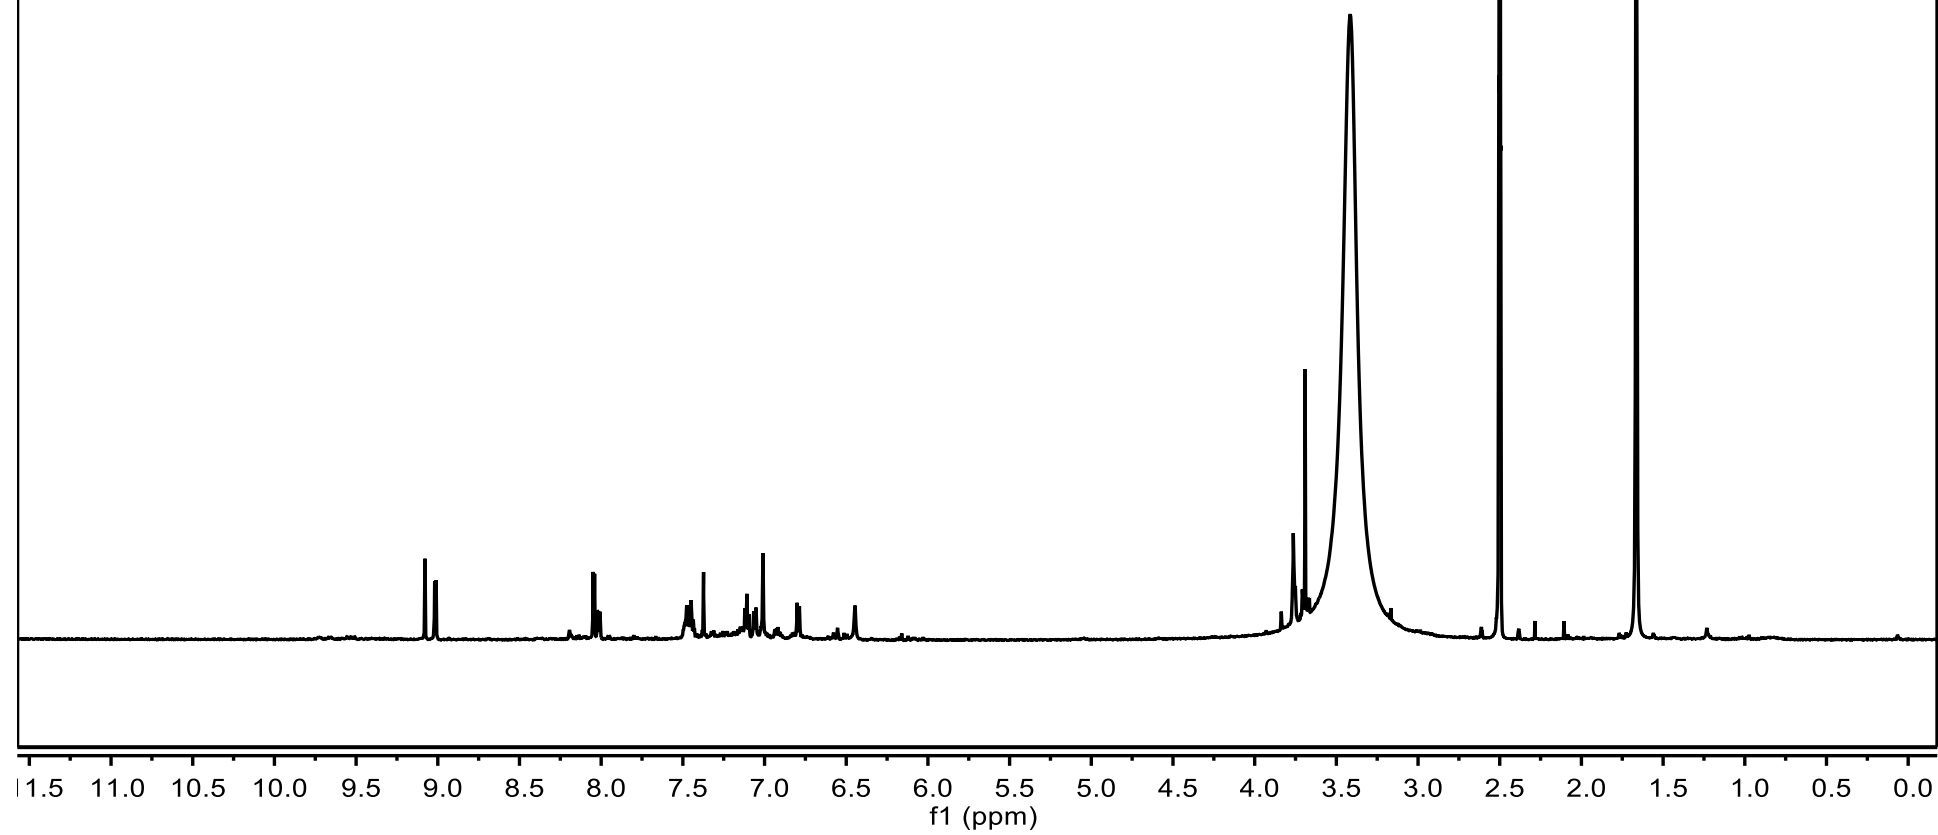

Metabolome fraction, containing  
shunt metabolite **18** as the major  
component, dqfCOSY spectrum,  
DMSO-*d*<sub>6</sub>, 600 MHz

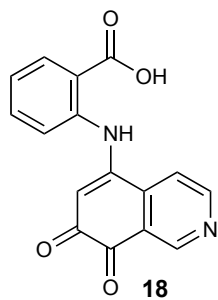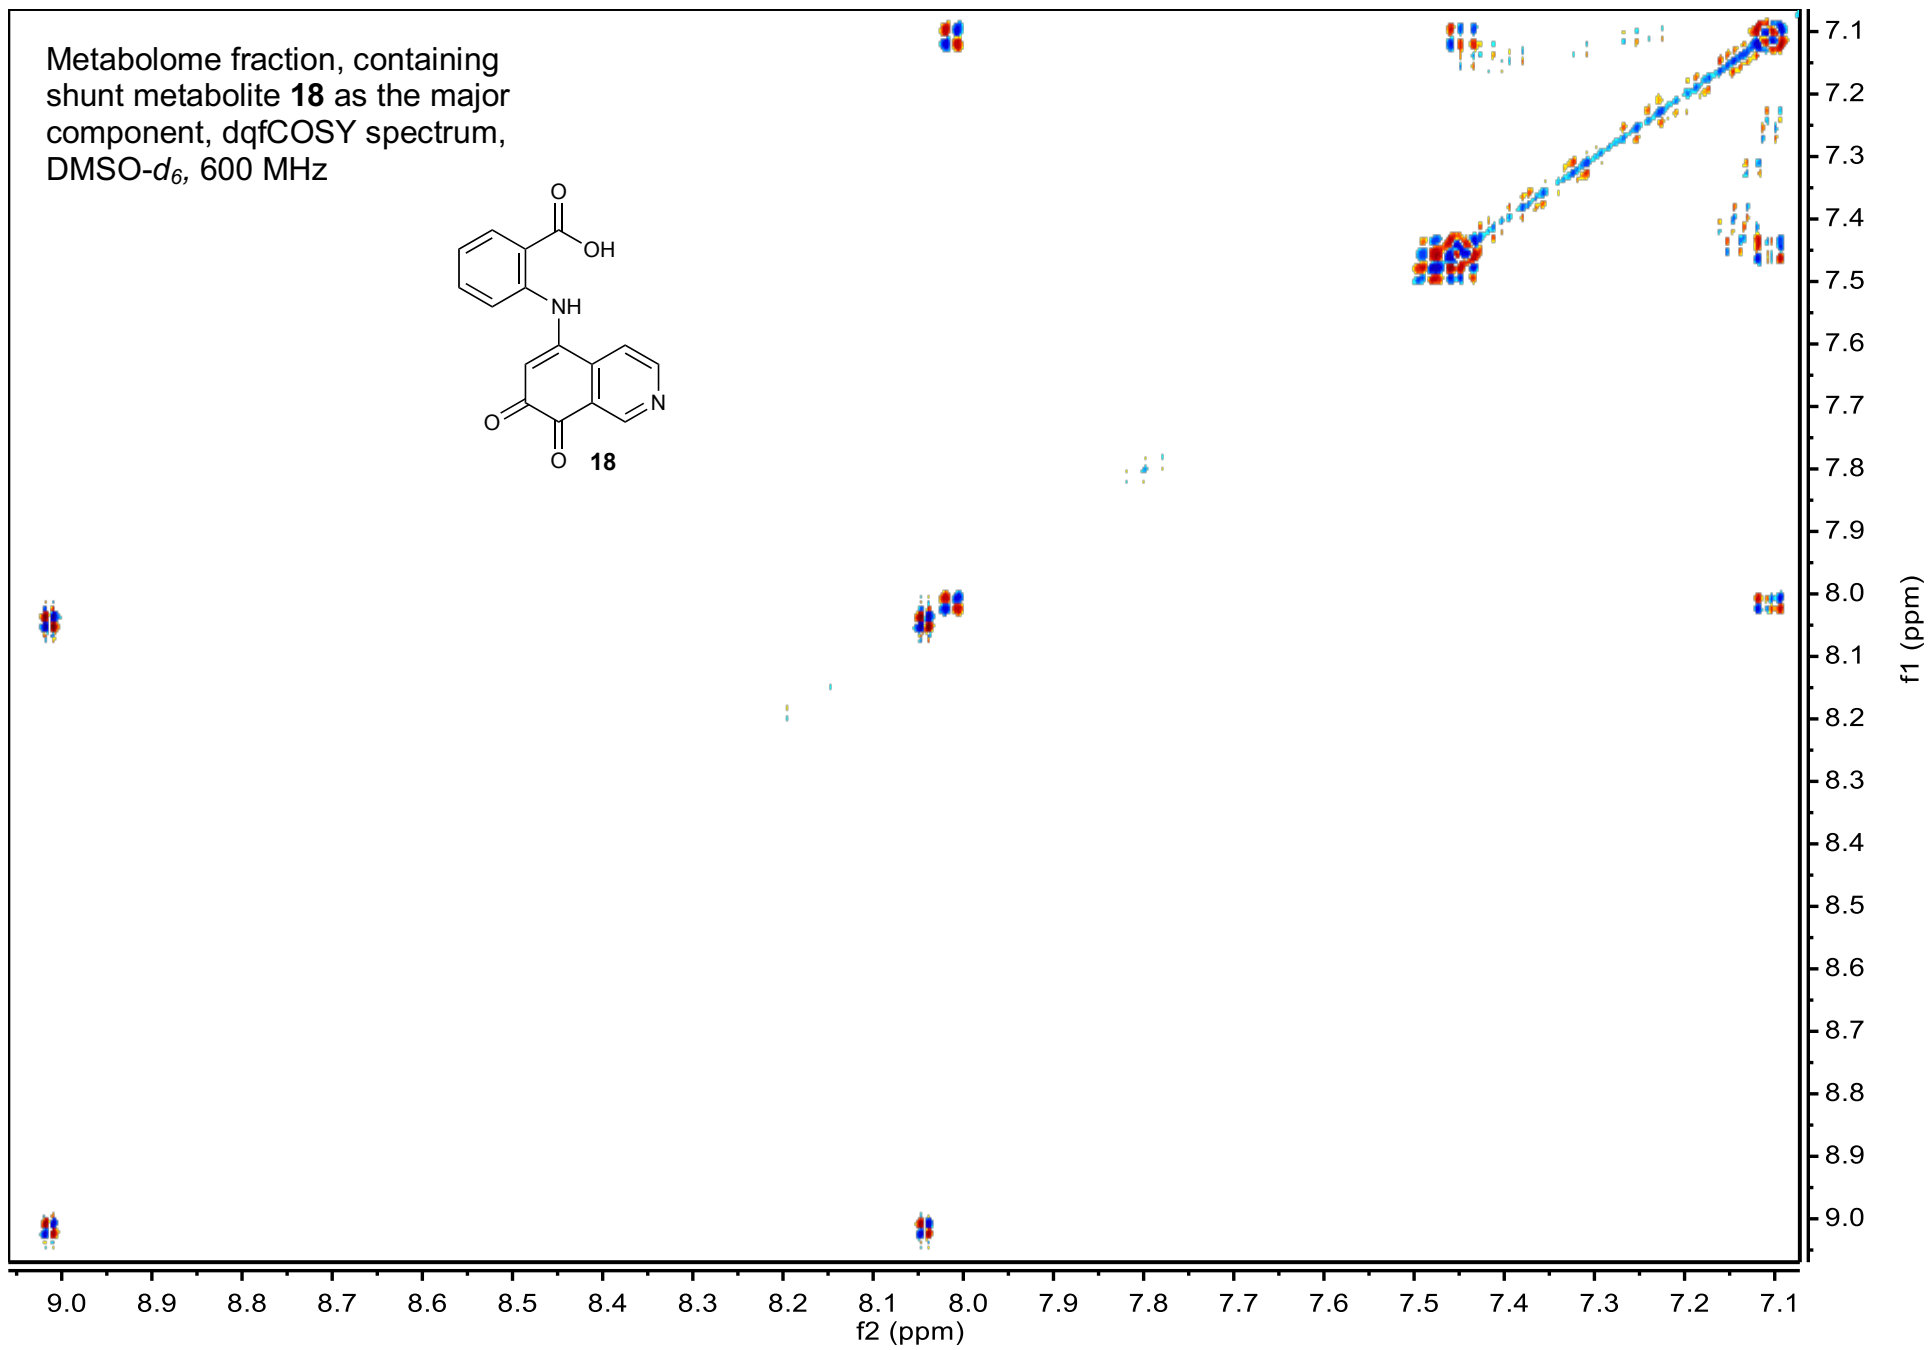

Metabolome fraction, containing  
shunt metabolite **18** as the major  
component, decoupled HSQC  
spectrum, DMSO-*d*<sub>6</sub>, 600 MHz

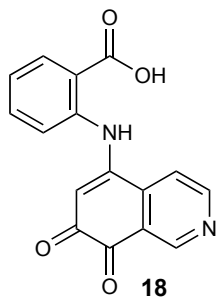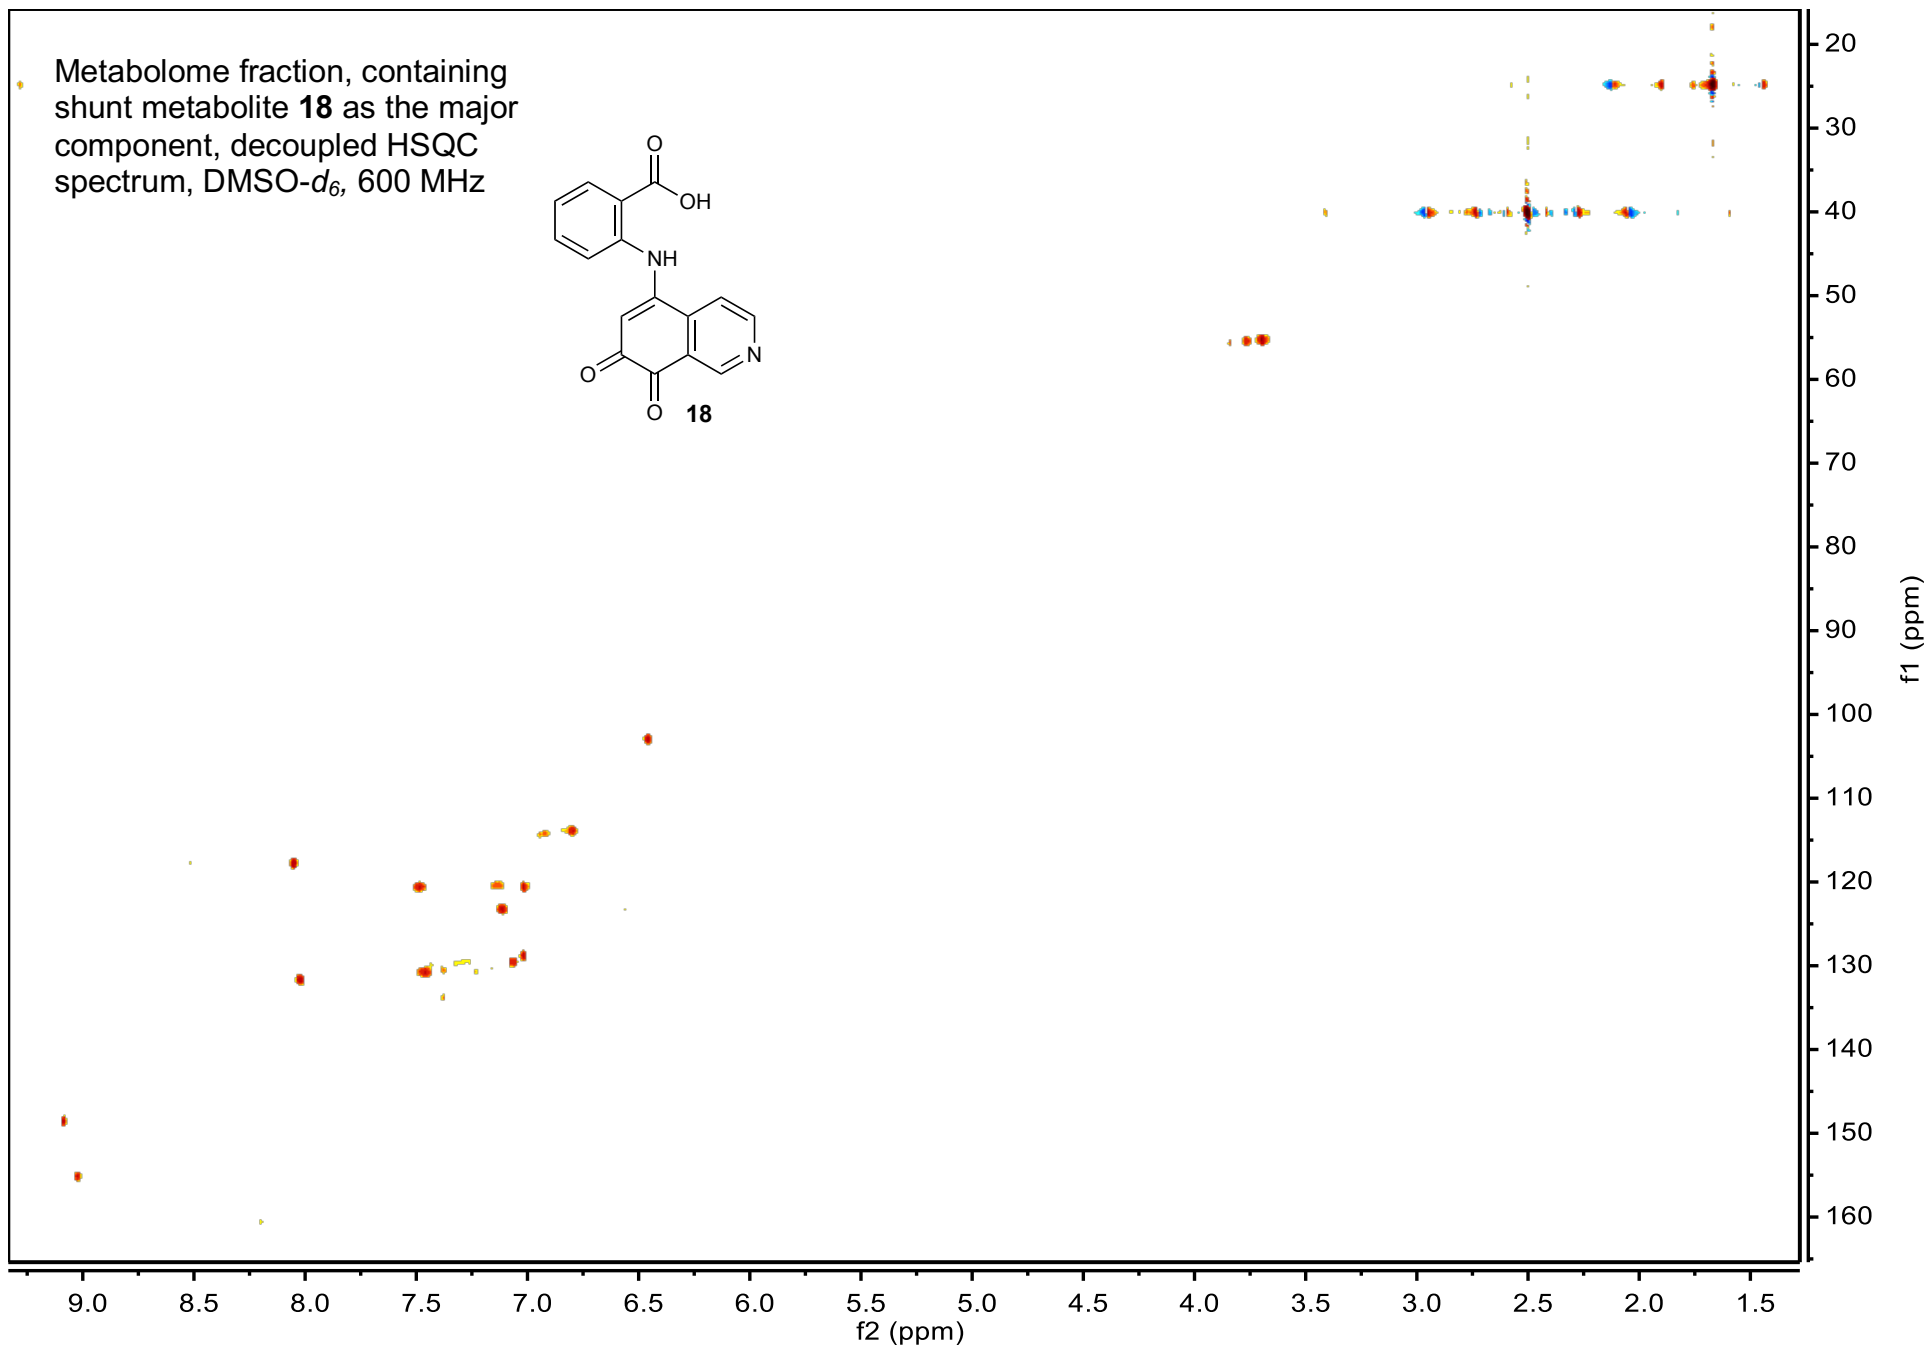

Metabolome fraction, containing  
shunt metabolite **18** as the major  
component, HMBC spectrum,  
DMSO-*d*<sub>6</sub>, 600 MHz

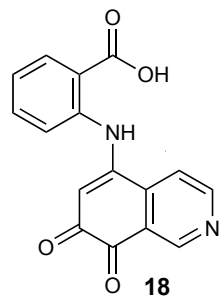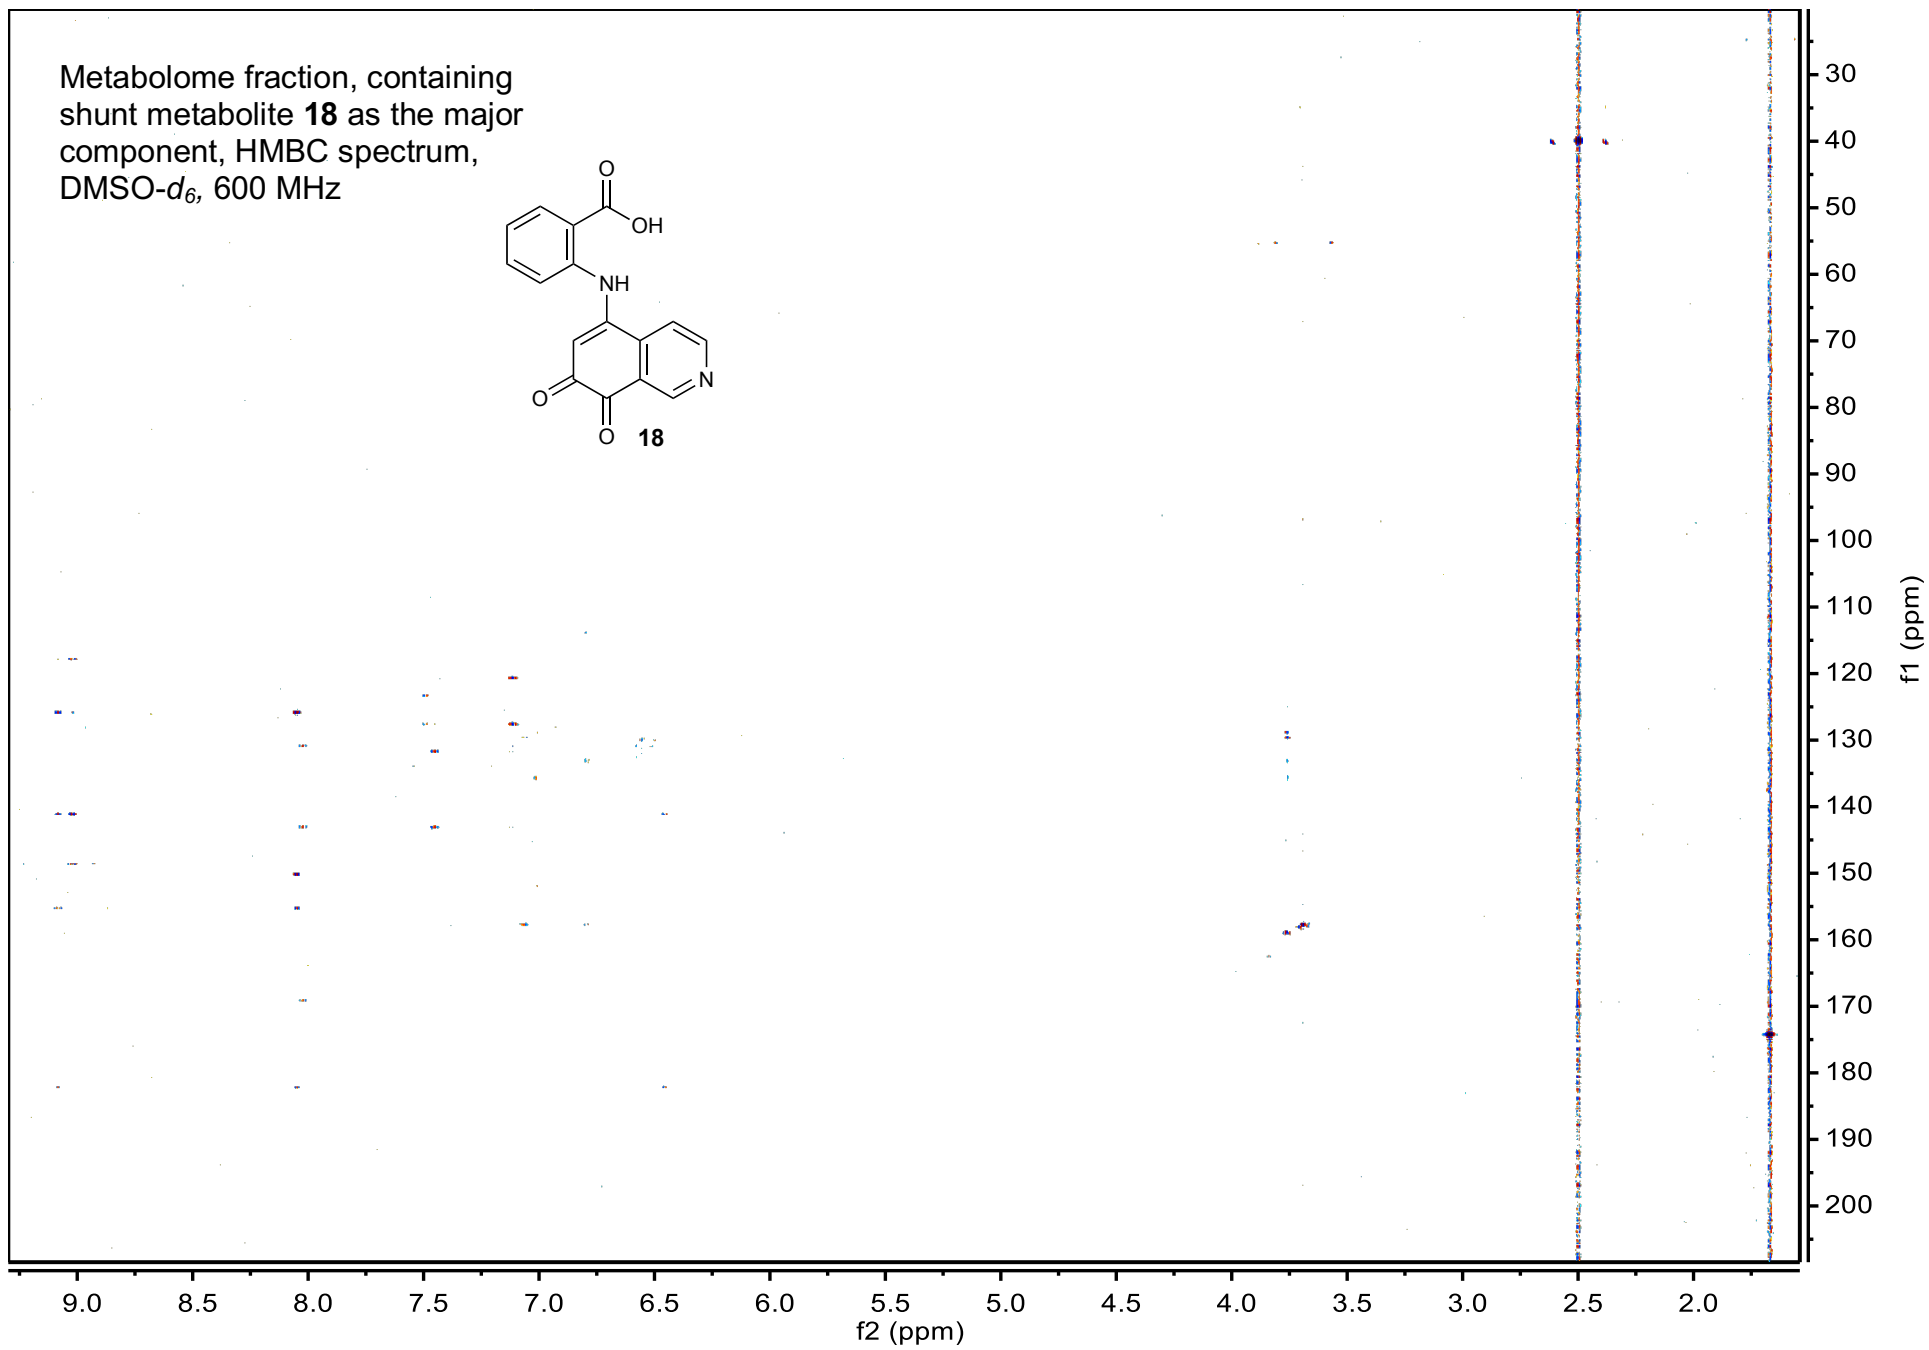

Metabolome fraction, containing  
shunt metabolite **18** as the major  
component, NOESY spectrum,  
DMSO-*d*<sub>6</sub>, 600 MHz

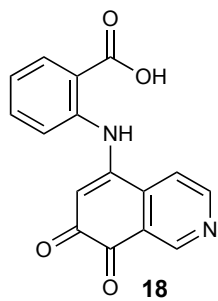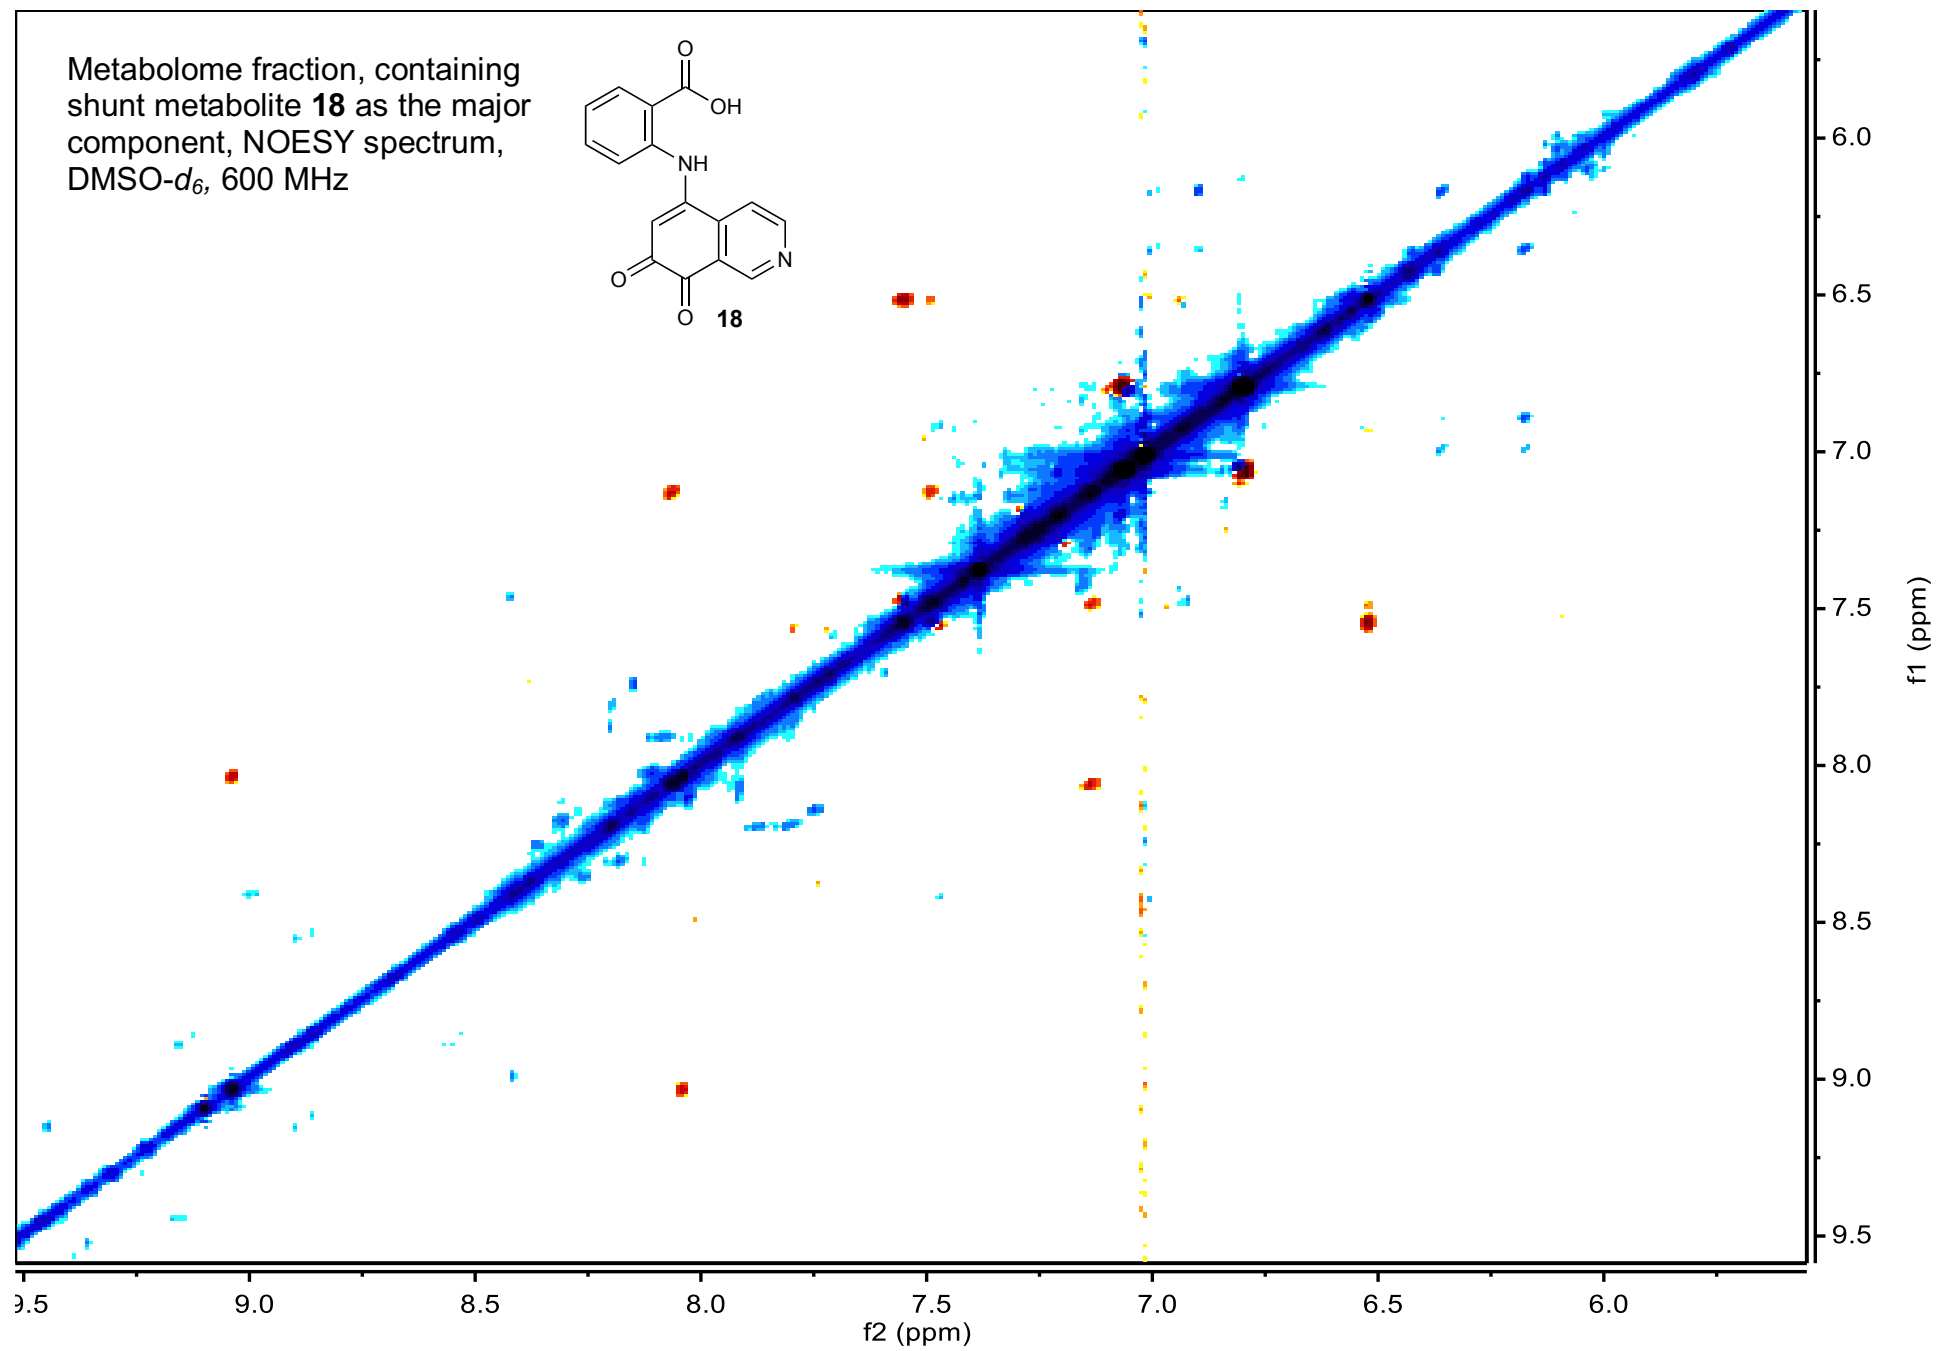

Reaction of **11** with 0.003 equivalents of FsqB in 1 mM phosphate buffer at pH 7,  $^1\text{H}$  NMR spectrum in  $\text{D}_2\text{O}$ , 600 MHz, also see Figure 5

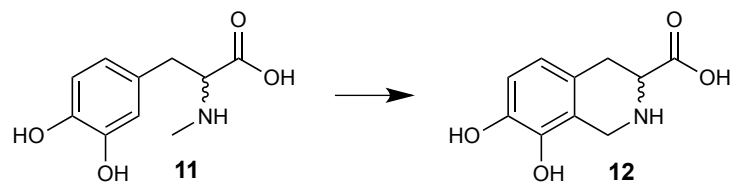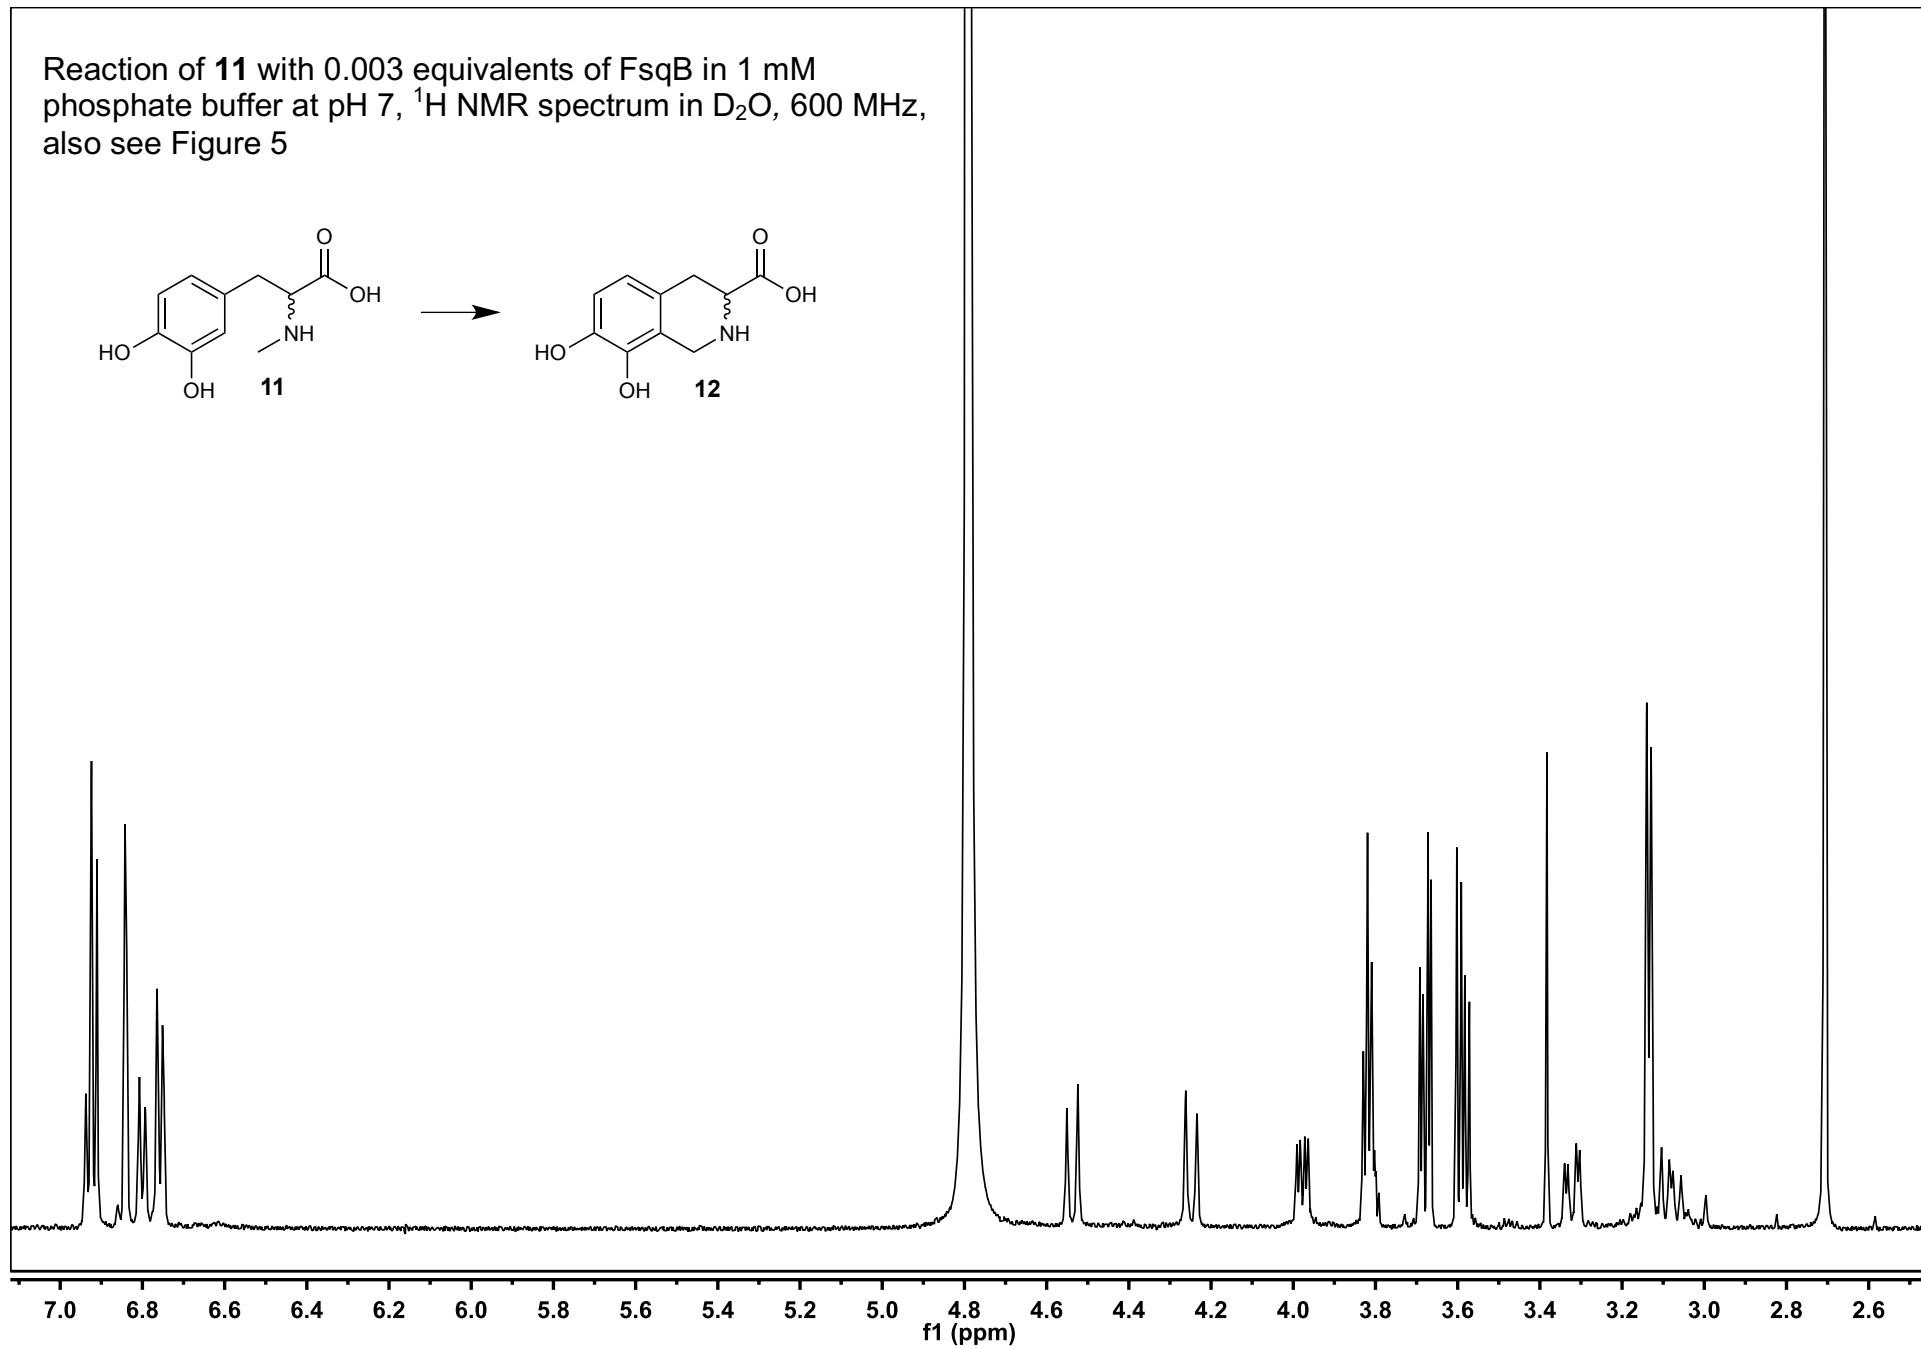

6,7-Dihydroxy-1,2,3,4-tetrahydroisoquinoline-3-carboxylic acid (**13**) in 1 mM phosphate buffer at pH 7,  
 $^1\text{H}$  NMR spectrum water- $d_2$ , 600 MHz

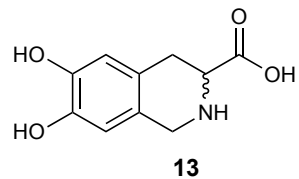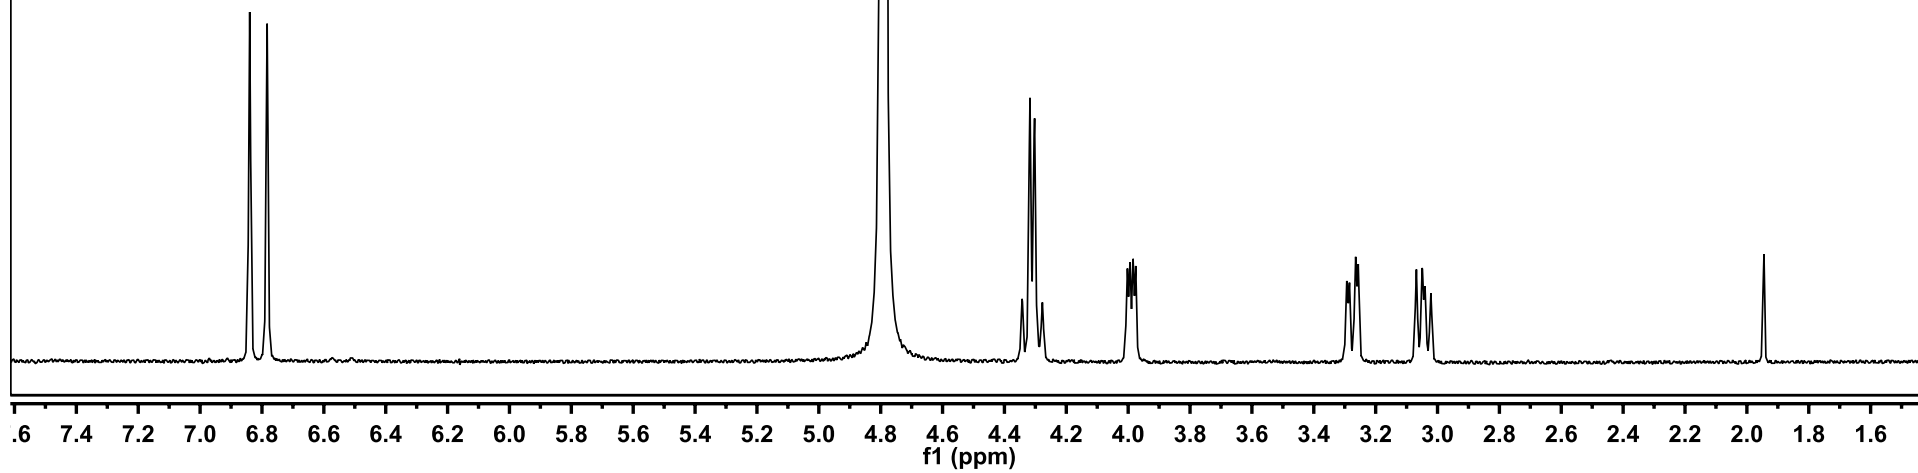

Supplement: NIHMS762624-supplement-1.pdf [file NIHMS762624-supplement-1.pdf]
